# Supplementary material for: The architecture of intra-organism mutation rate variation in plants
Source: PLoS Biol. 2019 Apr 9;17(4):e3000191. doi: 10.1371/journal.pbio.3000191 (PMC6456163; doi:10.1371/journal.pbio.3000191)
Supplement: S1 Data — (XLSX) [file pbio.3000191.s018.xlsx]

## Sheet: Sheet1
S1 Data. Statistics of all sequenced samples.
Species	Individual ID	Tissue	Sample ID	Total Reads	Clean Data (G)	Clean Depth	Mapped Depth (Mapping Quality ≥ 20)	Genome (%) covered by reads ≥ 5
Arabidopsis thaliana	Col17	Rosette Leaf	Col17_RL1-1	32738770	4.91082	40.9235	29.21	96.2
Arabidopsis thaliana	Col17	Rosette Leaf	Col17_RL2-2	32650128	4.89752	40.8127	27.64	85.8
Arabidopsis thaliana	Col17	Rosette Leaf	Col17_RL2-3	29454162	4.41812	36.8177	25.55	87.2
Arabidopsis thaliana	Col17	Rosette Leaf	Col17_RL3-1	30862136	4.62932	38.5777	26.31	87.9
Arabidopsis thaliana	Col17	Rosette Leaf	Col17_RL3-2	34924184	5.23863	43.6552	30.31	89.5
Arabidopsis thaliana	Col17	Rosette Leaf	Col17_RL3-3	29376968	4.40655	36.7212	23.95	88
Arabidopsis thaliana	Col17	Rosette Leaf	Col17_RL4-1	33977238	5.09659	42.4715	29.21	93
Arabidopsis thaliana	Col17	Rosette Leaf	Col17_RL4-2	38877398	5.83161	48.5967	33.39	90.1
Arabidopsis thaliana	Col17	Rosette Leaf	Col17_RL4-3	29222794	4.38342	36.5285	25.35	88
Arabidopsis thaliana	Col17	Stem Leaf	Col17_SL1-1	32034752	4.80521	40.0434	29.73	97.8
Arabidopsis thaliana	Col17	Stem Leaf	Col17_SL1-2	35239916	5.28599	44.0499	30.11	88.1
Arabidopsis thaliana	Col17	Stem Leaf	Col17_SL1-3	33000296	4.95004	41.2504	29.18	90.5
Arabidopsis thaliana	Col17	Stem Leaf	Col17_SL2-1	33189846	4.97848	41.4873	28.81	90.1
Arabidopsis thaliana	Col17	Stem Leaf	Col17_SL2-2	68657076	10.2986	85.8213	54.5	91
Arabidopsis thaliana	Col17	Stem Leaf	Col17_SL2-3	55699886	8.35498	69.6249	46.04	88.2
Arabidopsis thaliana	Col17	Stem Leaf	Col17_SL3-1	55313548	8.29703	69.1419	47.43	93
Arabidopsis thaliana	Col17	Stem Leaf	Col17_SL3-2	63975280	9.59629	79.9691	53.27	94.9
Arabidopsis thaliana	Col17	Stem Leaf	Col17_SL3-3	56915066	8.53726	71.1438	49.64	95.3
Arabidopsis thaliana	Col17	Stem Leaf	Col17_SL4-1	69025964	10.3539	86.2825	61.34	98.5
Arabidopsis thaliana	Col17	Stem Leaf	Col17_SL4-2	35731266	5.35969	44.6641	32.98	98.4
Arabidopsis thaliana	Col17	Stem Leaf	Col17_SL4-3	39098630	5.86479	48.8733	36.07	98.4
Arabidopsis thaliana	Col17	Stem Leaf	Col17_SL5-1	35684608	5.35269	44.6058	33.78	98.4
Arabidopsis thaliana	Col17	Stem Leaf	Col17_SL5-3	40832158	6.12482	51.0402	37.85	98.4
Arabidopsis thaliana	Col17	Stem Leaf	Col17_SL6-1	42806832	6.42102	53.5085	39.67	98.4
Arabidopsis thaliana	Col17	Stem Leaf	Col17_SL6-2	39340542	5.90108	49.1757	37.16	98.4
Arabidopsis thaliana	Col17	Stem Leaf	Col17_SL7-1	37439300	5.6159	46.7991	34.52	98.4
Arabidopsis thaliana	Col17	Stem Leaf	Col17_SL7-2	41594842	6.23923	51.9936	38.17	98.4
Arabidopsis thaliana	Col17	Stem Leaf	Col17_SL8-1	37198408	5.57976	46.498	34.23	98.4
Arabidopsis thaliana	Col17	Stem Leaf	Col17_SL8-2	41958784	6.29382	52.4485	38.88	98.4
Arabidopsis thaliana	Col24	Rosette Leaf	Col24_RL1-1	41075900	6.16139	51.3449	34.44	92.2
Arabidopsis thaliana	Col24	Rosette Leaf	Col24_RL1-2	32905176	4.93578	41.1315	28.19	89.2
Arabidopsis thaliana	Col24	Rosette Leaf	Col24_RL1-3	33331032	4.99965	41.6638	25.96	91.1
Arabidopsis thaliana	Col24	Rosette Leaf	Col24_RL2-1	45405534	6.81083	56.7569	37.45	92.2
Arabidopsis thaliana	Col24	Rosette Leaf	Col24_RL2-3	48734636	7.3102	60.9183	42.98	98.1
Arabidopsis thaliana	Col24	Rosette Leaf	Col24_RL3-1	49305696	7.39585	61.6321	39.32	93.3
Arabidopsis thaliana	Col24	Rosette Leaf	Col24_RL3-2	47954746	7.19321	59.9434	37.47	92.1
Arabidopsis thaliana	Col24	Rosette Leaf	Col24_RL3-3	50313970	7.5471	62.8925	39.68	96.8
Arabidopsis thaliana	Col24	Rosette Leaf	Col24_RL4-1	66482198	9.97233	83.1027	46.47	91.3
Arabidopsis thaliana	Col24	Rosette Leaf	Col24_RL4-2	59898446	8.98477	74.8731	48.94	95
Arabidopsis thaliana	Col24	Rosette Leaf	Col24_RL4-3	69143636	10.3715	86.4295	55.52	97.4
Arabidopsis thaliana	Col24	Rosette Leaf	Col24_RL5-1	54375202	8.15628	67.969	44.1	96.1
Arabidopsis thaliana	Col24	Rosette Leaf	Col24_RL5-3	52522294	7.87834	65.6529	43.05	89.8
Arabidopsis thaliana	Col24	Stem Leaf	Col24_SL1-1	36078984	5.41185	45.0987	33.92	98.4
Arabidopsis thaliana	Col24	Stem Leaf	Col24_SL1-2	29302872	4.39543	36.6286	24.03	90.1
Arabidopsis thaliana	Col24	Stem Leaf	Col24_SL1-3	31613390	4.74201	39.5167	29.49	96.9
Arabidopsis thaliana	Col24	Stem Leaf	Col24_SL2-1	36536530	5.48048	45.6707	34.47	98.4
Arabidopsis thaliana	Col24	Stem Leaf	Col24_SL2-2	45195408	6.77931	56.4943	43.32	98.4
Arabidopsis thaliana	Col24	Stem Leaf	Col24_SL2-3	35734854	5.36023	44.6686	31.82	93.1
Arabidopsis thaliana	Col24	Stem Leaf	Col24_SL3-1	46814346	7.02215	58.5179	43.26	98.4
Arabidopsis thaliana	Col24	Stem Leaf	Col24_SL3-2	44247786	6.63717	55.3097	41.74	98.4
Arabidopsis thaliana	Col24	Stem Leaf	Col24_SL3-3	48688346	7.30325	60.8604	46.3	98.4
Arabidopsis thaliana	Col24	Stem Leaf	Col24_SL4-1	44855796	6.72837	56.0697	41.98	98.4
Arabidopsis thaliana	Col24	Stem Leaf	Col24_SL4-2	38263850	5.73958	47.8298	36.86	98.4
Arabidopsis thaliana	Col24	Stem Leaf	Col24_SL4-3	35395576	5.30934	44.2445	34.68	98.4
Arabidopsis thaliana	Col24	Stem Leaf	Col24_SL5-1	40021150	6.00317	50.0264	38.82	98.4
Arabidopsis thaliana	Col24	Stem Leaf	Col24_SL5-2	30720956	4.60814	38.4012	28.36	91.7
Arabidopsis thaliana	Col24	Stem Leaf	Col24_SL5-3	30462140	4.56932	38.0777	27.76	92.6
Arabidopsis thaliana	Col24	Stem Leaf	Col24_SL6-2	29145866	4.37188	36.4323	26.79	92.9
Arabidopsis thaliana	Col24	Stem Leaf	Col24_SL7-1	35642880	5.34643	44.5536	31.48	90.6
Arabidopsis thaliana	Col24	Stem Leaf	Col24_SL7-2	49698526	7.45478	62.1232	42.15	91.6
Arabidopsis thaliana	Col24	Stem Leaf	Col24_SL8-2	38731984	5.8098	48.415	32.63	87.4
Arabidopsis thaliana	Col24	Stem Leaf	Col24_SL8-3	43890680	6.5836	54.8633	37.77	90.2
Arabidopsis thaliana	Col24	Stem Leaf	Col24_SL9-1	34097590	5.11464	42.622	29.65	87.9
Arabidopsis thaliana	Col24	Stem Leaf	Col24_SL9-2	33600348	5.04005	42.0004	30.09	88.2
Brachypodium distachyon	WD2	Leaf	WD2_B1-1-L1	96709912	14.5065	51.8089	44.13	98.6
Brachypodium distachyon	WD2	Leaf	WD2_B1-1-L2	93393436	14.009	50.0322	42.62	98.7
Brachypodium distachyon	WD2	Leaf	WD2_B1-1-L3	74815494	11.2223	40.0797	34.35	98.7
Brachypodium distachyon	WD2	Leaf	WD2_B1-1-L4	75702476	11.3554	40.5549	34.77	98.7
Brachypodium distachyon	WD2	Lemma	WD2_B1-1-S1-1	82885486	12.4328	44.4029	37.17	97.7
Brachypodium distachyon	WD2	Lemma	WD2_B1-1-S1-2	203393564	30.509	108.961	84.8	99.1
Brachypodium distachyon	WD2	Leaf	WD2_B1-2-L1	75896258	11.3844	40.6587	34.98	97.7
Brachypodium distachyon	WD2	Leaf	WD2_B1-2-L2	79978628	11.9968	42.8457	34.24	98.3
Brachypodium distachyon	WD2	Leaf	WD2_B1-2-L3	88970928	13.3456	47.663	40.77	98.8
Brachypodium distachyon	WD2	Leaf	WD2_B2-1-1-L1	104791428	15.7187	56.1383	47.75	97.8
Brachypodium distachyon	WD2	Leaf	WD2_B2-1-1-L2	122389226	18.3584	65.5657	54.64	97.9
Brachypodium distachyon	WD2	Leaf	WD2_B2-1-1-L3	132795818	19.9194	71.1406	59.12	98.6
Brachypodium distachyon	WD2	Lemma	WD2_B2-1-1-S1	194624786	29.1937	104.263	82.13	99.1
Brachypodium distachyon	WD2	Leaf	WD2_B2-1-2-1-L1	112041778	16.8063	60.0224	50.65	98.8
Brachypodium distachyon	WD2	Leaf	WD2_B2-1-2-1-L2	90399602	13.5599	48.4284	40.7	98.5
Brachypodium distachyon	WD2	Leaf	WD2_B2-1-2-1-L3	86801558	13.0202	46.5008	39.26	98.1
Brachypodium distachyon	WD2	Lemma	WD2_B2-1-2-1-S1	96751552	14.5127	51.8312	42.25	98.1
Brachypodium distachyon	WD2	Leaf	WD2_B2-1-2-2-L1	95402292	14.3103	51.1084	43.81	98.4
Brachypodium distachyon	WD2	Leaf	WD2_B2-1-2-2-L2	196989492	29.5484	105.53	80.88	99.1
Brachypodium distachyon	WD2	Leaf	WD2_B2-1-2-2-L3	180102208	27.0153	96.4833	76.05	99.1
Brachypodium distachyon	WD2	Lemma	WD2_B2-1-2-2-S1	71101774	10.6653	38.0902	30.76	98.7
Brachypodium distachyon	WD2	Leaf	WD2_B2-2-L1	107484012	16.1226	57.5807	49.27	98.1
Brachypodium distachyon	WD2	Leaf	WD2_B2-2-L2	95379036	14.3069	51.0959	43.14	98.1
Brachypodium distachyon	WD2	Leaf	WD2_B2-2-L3	106551488	15.9827	57.0812	49.13	98
Brachypodium distachyon	WD2	Leaf	WD2_B2-2-L4	103399440	15.5099	55.3926	47.75	98.2
Brachypodium distachyon	WD2	Leaf	WD2_B2-2-L5	123485132	18.5228	66.1527	55.67	98.1
Brachypodium distachyon	WD2	Lemma	WD2_B2-2-S1-1	69872796	10.4809	37.4319	30.5	98.1
Brachypodium distachyon	WD2	Leaf	WD2_B3-1-L1	78390600	11.7586	41.995	36.55	97.6
Brachypodium distachyon	WD2	Leaf	WD2_B3-1-L2	77698860	11.6548	41.6244	35.61	97.8
Brachypodium distachyon	WD2	Leaf	WD2_B3-1-L3	86998550	13.0498	46.6064	39.88	97.9
Brachypodium distachyon	WD2	Leaf	WD2_B3-1-L4	84530696	12.6796	45.2843	38.31	98.8
Brachypodium distachyon	WD2	Leaf	WD2_B3-2-L2	92557656	13.8836	49.5845	41.22	97.9
Brachypodium distachyon	WD2	Leaf	WD2_B3-2-L3	90346570	13.552	48.3999	41.76	97.4
Brachypodium distachyon	WD2	Leaf	WD2_B3-2-L4	88601326	13.2902	47.465	40.7	97.4
Brachypodium distachyon	WD2	Lemma	WD2_B3-2-S1	68761640	10.3142	36.8366	29.79	98.6
Brachypodium distachyon	WD2	Leaf	WD2_B3-3-L1	95810868	14.3716	51.3273	43.51	97.8
Brachypodium distachyon	WD2	Root	WD2_R1	88716374	13.3075	47.5266	30.64	98.9
Brachypodium distachyon	WD2	Root	WD2_R10	91968766	13.7953	49.269	34.91	98.9
Brachypodium distachyon	WD2	Root	WD2_R2	92362190	13.8543	49.4797	33.87	99
Brachypodium distachyon	WD2	Root	WD2_R4	95931800	14.3898	51.392	32.62	98.9
Brachypodium distachyon	WD2	Root	WD2_R6	103755864	15.5634	55.5835	37.35	99.1
Brachypodium distachyon	WD2	Root	WD2_R7	94339998	14.151	50.5393	33.17	99
Brachypodium distachyon	WD2	Root	WD2_R8	92968528	13.9453	49.8046	35.37	99
Brachypodium distachyon	WD2	Root	WD2_R9	89228636	13.3843	47.8011	29.21	98.9
Brachypodium distachyon	WD2	Seed	WD2_B1-1-S3-P6	74449326	11.1674	39.8836	35.72	98.3
Brachypodium distachyon	WD2	Seed	WD2_B2-1-1-S2-P1	88330318	13.2495	47.3198	41.32	98.5
Brachypodium distachyon	WD2	Seed	WD2_B2-1-2-1-S2-P2	89055212	13.3583	47.7081	42.35	98.5
Brachypodium distachyon	WD2	Seed	WD2_B2-1-2-1-S2-P3	99096982	14.8645	53.0877	46.51	98.4
Brachypodium distachyon	WD2	Seed	WD2_B2-1-2-1-S3-P4	82521034	12.3782	44.2077	38.94	98.3
Brachypodium distachyon	WD2	Seed	WD2_B2-1-2-1-S3-P5	84713710	12.7071	45.3823	39.89	98.5
Brachypodium distachyon	WD2	Seed	WD2_B2-1-2-2-S3-P1	67491966	10.1238	36.1564	32.11	98.5
Brachypodium distachyon	WD2	Seed	WD2_B2-1-2-2-S3-P3	67554498	10.1332	36.1899	32.15	98.5
Brachypodium distachyon	WD2	Seed	WD2_B2-1-2-2-S3-P4	88004414	13.2007	47.1452	41.35	98.4
Brachypodium distachyon	WD2	Seed	WD2_B2-1-2-2-S3-P5	92971918	13.9458	49.8064	43.28	98.4
Brachypodium distachyon	WD2	Seed	WD2_B2-2-S2-P5	76176010	11.4264	40.8086	35.75	98.2
Brachypodium distachyon	WD2	Seed	WD2_B3-1-S-P3	74356158	11.1534	39.8337	34.56	98.4
Brachypodium distachyon	WD2	Seed	WD2_B3-2-S2-P1	80634506	12.0952	43.1971	37.82	98.4
Brachypodium distachyon	WD2	Seed	WD2_B3-2-S2-P3	75442730	11.3164	40.4157	35.71	98.4
Brachypodium distachyon	WD2	Seed	WD2_B3-2-S3-P1	69534722	10.4302	37.2507	32.85	98.4
Brachypodium distachyon	WD2	Seed	WD2_B3-3-S-P4	96310498	14.4466	51.5949	44.74	98.3
Fragaria vesca	FH1	Leaf	FH_B1-1a-1a-L1	91667294	13.7501	62.5004	54.27	99.4
Fragaria vesca	FH1	Leaf	FH_B1-1a-1b-L2	110224140	16.5336	75.1528	64.47	99.5
Fragaria vesca	FH1	Leaf	FH_B1-1a-2a-L2	88282918	13.2424	60.1929	50.94	98
Fragaria vesca	FH1	Leaf	FH_B1-1a-2b-L1	86000806	12.9001	58.6369	41.59	97.4
Fragaria vesca	FH1	Leaf	FH_B1-1a-2c-L3	104196496	15.6295	71.0431	59.4	98.3
Fragaria vesca	FH1	Leaf	FH_B1-1a-2d-L3	92798248	13.9197	63.2715	53.2	96.3
Fragaria vesca	FH1	Leaf	FH_B1-1a-3a-L3	106145288	15.9218	72.3718	61.68	99.5
Fragaria vesca	FH1	Leaf	FH_B1-1a-3b-L3	105623296	15.8435	72.0159	55.8	98.1
Fragaria vesca	FH1	Leaf	FH_B1-1a-4a-L1	88781414	13.3172	60.5328	48.89	98.1
Fragaria vesca	FH1	Leaf	FH_B1-1a-L	97618922	14.6428	66.5584	58.73	99.3
Fragaria vesca	FH1	Runner	FH_B1-1a-S1	77556858	11.6335	52.8797	38.98	93.3
Fragaria vesca	FH1	Leaf	FH_B1-1b-1a-L2	90000544	13.5001	61.364	47.52	97.4
Fragaria vesca	FH1	Leaf	FH_B1-1b-1b-L2	130199492	19.5299	88.7724	69.33	96.8
Fragaria vesca	FH1	Leaf	FH_B1-1b-1c-L1	93426992	14.014	63.7002	50.71	97.6
Fragaria vesca	FH1	Leaf	FH_B1-1b-1e-L3	110890880	16.6336	75.6074	63.78	97.2
Fragaria vesca	FH1	Leaf	FH_B1-1b-2a-L3	96058492	14.4088	65.4944	53.33	97.4
Fragaria vesca	FH1	Leaf	FH_B1-1b-2b-L3	96485034	14.4728	65.7853	53.52	98.6
Fragaria vesca	FH1	Leaf	FH_B1-1b-4b-L3	107052756	16.0579	72.9905	60.59	99
Fragaria vesca	FH1	Leaf	FH_B1-1b-5a-L1	90553672	13.5831	61.7411	46.71	94.9
Fragaria vesca	FH1	Leaf	FH_B1-1c-1a-L2	88315348	13.2473	60.215	43.57	97.4
Fragaria vesca	FH1	Leaf	FH_B1-1c-1b-2a-L1	78874374	11.8312	53.778	46.15	97.3
Fragaria vesca	FH1	Leaf	FH_B1-1c-1c-L3	93542174	14.0313	63.7788	49.45	97.2
Fragaria vesca	FH1	Leaf	FH_B1-1c-2a-L2	154060842	23.1091	105.041	66.8	98.5
Fragaria vesca	FH1	Leaf	FH_B1-1c-L3	122692128	18.4038	83.6537	52.23	97.4
Fragaria vesca	FH1	Runner	FH_B1-1c-S1	92580258	13.887	63.1229	28	98.6
Fragaria vesca	FH1	Leaf	FH_B1-1d-L2	70742502	10.6114	48.2335	39.63	95.8
Fragaria vesca	FH1	Runner	FH_B1-1d-S2	94466414	14.17	64.4089	37.74	98.8
Fragaria vesca	FH1	Leaf	FH_B1-1e-2a-L1	75579634	11.3369	51.5316	40.19	95.6
Fragaria vesca	FH1	Leaf	FH_B1-1e-3b-L2	106307640	15.9461	72.4825	48.52	99.6
Fragaria vesca	FH1	Leaf	FH_B1-1e-5a-L2	101170812	15.1756	68.9801	54.66	98.7
Fragaria vesca	FH1	Leaf	FH_B1-2b-3d-L1	77778460	11.6668	53.0308	44.32	99.3
Fragaria vesca	FH1	Leaf	FH_B1-2b-L1	97516304	14.6274	66.4884	54	98.2
Fragaria vesca	FH1	Leaf	FH_B1-2d-2d-L3	90627006	13.5941	61.7911	50.67	99.4
Fragaria vesca	FH1	Runner	FH_B1-S1	81284566	12.1927	55.4213	44.45	96.3
Fragaria vesca	FH1	Leaf	FH_B2-1a-L1	128927754	19.3392	87.9053	74.99	99.6
Fragaria vesca	FH1	Leaf	FH_B2-1e-L3	89168710	13.3753	60.7968	46.76	97.4
Fragaria vesca	FH1	Leaf	FH_B2-2d-3d-L2	81558546	12.2338	55.6081	47.45	99.4
Fragaria vesca	FH1	Leaf	FH_B3-1a-L	136812532	20.5219	93.2813	83.9	99.6
Fragaria vesca	FH1	Leaf	FH_B3-1d-L1	112936554	16.9405	77.0022	61.06	97.5
Fragaria vesca	FH1	Leaf	FH_B3-2b-2c-L1	118114972	17.7172	80.5329	60.64	98.5
Fragaria vesca	FH1	Leaf	FH_B4-1a-1e-L3	108004386	16.2007	73.6394	59.66	97.6
Fragaria vesca	FH1	Leaf	FH_B4-1a-L1	106392932	15.9589	72.5406	60.62	98
Fragaria vesca	FH1	Leaf	FH_B4-1c-L2	100893222	15.134	68.7908	55.49	97.3
Fragaria vesca	FH1	Leaf	FH_B5-1a-3b-L2	89033616	13.355	60.7047	51.84	97.5
Fragaria vesca	FH1	Leaf	FH_B6-1a-L6	73074768	10.9612	49.8237	41.61	96.2
Fragaria vesca	FH1	Leaf	FH_B6-1e-L3	81776616	12.2665	55.7568	46.69	96.3
Fragaria vesca	FH1	Leaf	FH_B7-1a-L3	89318718	13.3978	60.8991	49.48	96.4
Fragaria vesca	FH1	Leaf	FH_B8-1a-L2	118016840	17.7025	80.466	62.97	99.3
Fragaria vesca	FH1	Leaf	FH_MP-L1	117671254	17.6507	80.2304	66.13	99.4
Oryza sativa	DG1	Leaf	DG1_1-L1	147600478	22.1401	58.2633	41.77	82.4
Oryza sativa	DG1	Leaf	DG1_2-L2	166986100	25.0479	65.9156	47.85	82.4
Oryza sativa	DG1	Root	DG1_2-R1	199570344	29.9356	78.7778	9.07	73.3
Oryza sativa	DG1	Leaf	DG1_3-L2	180373034	27.056	71.1999	51.18	82.7
Oryza sativa	DG1	Leaf	DG1_4-L2	191554700	28.7332	75.6137	51.79	82.9
Oryza sativa	DG1	Root	DG1_4-R6	190748342	28.6123	75.2954	12.26	77.8
Oryza sativa	DG1	Leaf	DG1_5-L2	157096674	23.5645	62.0118	45.06	82.3
Oryza sativa	DG1	Leaf	DG1_6-L1	177568174	26.6352	70.0927	50.57	82.8
Oryza sativa	DG1	Root	DG1_A-R1	152532622	22.8799	60.2102	8.05	72.4
Oryza sativa	DG1	Root	DG1_A-R11	193902660	29.0854	76.5405	8.34	72.1
Oryza sativa	DG1	Root	DG1_A-R12	153940718	23.0911	60.7661	5.31	55.8
Oryza sativa	DG1	Root	DG1_A-R13*	161469962	24.2205	63.7381	3.54	31.9
Oryza sativa	DG1	Root	DG1_A-R14	176582468	26.4874	69.7036	5.25	55.2
Oryza sativa	DG1	Root	DG1_A-R19	163680566	24.5521	64.6107	8.48	74.1
Oryza sativa	DG1	Root	DG1_A-R20*	147523506	22.1285	58.233	3.13	25.3
Oryza sativa	DG1	Root	DG1_A-R21	132264574	19.8397	52.2097	5.15	54.8
Oryza sativa	DG1	Root	DG1_A-R25	145072728	21.7609	57.2656	10.23	76.1
Oryza sativa	DG1	Root	DG1_A-R26	166922016	25.0383	65.8903	6.01	63
Oryza sativa	DG1	Root	DG1_A-R27*	113347790	17.0022	44.7425	4.09	40.4
Oryza sativa	DG1	Root	DG1_A-R28	152544488	22.8817	60.2149	5.88	60.1
Oryza sativa	DG1	Root	DG1_A-R29	110043554	16.5065	43.4382	8.23	72.1
Oryza sativa	DG1	Root	DG1_A-R30*	105992184	15.8988	41.839	3.41	30.1
Oryza sativa	DG1	Root	DG1_A-R31	146364804	21.9547	57.7756	7.83	70.5
Oryza sativa	DG1	Root	DG1_A-R33	170044734	25.5067	67.1229	11.9	78.4
Oryza sativa	DG1	Root	DG1_A-R34	115546572	17.332	45.6105	5.46	58
Oryza sativa	DG1	Root	DG1_A-R37*	125064544	18.7597	49.3676	36.81	86.4
Oryza sativa	DG1	Root	DG1_A-R39*	133578908	20.0368	52.7285	2.68	18.4
Oryza sativa	DG1	Root	DG1_A-R40*	144173200	21.626	56.9105	3.26	27.7
Oryza sativa	DG1	Root	DG1_A-R6	143146268	21.4719	56.5051	4.39	45.4
Oryza sativa	DG1	Root	DG1_A-R7	193002480	28.9504	76.1852	7.97	71.7
Oryza sativa	DG1	Root	DG1_A-R9*	164483846	24.6726	64.9278	4.06	40.2
Oryza sativa	KT1	Leaf	KT1-1	125215410	18.7823	49.4271	34.6	81
Oryza sativa	KT1	Leaf	KT1-2	141574010	21.2361	55.8845	38.66	81.2
Oryza sativa	KT1	Leaf	KT1-5	164139992	24.621	64.7921	43.16	80.2
Oryza sativa	KT1	Leaf	KT1-6	148755120	22.3133	58.7191	40.3	81.1
Oryza sativa	KT1	Leaf	KT1-7	166112678	24.9169	65.5708	44.89	81.6
Oryza sativa	KT1	Leaf	KT1-8	155368374	23.3053	61.3296	42.24	81.4
Oryza sativa	NIPB	Leaf	NIPB_T1	76875882	11.5314	30.9152	24.88	94.8
Oryza sativa	NIPB	Leaf	NIPB_T10	91001532	13.6502	36.5958	30.39	95.2
Oryza sativa	NIPB	Leaf	NIPB_T11	84539608	12.6809	33.9972	28.37	95.3
Oryza sativa	NIPB	Leaf	NIPB_T2	81610888	12.2416	32.8194	26.82	94.9
Oryza sativa	NIPB	Leaf	NIPB_T3	98810338	14.8216	39.7361	32.84	95.3
Oryza sativa	NIPB	Leaf	NIPB_T4	92900684	13.9351	37.3595	30.39	95.1
Oryza sativa	NIPB	Leaf	NIPB_T6	90313906	13.5471	36.3193	29.5	95.3
Oryza sativa	NIPB	Leaf	NIPB_T7	102143348	15.3215	41.0764	33.46	95.7
Oryza sativa	NIPB	Leaf	NIPB_T8	88570746	13.2856	35.6183	29.45	95.3
Oryza sativa	NIPB	Leaf	NIPB_T9	80748280	12.1122	32.4725	26.95	94.5
Oryza sativa	NIPB	Leaf	NIPB-S2-9-2-T3	102531086	15.3797	41.2323	34.18	95.6
Oryza sativa	NIPB	Leaf	NIPB-S2-9-2-T9	86646540	12.997	34.8445	28.95	95.6
Oryza sativa	NIPB	Leaf	NIPB-S8-10-3	93560648	14.0341	37.6249	31.38	95.5
Oryza sativa	NIPB	Leaf	NIPB-S8-10-4	90032690	13.5049	36.2062	29.85	95.4
Oryza sativa	NIPB	Leaf	NIPB-S8-12-T1	82451718	12.3678	33.1575	27.53	95.5
Oryza sativa	NIPB	Leaf	NIPB-S8-12-T2	89745764	13.4619	36.0908	30.41	95.1
Oryza sativa	NIPB	Leaf	NIPB-S8-12-T3	78569080	11.7854	31.5961	26.6	94.2
Oryza sativa	NIPB	Leaf	NIPB-S8-12-T4	98935978	14.8404	39.7866	33.98	95
Oryza sativa	NIPB	Leaf	NIPB-S8-12-T5	91424584	13.7137	36.7659	31.56	95
Oryza sativa	NIPB	Leaf	NIPB-S8-12-T8	66361398	9.95421	26.6869	22.82	94.4
Oryza sativa	NIPB	Leaf	NIPB-S8-12-T9	85571028	12.8357	34.4119	29.35	95.2
Oryza sativa	NIPB	Leaf	NIPB-S8-16-1	82985580	12.4478	33.3722	28.69	95.1
Oryza sativa	NIPB	Leaf	NIPB-S8-8-1	79130328	11.8695	31.8218	26.83	95.1
Oryza sativa	NIPB	Leaf	NIPB-S8-9-2	87170184	13.0755	35.055	29.64	95.2
Oryza sativa	NIPB	Leaf	NIPB-S8-9-3	88940810	13.3411	35.7671	30.22	94.4
Oryza sativa	NIPB	Leaf	NIPB-S8-9-5	92415542	13.8623	37.1644	31.85	94.7
Oryza sativa	NIPB	Leaf	NIPB-S8-9-6	87722888	13.1584	35.2773	30.06	94.9
Oryza sativa	PA1	Leaf	PA1-10	140149044	21.0224	55.322	39.34	85.9
Oryza sativa	PA1	Leaf	PA1-3	123591898	18.5388	48.7863	33.03	85.5
Oryza sativa	PA1	Leaf	PA1-5	161450852	24.2176	63.7306	46.91	85.7
Oryza sativa	PA1	Leaf	PA1-6	186612024	27.9918	73.6626	53.32	86.5
Oryza sativa	PA1	Leaf	PA1-7	142116238	21.3174	56.0985	40.55	85.7
Oryza sativa	PA1	Leaf	PA1-8	137155814	20.5734	54.1405	39	85.8
Oryza sativa	PA1	Leaf	PA1-9	92098638	13.8148	36.3547	25.82	81.2
Prunus mira	G1	Leaf	G1_B1-1	74303220	11.1455	46.4395	30.27	78.3
Prunus mira	G1	Leaf	G1_B1-2	66221686	9.93325	41.3886	27.08	78.1
Prunus mira	G1	Leaf	G1_B1-3-1	62167280	9.32509	38.8546	25.89	78
Prunus mira	G1	Leaf	G1_B1-3-2	74838976	11.2258	46.7744	29.83	78.4
Prunus mira	G1	Leaf	G1_B1-3-3	66546268	9.98194	41.5914	25.3	77.5
Prunus mira	G1	Leaf	G1_B1-3-4-1	64526690	9.679	40.3292	27.3	78.2
Prunus mira	G1	Leaf	G1_B1-3-4-2	79083594	11.8625	49.4272	31.49	78.8
Prunus mira	G1	Leaf	G1_B1-3-4-3	70964234	10.6446	44.3526	28.85	78.2
Prunus mira	G1	Leaf	G1_B1-3-5	78084260	11.7126	48.8027	30.59	78.5
Prunus mira	G1	Leaf	G1_B1-4	78134940	11.7202	48.8343	29.49	77.9
Prunus mira	G1	Leaf	G1_B1-5	78861414	11.8292	49.2884	33.64	78.8
Prunus mira	G1	Leaf	G1_B1-6-1	69307988	10.3962	43.3175	29.5	78.4
Prunus mira	G1	Leaf	G1_B1-6-2	79782022	11.9673	49.8638	33.38	78.8
Prunus mira	G1	Leaf	G1_B1-6-3	86032410	12.9049	53.7703	32.35	78.9
Prunus mira	G1	Leaf	G1_B1-7	89837644	13.4756	56.1485	34.68	79.2
Prunus mira	G1	Leaf	G1_B1-8-1	67283022	10.0925	42.0519	27	78.2
Prunus mira	G1	Leaf	G1_B1-8-2	71319736	10.698	44.5748	29.72	78.4
Prunus mira	G1	Leaf	G1_B2-1	61366178	9.20493	38.3539	26.07	77.7
Prunus mira	G1	Leaf	G1_B2-2	74887944	11.2332	46.805	31.02	78.5
Prunus mira	G1	Leaf	G1_B2-3	67021762	10.0533	41.8886	27.49	78.2
Prunus mira	G1	Leaf	G1_B2-4-1	96633628	14.495	60.396	38.76	79.2
Prunus mira	G1	Leaf	G1_B2-4-2	79236046	11.8854	49.5225	32.29	78.5
Prunus mira	G1	Leaf	G1_B2-5	82023562	12.3035	51.2647	34.94	79
Prunus mira	G1	Leaf	G1_B2-6	60035620	9.00534	37.5223	24.23	77.1
Prunus mira	G1	Leaf	G1_B4	78359364	11.7539	48.9746	30.99	78.6
Prunus mira	G1	Leaf	G1_B5	55698478	8.35477	34.8115	23.98	77.5
Prunus mira	G1	Leaf	G1_T1	63362308	9.50435	39.6014	21.7	77.1
Prunus mira	G1	Leaf	G1_T2-1	79746692	11.962	49.8417	32.89	78.6
Prunus mira	G1	Leaf	G1_T2-2	69490564	10.4236	43.4316	28.29	78.1
Prunus mira	G1	Leaf	G1_T3	62698764	9.40481	39.1867	26.16	77.7
Prunus mira	G1	Leaf	G1_T4-1	63650508	9.54758	39.7816	26.36	77.8
Prunus mira	G1	Leaf	G1_T4-2	64943700	9.74155	40.5898	26.89	77.8
Prunus mira	G2	Leaf	G2_B1-1-1	82944878	12.4417	51.8405	31.73	78.1
Prunus mira	G2	Leaf	G2_B1-1-2	66647102	9.99707	41.6544	26.82	77.5
Prunus mira	G2	Leaf	G2_B1-2-1	67722958	10.1584	42.3268	26.78	77.3
Prunus mira	G2	Leaf	G2_B1-2-2	70651396	10.5977	44.1571	28.01	78.1
Prunus mira	G2	Leaf	G2_B2-1-1	78767180	11.8151	49.2295	30.58	78
Prunus mira	G2	Leaf	G2_B2-1-2	63047224	9.45708	39.4045	25.75	77.2
Prunus mira	G2	Leaf	G2_B2-1-3	80374682	12.0562	50.2342	31.44	78.2
Prunus mira	G2	Leaf	G2_B2-2	68147552	10.2221	42.5922	27.34	77.6
Prunus mira	G2	Leaf	G2_B2-3-1	83936332	12.5904	52.4602	32.2	78.2
Prunus mira	G2	Leaf	G2_B2-3-2	88261426	13.2392	55.1634	35.98	78.6
Prunus mira	G2	Leaf	G2_B2-4	66631544	9.99473	41.6447	26.94	77.5
Prunus mira	G2	Leaf	G2_B2-5	77690970	11.6536	48.5569	30.7	77.8
Prunus mira	GL2	Leaf of Fruit	GL2_B1-1-1-1-FR	164212240	24.6318	102.633	46.8	79.3
Prunus mira	GL2	Leaf	GL2_B1-1-1-1-L1-1	79509006	11.9264	49.6931	32.15	77.7
Prunus mira	GL2	Leaf	GL2_B1-1-1-1-L1-2	85105300	12.7658	53.1908	35.4	78.2
Prunus mira	GL2	Leaf	GL2_B1-1-1-1-L2-2	87330764	13.0996	54.5817	36.14	78.2
Prunus mira	GL2	Leaf of Fruit	GL2_B1-1-1-2-FR	156264452	23.4397	97.6653	46.41	78.7
Prunus mira	GL2	Leaf	GL2_B1-1-1-2-L1-1	98782818	14.8174	61.7393	33.09	77.4
Prunus mira	GL2	Leaf	GL2_B1-1-1-2-L2-1	88398894	13.2598	55.2493	31.12	77.8
Prunus mira	GL2	Leaf	GL2_B1-1-1-2-L2-2	88843272	13.3265	55.527	36.29	78.1
Prunus mira	GL2	Leaf	GL2_B1-1-2-1-L1-2	70629296	10.5944	44.1433	30.25	78
Prunus mira	GL2	Leaf	GL2_B1-1-2-2-L1-2	76350734	11.4526	47.7192	33.43	78.1
Prunus mira	GL2	Leaf of Fruit	GL2_B1-2-1-FR	158313236	23.747	98.9458	46.04	78.7
Prunus mira	GL2	Leaf	GL2_B1-2-1-L2-1	78626642	11.794	49.1417	27.74	77.2
Prunus mira	GL2	Leaf of Fruit	GL2_B1-2-2-FR	167193730	25.0791	104.496	50.87	79.1
Prunus mira	GL2	Leaf	GL2_B1-2-2-L2-2	75265732	11.2899	47.0411	26.36	76.8
Prunus mira	GL2	Leaf	GL2_B2-1-L2-2	82518102	12.3777	51.5738	35.1	78.1
Prunus mira	GL2	Leaf	GL2_B2-2-1-1-1-L1-1	87018138	13.0527	54.3863	37.16	78.3
Prunus mira	GL2	Leaf	GL2_B2-2-1-1-1-L2-2	69901088	10.4852	43.6882	29.49	77.5
Prunus mira	GL2	Leaf of Fruit	GL2_B2-2-1-1-2-FR	79705746	11.9559	49.8161	33.78	77.9
Prunus mira	GL2	Leaf	GL2_B2-2-1-1-2-L2	72314970	10.8472	45.1969	27.1	77
Prunus mira	GL2	Leaf	GL2_B2-2-1-2-L1-1	83418376	12.5128	52.1365	34.13	78
Prunus mira	GL2	Leaf	GL2_B2-2-2-L2-2	71854334	10.7782	44.909	27.37	77.2
Prunus mira	GL2	Leaf	GL2_B3-1-1-L1-1	73607938	11.0412	46.005	25.26	77.5
Prunus mira	GL2	Leaf	GL2_B3-1-2-L1-1	100599254	15.0899	62.8745	31.15	78.2
Prunus mira	GL2	Leaf of Fruit	GL2_B3-2-1-FR	73617794	11.0427	46.0111	29.83	77
Prunus mira	GL2	Leaf	GL2_B3-2-1-L4-2	109154048	16.3731	68.2213	43.02	78.8
Prunus mira	GL2	Leaf of Fruit	GL2_B3-2-2-FR	93222854	13.9834	58.2643	37.13	77.7
Prunus mira	GL2	Leaf	GL2_B3-2-2-L4-1	89014944	13.3522	55.6343	35.76	78.2
Prunus mira	GL2	Leaf of Fruit	GL2_B4-1-1-FR1-1	71598760	10.7398	44.7492	27.98	77
Prunus mira	GL2	Leaf of Fruit	GL2_B4-1-1-FR2-1	81662806	12.2494	51.0393	32.43	77.8
Prunus mira	GL2	Leaf of Fruit	GL2_B4-1-1-FR1-2	168149292	25.2224	105.093	47.16	78.9
Prunus mira	GL2	Leaf of Fruit	GL2_B4-1-1-FR2-2	165610432	24.8416	103.507	47.32	78.8
Prunus mira	GL2	Leaf	GL2_B4-1-1-L2-1	79821270	11.9732	49.8883	33.32	78
Prunus mira	GL2	Leaf	GL2_B4-1-1-L2-2	78520154	11.778	49.0751	32.45	77.5
Prunus mira	GL2	Leaf of Fruit	GL2_B4-2-1-FR-1	78741408	11.8112	49.2134	30.48	77.4
Prunus mira	GL2	Leaf of Fruit	GL2_B4-2-1-FR-2	60528004	9.0792	37.83	23.75	76.6
Prunus mira	GL2	Leaf	GL2_B4-2-1-L1	63153164	9.47297	39.4707	24.86	76.6
Prunus mira	GL2	Leaf	GL2_B4-2-1-L2-1	86886346	13.033	54.304	34.84	77.9
Prunus mira	GL2	Leaf	GL2_B4-2-1-L2-2	82066684	12.31	51.2917	28.96	77.3
Prunus mira	GL2	Leaf	GL2_B4-2-2-1-L1-1	80723986	12.1086	50.4525	30.82	77.4
Prunus mira	GL2	Leaf	GL2_B4-2-2-1-L1-2	60734482	9.11017	37.9591	25.05	76.8
Prunus mira	GL2	Leaf	GL2_B4-2-2-2-L1-1	68556106	10.2834	42.8476	28	77.3
Prunus mira	GL2	Leaf	GL2_B5-1-1-L1-1	69452258	10.4178	43.4077	28.01	77
Prunus mira	GL2	Leaf	GL2_B5-1-1-L1-2	76155838	11.4234	47.5974	32.27	78
Prunus mira	GL2	Leaf	GL2_B5-1-1-L1-3	72126306	10.8189	45.0789	25.31	76.8
Prunus mira	GL2	Leaf	GL2_B5-1-2-L1-1	113318198	16.9977	70.8239	45.39	78.7
Prunus mira	GL2	Leaf of Fruit	GL2_B5-2-1-FR1	77675582	11.6513	48.5472	31.74	77.7
Prunus mira	GL2	Leaf of Fruit	GL2_B5-2-1-FR2	73442540	11.0164	45.9016	30.15	77.6
Prunus mira	GL2	Leaf	GL2_B5-2-1-L2-2	74791822	11.2188	46.7449	29.76	77.6
Prunus mira	GL2	Leaf of Fruit	GL2_B5-2-2-1-FR	81358182	12.2037	50.8489	32.69	77.2
Prunus mira	GL2	Leaf	GL2_B5-2-2-1-L2-2	85178822	12.7768	53.2368	35.65	78
Prunus mira	GL2	Leaf of Fruit	GL2_B5-2-2-2-FR	93185514	13.9778	58.2409	32.75	77.3
Prunus mira	GZ	Leaf	GZ-1	71137212	10.6706	44.4608	26.63	78
Prunus mira	GZ	Leaf	GZ-2	76744830	11.5117	47.9655	31.16	78.1
Prunus mira	GZ	Leaf	GZ-3	67977888	10.1967	42.4862	28.83	77.7
Prunus mira	GZ	Leaf	GZ-4	66405252	9.96079	41.5033	27.78	77.9
Prunus mira	GZ	Leaf	GZ-5	92552344	13.8829	57.8452	39.19	78.8
Prunus mira	GZ	Leaf	GZ-6	72233858	10.8351	45.1462	30.44	78.1
Prunus mira	GZ	Leaf	GZ-7	83086666	12.463	51.9292	34.72	78.5
Prunus mira	GZ	Leaf	GZ-8	78428480	11.7643	49.0178	32.83	78.3
Prunus mira	GZ	Leaf	GZ-9	73077592	10.9616	45.6735	29.79	78.1
Prunus mira	GZ	Leaf of Fruit	GZTH-5	75451440	11.3177	47.1572	25.31	77.4
Prunus mira	GZ	Leaf of Fruit	GZTH-8	74132354	11.1199	46.3327	14.28	74.9
Prunus mira	GZ	Leaf of Fruit	GZTH-9*	77707372	11.6561	48.5671	1.26	2.2
Prunus mira	GZ	Leaf of Fruit	GZTH-S1	66912090	10.0368	41.8201	26.77	76.6
Prunus mira	GZ	Leaf of Fruit	GZTH-S2	58133282	8.71999	36.3333	23.27	76.7
Prunus mira	GZ	Leaf of Fruit	GZTH-S3	78503902	11.7756	49.0649	30.14	77.4
Prunus mira	GZ	Leaf of Fruit	GZTH-S4	80480334	12.0721	50.3002	31.55	77.3
Prunus mira	GZ	Leaf of Fruit	GZTH-S5	81047200	12.1571	50.6545	21.68	76.8
Prunus mira	GZ	Leaf of Fruit	GZTH-S7	69888852	10.4833	43.6805	27.46	77.2
Prunus mira	GZ	Leaf of Fruit	GZTH-S8	79582656	11.9374	49.7392	31.59	77.9
Prunus mira	GZ	Leaf of Fruit	GZTH-S9	72168430	10.8253	45.1053	28.62	77.6
Prunus mume	MHG1	Leaf	M1_B1-1-1	97690108	14.6535	61.0563	43.33	85.3
Prunus mume	MHG1	Seed	M1_B1-1-1-2S	79395934	11.9094	49.6225	36.19	84
Prunus mume	MHG1	Leaf	M1_B1-1-2	79843138	11.9765	49.902	35.62	84.7
Prunus mume	MHG1	Seed	M1_B1-1-2-1-2-1S	110608334	16.5913	69.1302	48.35	86
Prunus mume	MHG1	Seed	M1_B1-1-2-2-2S	87298428	13.0948	54.5615	39.83	84.7
Prunus mume	MHG1	Leaf	M1_B1-2-1-1	98257718	14.7387	61.4111	42.55	85.5
Prunus mume	MHG1	Leaf	M1_B1-2-1-2	98186016	14.7279	61.3663	42.04	85.1
Prunus mume	MHG1	Seed	M1_B1-2-1-4S	84468482	12.6703	52.7928	37.82	85.3
Prunus mume	MHG1	Leaf	M1_B1-2-2	96696610	14.5045	60.4354	41.93	85.5
Prunus mume	MHG1	Seed	M1_B1-2-2-1-1S	84201520	12.6302	52.626	38.05	85.2
Prunus mume	MHG1	Seed	M1_B1-2-2-1-2S	85302348	12.7954	53.314	39.3	85.2
Prunus mume	MHG1	Seed	M1_B1-2-2-2-2S	86067788	12.9102	53.7924	38.63	84
Prunus mume	MHG1	Seed	M1_B1-2-2-2-3-1S	95265976	14.2899	59.5412	42.1	84.9
Prunus mume	MHG1	Seed	M1_B1-2-2-3-1S	90665782	13.5999	56.6661	40.45	85
Prunus mume	MHG1	Seed	M1_B1-2-2-3-2S	99639502	14.9459	62.2747	44.63	85
Prunus mume	MHG1	Seed	M1_B1-2-2-3-3-1S	99997600	14.9996	62.4985	45.12	85.6
Prunus mume	MHG1	Leaf	M1_B1-2-T2-1	105339750	15.801	65.8373	43.63	85.4
Prunus mume	MHG1	Leaf	M1_B1-2-T2-2	89753536	13.463	56.096	38.05	84.8
Prunus mume	MHG1	Leaf	M1_B2-1	97112784	14.5669	60.6955	35.33	84.9
Prunus mume	MHG1	Leaf	M1_B2-2	97528666	14.6293	60.9554	42.23	85.6
Prunus mume	MHG1	Seed	M1_B2-2-T1-2S	97245516	14.5868	60.7784	43.18	85.7
Prunus mume	MHG1	Leaf	M1_B2-3-1	99916580	14.9875	62.4479	44.4	85.6
Prunus mume	MHG1	Leaf	M1_B2-3-2	100795058	15.1193	62.9969	44.69	85.8
Prunus mume	MHG1	Leaf	M1_B2-4-1	79348002	11.9022	49.5925	35.82	85.2
Prunus mume	MHG1	Seed	M1_B2-4-1-1S	90299368	13.5449	56.4371	40.27	84.8
Prunus mume	MHG1	Leaf	M1_B2-4-2	100137972	15.0207	62.5862	44.64	85.5
Prunus mume	MHG1	Seed	M1_B2-4-2S	89149506	13.3724	55.7184	40.72	85.1
Prunus mume	MHG1	Leaf	M1_B2-5-1	97176078	14.5764	60.735	44.1	85.6
Prunus mume	MHG1	Seed	M1_B2-5-1-1S	91141952	13.6713	56.9637	41.14	85.3
Prunus mume	MHG1	Seed	M1_B2-5-1-2S	87101574	13.0652	54.4385	40.32	84.9
Prunus mume	MHG1	Leaf	M1_B2-5-2	100558042	15.0837	62.8488	45.2	85.6
Prunus mume	MHG1	Seed	M1_B2-5-2-1S	102447446	15.3671	64.0297	46.15	85.7
Prunus mume	MHG1	Seed	M1_B2-5-2-2S	90040012	13.506	56.275	41.1	85.6
Prunus mume	MHG1	Leaf	M1_B2-5-3	106612422	15.9919	66.6328	47.94	85.9
Prunus mume	MHG1	Leaf	M1_B3-1-1-1	69897962	10.4847	43.6862	31.24	84.5
Prunus mume	MHG1	Leaf	M1_B3-1-1-2	76230974	11.4346	47.6444	31.71	84.4
Prunus mume	MHG1	Leaf	M1_B3-1-1-3	86918430	13.0378	54.324	38.2	84.8
Prunus mume	MHG1	Leaf	M1_B3-1-1-4	79878642	11.9818	49.9242	29.57	83.9
Prunus mume	MHG1	Leaf	M1_B3-1-1-5	88970976	13.3456	55.6069	38.05	85.1
Prunus mume	MHG1	Leaf	M1_B3-1-2	100643976	15.0966	62.9025	42.41	85.6
Prunus mume	MHG1	Leaf	M1_B3-2	109080252	16.362	68.1752	47.02	85.6
Prunus mume	MHG1	Seed	M1_B3-2-1-2-2S	102006698	15.301	63.7542	47.08	85.9
Prunus mume	MHG1	Seed	M1_B3-2-2-1S	89328610	13.3993	55.8304	40.72	85.2
Prunus mume	MHG1	Seed	M1_B3-2-2-4S	95665530	14.3498	59.791	43.19	85.1
Prunus mume	MHG1	Leaf	M1_B3-T1-1	97952354	14.6929	61.2202	43.44	85.5
Prunus mume	MHG1	Leaf	M1_B3-T1-2	99782210	14.9673	62.3639	45	85.9
Prunus mume	MHG1	Root	M1_R10-2	86727772	13.0092	54.2049	31.47	82
Prunus mume	MHG1	Root	M1_R1-1-1	108415012	16.2623	67.7594	30.97	80.2
Prunus mume	MHG1	Root	M1_R11-1-1	104975610	15.7463	65.6098	21.68	82.5
Prunus mume	MHG1	Root	M1_R11-1M	83956136	12.5934	52.4726	26.73	81.7
Prunus mume	MHG1	Root	M1_R1-1-2	115614784	17.3422	72.2592	43.04	82.6
Prunus mume	MHG1	Root	M1_R11-2-1	75284434	11.2927	47.0528	28.15	81.8
Prunus mume	MHG1	Root	M1_R1-1-3	134778398	20.2168	84.2365	55.61	86.6
Prunus mume	MHG1	Root	M1_R1-1Ma	106033818	15.9051	66.2711	43.56	81.7
Prunus mume	MHG1	Root	M1_R1-1Mb	125413482	18.812	78.3834	47.06	84.2
Prunus mume	MHG1	Root	M1_R1-1Mc	106673316	16.001	66.6708	40.24	83
Prunus mume	MHG1	Root	M1_R1-2-2-1	108753686	16.3131	67.9711	40.46	83.4
Prunus mume	MHG1	Root	M1_R1-2-2-2	118256126	17.7384	73.9101	44.86	80.9
Prunus mume	MHG1	Root	M1_R1-2-2-3	135884772	20.3827	84.928	44.74	83.1
Prunus mume	MHG1	Root	M1_R1-2-2Ma	134195262	20.1293	83.872	41.6	83.9
Prunus mume	MHG1	Root	M1_R1-2-2Mb	108320264	16.248	67.7002	44.97	84
Prunus mume	MHG1	Root	M1_R1-2M	109809040	16.4714	68.6307	41.75	85.4
Prunus mume	MHG1	Root	M1_R2-2	97510236	14.6265	60.9439	37.43	82
Prunus mume	MHG1	Root	M1_R2M	113651914	17.0478	71.0324	44.38	82.5
Prunus mume	MHG1	Root	M1_R4-2	83987404	12.5981	52.4921	33.69	84
Prunus mume	MHG1	Root	M1_R6-2-2-1	123817832	18.5727	77.3861	16.88	81.6
Prunus mume	MHG1	Root	M1_R7-1-1	114805010	17.2208	71.7531	26.75	77.7
Prunus mume	MHG1	Root	M1_R7-1-2	112771176	16.9157	70.482	28.85	78.3
Prunus mume	MHG1	Root	M1_R8-1-1	108371078	16.2557	67.7319	32.59	83.8
Prunus mume	MHG1	Root	M1_R8-1-2	94284598	14.1427	58.9279	38	86
Prunus mume	MHG1	Root	M1_R8-2-1	91998322	13.7997	57.499	38.19	84.6
Prunus mume	MHG1	Root	M1_R8-2-2	87098072	13.0647	54.4363	31.34	84.9
Prunus mume	MHG1	Root	M1_R8-2-3	85761904	12.8643	53.6012	33.1	84.1
Prunus mume	MHG1	Root	M1_R8-2-4-1	131064526	19.6597	81.9153	55	86
Prunus mume	MHG1	Root	M1_R8-2-4-2	123903974	18.5856	77.44	51.53	85.4
Prunus mume	MHG1	Root	M1_R8-2-4M	108262104	16.2393	67.6638	45.76	86.3
Prunus mume	MHG1	Root	M1_R8-2Mb	104550758	15.6826	65.3442	41.03	86.1
Prunus mume	MHG1	Root	M1_R9-1Mb	93393558	14.009	58.371	32.33	84.7
Prunus mume	MHG2	Leaf	M2_B1-1-1-1	105505704	15.8259	65.9411	36.65	86.7
Prunus mume	MHG2	Leaf	M2_B1-1-1-2	95982506	14.3974	59.9891	34.41	86.5
Prunus mume	MHG2	Leaf	M2_B1-1-1-3	96540728	14.4811	60.338	33.67	86.4
Prunus mume	MHG2	Leaf	M2_B1-1-1-4	98604710	14.7907	61.6279	35.43	86.4
Prunus mume	MHG2	Leaf	M2_B1-1-2-1	119807084	17.9711	74.8794	48.34	87.1
Prunus mume	MHG2	Leaf	M2_B1-1-2-2	101522090	15.2283	63.4513	41.79	87.1
Prunus mume	MHG2	Leaf	M2_B1-2-1	101293948	15.1941	63.3087	41.88	87
Prunus mume	MHG2	Leaf	M2_B1-2-2-1	90941970	13.6413	56.8387	39.64	87.1
Prunus mume	MHG2	Leaf	M2_B1-2-2-2	103748038	15.5622	64.8425	42.72	87.2
Prunus mume	MHG2	Leaf	M2_B1-2-2-T1	94136096	14.1204	58.8351	36.39	86.6
Prunus mume	MHG2	Leaf	M2_B1-2-T1	91851710	13.7778	57.4073	35.36	87
Prunus mume	MHG2	Leaf	M2_B1-T1	99048458	14.8573	61.9053	42.61	86.7
Prunus mume	MHG2	Leaf	M2_B2-1-1-1	93732664	14.0599	58.5829	44.56	87.2
Prunus mume	MHG2	Leaf	M2_B2-1-1-2	99378126	14.9067	62.1113	41.98	87.1
Prunus mume	MHG2	Leaf	M2_B2-1-2-1	91900480	13.7851	57.4378	40.68	87
Prunus mume	MHG2	Leaf	M2_B2-1-2-T1	109269426	16.3904	68.2934	45.77	87.2
Prunus mume	MHG2	Leaf	M2_B2-1-2-T2	74419918	11.163	46.5124	27.35	85.5
Prunus mume	MHG2	Leaf	M2_B2-1-2-T3	102352766	15.3529	63.9705	36.49	86.5
Prunus mume	MHG2	Leaf	M2_B2-2-1-1-1	90872254	13.6308	56.7952	36.58	86.7
Prunus mume	MHG2	Leaf	M2_B2-2-1-1-2	97437742	14.6157	60.8986	38.76	87
Prunus mume	MHG2	Leaf	M2_B2-2-1-2-1	97238300	14.5857	60.7739	42.28	87.2
Prunus mume	MHG2	Leaf	M2_B2-2-1-2-2	106691122	16.0037	66.682	42.31	86.7
Prunus mume	MHG2	Leaf	M2_B2-2-1-3	88021514	13.2032	55.0134	39.81	87
Prunus mume	MHG2	Leaf	M2_B2-2-2-1	105095784	15.7644	65.6849	44.55	86.9
Prunus mume	MHG2	Leaf	M2_B2-2-2-2	91396096	13.7094	57.1226	41.09	87
Prunus mume	MHG2	Leaf	M2_B2-2-2-3-1	103488698	15.5233	64.6804	42.52	87
Prunus mume	MHG2	Leaf	M2_B2-2-2-3-2	99175746	14.8764	61.9848	36.95	86.6
Prunus mume	MHG2	Leaf	M2_B2-2-2-3-3-1	109051558	16.3577	68.1572	45.37	87.4
Prunus mume	MHG2	Leaf	M2_B2-2-2-3-3-2	109015132	16.3523	68.1345	43.62	87.2
Prunus mume	MHG2	Leaf	M2_B2-2-2-3-3-3	84901960	12.7353	53.0637	34.39	86.8
Prunus mume	MHG2	Leaf	M2_B2-2-2-3-3-4	100845460	15.1268	63.0284	38.44	86.8
Prunus mume	MHG2	Leaf	M2_B2-2-2-3-3-5	91239764	13.686	57.0249	33.66	86.2
Prunus mume	MHG2	Leaf	M2_B2-2-T1	93385338	14.0078	58.3658	29.89	86
Prunus mume	MHG2	Leaf	M2_T1-1*	92816386	13.9225	58.0102	38.17	85.7
Prunus mume	MHG2	Leaf	M2_T1-2*	75034216	11.2551	46.8964	24.65	84.2
Prunus persica	DHQ1	Leaf	DHQ1_B1-10-L1	96751512	14.5127	60.4697	45.01	92.7
Prunus persica	DHQ1	Leaf	DHQ1_B1-10-L2	109784454	16.4677	68.6153	51.1	92.5
Prunus persica	DHQ1	Leaf	DHQ1_B1-11-L1	78576522	11.7865	49.1103	36.43	92.2
Prunus persica	DHQ1	Leaf	DHQ1_B1-11-L2	126139816	18.921	78.8374	57.92	92.9
Prunus persica	DHQ1	Leaf	DHQ1_B1-12-L1	88468546	13.2703	55.2928	39.46	92.1
Prunus persica	DHQ1	Leaf	DHQ1_B1-12-L2	110785912	16.6179	69.2412	50.87	92.6
Prunus persica	DHQ1	Leaf	DHQ1_B1-13-L1	88089622	13.2134	55.056	41.37	92.4
Prunus persica	DHQ1	Leaf	DHQ1_B1-13-L2	117270022	17.5905	73.2938	52.67	92.8
Prunus persica	DHQ1	Leaf	DHQ1_B1-14-L1	80614388	12.0922	50.384	37.69	92
Prunus persica	DHQ1	Leaf	DHQ1_B1-14-L2	107275002	16.0913	67.0469	50.16	92.9
Prunus persica	DHQ1	Leaf	DHQ1_B1-15-L1	82355132	12.3533	51.472	38.74	92.4
Prunus persica	DHQ1	Leaf	DHQ1_B1-16-L1	84196120	12.6294	52.6226	39.48	92.2
Prunus persica	DHQ1	Leaf	DHQ1_B1-1-L1	101199162	15.1799	63.2495	47.59	92.5
Prunus persica	DHQ1	Leaf	DHQ1_B1-1-L2	71181522	10.6772	44.4885	33.67	91.7
Prunus persica	DHQ1	Leaf	DHQ1_B1-3-L1	70083920	10.5126	43.8025	34.4	92.3
Prunus persica	DHQ1	Leaf	DHQ1_B1-3-L2	77916000	11.6874	48.6975	36.37	92.3
Prunus persica	DHQ1	Leaf	DHQ1_B1-4-L1	80057794	12.0087	50.0361	39.11	92.5
Prunus persica	DHQ1	Leaf	DHQ1_B1-4-L2	74136644	11.1205	46.3354	35.24	92.6
Prunus persica	DHQ1	Leaf	DHQ1_B1-5-L1	69529970	10.4295	43.4562	34.67	92.6
Prunus persica	DHQ1	Leaf	DHQ1_B1-5-L2	80571234	12.0857	50.357	38.64	92.4
Prunus persica	DHQ1	Leaf	DHQ1_B1-6-L1	89118934	13.3678	55.6993	43.62	92.8
Prunus persica	DHQ1	Leaf	DHQ1_B1-6-L2	99849860	14.9775	62.4062	46.39	92.8
Prunus persica	DHQ1	Leaf	DHQ1_B1-7-L1	100728268	15.1092	62.9552	49.28	93
Prunus persica	DHQ1	Leaf	DHQ1_B1-7-L2	110583012	16.5875	69.1144	51.83	93
Prunus persica	DHQ1	Leaf	DHQ1_B1-8-L1	105009666	15.7514	65.631	51.01	92.8
Prunus persica	DHQ1	Leaf	DHQ1_B1-8-L2	101244108	15.1866	63.2776	47.51	93
Prunus persica	DHQ1	Leaf	DHQ1_B1-9-L1	117332364	17.5999	73.3327	52.29	92.9
Prunus persica	DHQ1	Leaf	DHQ1_B1-9-L2	96302682	14.4454	60.1892	45.55	92.8
Prunus persica	DHQ1	Leaf	DHQ1_B1-L1	95296776	14.2945	59.5605	44.96	92.6
Prunus persica	DHQ1	Leaf	DHQ1_B2-10-L1	72983078	10.9475	45.6144	34.2	92
Prunus persica	DHQ1	Leaf	DHQ1_B2-10-L2	73342134	11.0013	45.8388	33.16	91.7
Prunus persica	DHQ1	Leaf	DHQ1_B2-11-L1	90347846	13.5522	56.4674	42.04	92.5
Prunus persica	DHQ1	Leaf	DHQ1_B2-11-L2	108816628	16.3225	68.0104	49.87	92.8
Prunus persica	DHQ1	Leaf	DHQ1_B2-12-L1	91065656	13.6598	56.916	43.05	92.3
Prunus persica	DHQ1	Leaf	DHQ1_B2-12-L2	95761892	14.3643	59.8512	44.62	92.7
Prunus persica	DHQ1	Leaf	DHQ1_B2-13-L1	88979714	13.347	55.6123	41.92	92.5
Prunus persica	DHQ1	Leaf	DHQ1_B2-13-L2	79540594	11.9311	49.7129	37.44	92.5
Prunus persica	DHQ1	Leaf	DHQ1_B2-14-L1	87898760	13.1848	54.9367	40.47	92.5
Prunus persica	DHQ1	Leaf	DHQ1_B2-14-L2	78138278	11.7207	48.8364	36.45	92
Prunus persica	DHQ1	Leaf	DHQ1_B2-15-L1	88131850	13.2198	55.0824	40.39	92.3
Prunus persica	DHQ1	Leaf	DHQ1_B2-15-L2	115596022	17.3394	72.2475	54.28	92.9
Prunus persica	DHQ1	Leaf	DHQ1_B2-16-L1	82894522	12.4342	51.8091	39.15	92.4
Prunus persica	DHQ1	Leaf	DHQ1_B2-16-L2	77916234	11.6874	48.6976	35.72	92
Prunus persica	DHQ1	Leaf	DHQ1_B2-1-L1	85130754	12.7696	53.2067	40.88	92.7
Prunus persica	DHQ1	Leaf	DHQ1_B2-1-L2	65447450	9.81712	40.9047	32.04	92.2
Prunus persica	DHQ1	Leaf	DHQ1_B2-2-L1	84319808	12.648	52.6999	39.85	92.6
Prunus persica	DHQ1	Leaf	DHQ1_B2-2-L2	68484492	10.2727	42.8028	33.99	92.4
Prunus persica	DHQ1	Leaf	DHQ1_B2-3-L1	88247296	13.2371	55.1546	41.87	92.2
Prunus persica	DHQ1	Leaf	DHQ1_B2-3-L2	95845818	14.3769	59.9036	47.83	92.8
Prunus persica	DHQ1	Leaf	DHQ1_B2-4-L1	103789734	15.5685	64.8686	49.33	92.8
Prunus persica	DHQ1	Leaf	DHQ1_B2-4-L2	80392522	12.0589	50.2453	40.01	92.4
Prunus persica	DHQ1	Leaf	DHQ1_B2-5-L1	80663840	12.0996	50.4149	38.68	92.5
Prunus persica	DHQ1	Leaf	DHQ1_B2-5-L2	79041504	11.8562	49.4009	39.25	92.6
Prunus persica	DHQ1	Leaf	DHQ1_B2-6-L1	87121426	13.0682	54.4509	41.53	92.9
Prunus persica	DHQ1	Leaf	DHQ1_B2-6-L2	66503032	9.97545	41.5644	32.79	91.7
Prunus persica	DHQ1	Leaf	DHQ1_B2-7-L1	94427350	14.1641	59.0171	45.41	92.6
Prunus persica	DHQ1	Leaf	DHQ1_B2-7-L2	79582462	11.9374	49.739	39.11	92.1
Prunus persica	DHQ1	Leaf	DHQ1_B2-8-L1	79334848	11.9002	49.5843	38.45	92.2
Prunus persica	DHQ1	Leaf	DHQ1_B2-8-L2	80747174	12.1121	50.467	40.32	92.4
Prunus persica	DHQ1	Leaf	DHQ1_B2-9-L1	109089988	16.3635	68.1812	51.85	93
Prunus persica	DHQ1	Leaf	DHQ1_B2-9-L2	72931886	10.9398	45.5824	34	92.2
Prunus persica	DHQ1	Leaf	DHQ1_B2-L1	121158416	18.1738	75.724	56.53	93.1
Prunus persica	DHQ1	Leaf	DHQ1_B3-1-L1	106565706	15.9849	66.6036	48.43	92.7
Prunus persica	DHQ1	Leaf	DHQ1_B3-2-L1	106239654	15.9359	66.3998	49.28	92.7
Prunus persica	DHQ1	Leaf	DHQ1_B3-3-L1	118178412	17.7268	73.8615	54.27	92.8
Prunus persica	DHQ1	Leaf	DHQ1_B3-4-L1	119553508	17.933	74.7209	55.7	92.6
Prunus persica	DHQ1	Leaf	DHQ1_B3-5-L1	133778158	20.0667	83.6113	63.58	93.1
Prunus persica	DHQ1	Leaf	DHQ1_B3-L1	98802722	14.8204	61.7517	46.16	92.7
Prunus persica	DHQ1	Leaf	DHQ1_B4-1-1-L1	86222808	12.9334	53.8893	42.4	92.5
Prunus persica	DHQ1	Leaf	DHQ1_B4-1-2-L1	78610042	11.7915	49.1313	38.47	92.5
Prunus persica	DHQ1	Leaf	DHQ1_B4-1-3-L1	92122946	13.8184	57.5768	44.88	92.5
Prunus persica	DHQ1	Leaf	DHQ1_B4-1-4-L1	81454850	12.2182	50.9093	38.46	92.5
Prunus persica	DHQ1	Leaf	DHQ1_B4-1-L1	106157590	15.9236	66.3485	51.63	92.7
Prunus persica	DHQ1	Leaf	DHQ1_B4-2-L1	91926378	13.789	57.454	44.48	92.6
Prunus persica	DHQ1	Leaf	DHQ1_B4-3-L1	107913776	16.1871	67.4461	52.09	92.6
Prunus persica	HY1	Leaf	HY1_B1-1-1	78589820	11.7885	49.1186	36.15	90.3
Prunus persica	HY1	Leaf	HY1_B1-1-2-1	74748350	11.2123	46.7177	34.86	89.8
Prunus persica	HY1	Flower	HY1_B1-1-2-2-H1-2	85183120	12.7775	53.2395	39.3	89.2
Prunus persica	HY1	Flower	HY1_B1-1-2-2-H1-3*	79601670	11.9403	49.751	21.53	1.8
Prunus persica	HY1	Flower	HY1_B1-1-2-2-H1-4	98653346	14.798	61.6583	30.46	80
Prunus persica	HY1	Flower	HY1_B1-1-2-2-H1-5*	104716672	15.7075	65.4479	3.26	2.3
Prunus persica	HY1	Flower	HY1_B1-1-2-2-H1-6*	94655020	14.1983	59.1594	15.85	3.6
Prunus persica	HY1	Flower	HY1_B1-1-2-2-H2-1	102600342	15.3901	64.1252	50.12	90.3
Prunus persica	HY1	Flower	HY1_B1-1-2-2-H2-2	107347120	16.1021	67.0919	46.82	89.7
Prunus persica	HY1	Leaf	HY1_B2-3	81682690	12.2524	51.0517	38.19	90.4
Prunus persica	HY1	Leaf	HY1_B1-2-1-L1-1	85654596	12.8482	53.5341	43.77	90.6
Prunus persica	HY1	Leaf	HY1_B1-2-1-L1-2	90947088	13.6421	56.8419	46.78	90.5
Prunus persica	HY1	Leaf	HY1_B1-2-1-L1-3	81754474	12.2632	51.0965	42.22	90.4
Prunus persica	HY1	Leaf	HY1_B1-2-1-L1-4	108411358	16.2617	67.7571	55.91	91
Prunus persica	HY1	Leaf	HY1_B1-2-1-L1-5	93476418	14.0215	58.4228	48.64	90.8
Prunus persica	HY1	Leaf	HY1_B1-2-1-L1-6	77942936	11.6914	48.7143	39.02	90
Prunus persica	HY1	Leaf	HY1_B1-2-1-L1-7	77737702	11.6607	48.5861	38.64	90
Prunus persica	HY1	Leaf	HY1_B1-2-1-L1-8	71068606	10.6603	44.4179	35.35	89.8
Prunus persica	HY1	Leaf	HY1_B1-2-2	89716136	13.4574	56.0726	41.76	90.6
Prunus persica	HY1	Leaf	HY1_B2-1	81892902	12.2839	51.1831	34.91	90.3
Prunus persica	HY1	Leaf	HY1_B2-1-T1	74291646	11.1437	46.4323	31.9	90
Prunus persica	HY1	Leaf	HY1_B2-2-1-L1	61020786	9.15312	38.138	29.22	90.8
Prunus persica	HY1	Leaf	HY1_B2-2-1-L3-1	84009270	12.6014	52.5058	42.55	90.9
Prunus persica	HY1	Leaf	HY1_B2-2-1-L3-10	2095517290	314.328	1309.7	1028.41	93.9
Prunus persica	HY1	Leaf	HY1_B2-2-1-L3-2	2176540780	326.481	1360.34	1029	93.9
Prunus persica	HY1	Leaf	HY1_B2-2-1-L3-3	107813992	16.1721	67.3837	54.61	91.6
Prunus persica	HY1	Leaf	HY1_B2-2-1-L3-4	82724262	12.4086	51.7027	41.97	90.9
Prunus persica	HY1	Leaf	HY1_B2-2-1-L3-5	86941814	13.0413	54.3386	43.69	90.9
Prunus persica	HY1	Leaf	HY1_B2-2-1-L3-6	2171915328	325.787	1357.45	1076.29	93.9
Prunus persica	HY1	Leaf	HY1_B2-2-1-L3-7	62214382	9.33216	38.884	31.94	90.2
Prunus persica	HY1	Leaf	HY1_B2-2-2-1	82578776	12.3868	51.6117	36.64	90.4
Prunus persica	HY1	Flower	HY1_B2-2-2-H1-1	122655636	18.3983	76.6598	54.52	90.6
Prunus persica	HY1	Flower	HY1_B2-2-2-H1-2	116435984	17.4654	72.7725	53.18	90.4
Prunus persica	HY1	Flower	HY1_B2-2-2-H1-3	99150194	14.8725	61.9689	43.68	90
Prunus persica	HY1	Flower	HY1_B2-2-2-H1-6	107734416	16.1602	67.334	39.7	89.1
Prunus persica	HY1	Flower	HY1_B2-2-2-H2-1*	116896018	17.5344	73.06	2.84	7.5
Prunus persica	HY1	Flower	HY1_B2-2-2-H2-2	90719024	13.6079	56.6994	39.66	83.6
Prunus persica	HY1	Leaf	HY1_T1	95687862	14.3532	59.8049	40.34	90.5
Prunus persica	HY2	Leaf	HY2_B1-1-L1	75025036	11.2538	46.8906	33.49	92.3
Prunus persica	HY2	Flower	HY2_B1-1-H1	95054650	14.2582	59.4092	42.63	93.3
Prunus persica	HY2	Leaf	HY2_B1-2-1-1	76206290	11.4309	47.6289	34.25	92.8
Prunus persica	HY2	Leaf	HY2_B1-2-1-2-1-L1	96045582	14.4068	60.0285	45.42	93.9
Prunus persica	HY2	Leaf	HY2_B1-2-1-2-2-L1	88637442	13.2956	55.3984	41.09	93.9
Prunus persica	HY2	Leaf	HY2_B1-2-1-3-L1	96764920	14.5147	60.4781	44.98	93.9
Prunus persica	HY2	Leaf	HY2_B1-2-2-1-L1	75941514	11.3912	47.4634	34.38	92.5
Prunus persica	HY2	Flower	HY2_B1-2-2-1-H1-1	90994650	13.6492	56.8717	40.6	93.8
Prunus persica	HY2	Flower	HY2_B1-2-2-1-H1-2	73623430	11.0435	46.0146	32.81	93.3
Prunus persica	HY2	Flower	HY2_B1-2-2-1-H1-3	153528458	23.0293	95.9553	66.13	94.2
Prunus persica	HY2	Flower	HY2_B1-2-2-2-H1	69987724	10.4982	43.7423	31.49	91.5
Prunus persica	HY2	Leaf	HY2_B1-2-2-2-L1	81442142	12.2163	50.9013	38.2	93.7
Prunus persica	HY2	Leaf	HY2_B1-3-1-2-L1	90203820	13.5306	56.3774	39.47	93
Prunus persica	HY2	Flower	HY2_B1-3-1-2-H1	91152398	13.6729	56.9702	40.57	93.6
Prunus persica	HY2	Leaf	HY2_B1-3-1-3-L1	91918536	13.7878	57.4491	42.65	93.9
Prunus persica	HY2	Flower	HY2_B1-3-1-3-H1	85780778	12.8671	53.613	38.48	93.3
Prunus persica	HY2	Flower	HY2_B1-3-1-3-H2	87528742	13.1293	54.7055	39.62	93.7
Prunus persica	HY2	Leaf	HY2_B1-3-1-4-L1	86594432	12.9892	54.1215	40.05	93.7
Prunus persica	HY2	Leaf	HY2_B2-1-1-1-L1	94786306	14.2179	59.2414	41.85	93
Prunus persica	HY2	Flower	HY2_B2-1-1-1-H1	215758706	32.3638	134.849	92.26	94.6
Prunus persica	HY2	Leaf	HY2_B2-1-1-3-L1	151297184	22.6946	94.5607	69.68	94.3
Prunus persica	HY2	Leaf	HY2_B2-1-2-1-1-L1	70951374	10.6427	44.3446	31.19	92.1
Prunus persica	HY2	Flower	HY2_B2-1-2-1-1-H1	163683090	24.5525	102.302	70.05	94.3
Prunus persica	HY2	Flower	HY2_B2-1-2-1-3-H1	173819396	26.0729	108.637	75.42	94.2
Prunus persica	HY2	Flower	HY2_B2-1-2-1-3-H2	182833610	27.425	114.271	78.98	94.5
Prunus persica	HY2	Flower	HY2_B2-1-2-1-3-H3	174362416	26.1544	108.977	74.83	94.4
Prunus persica	HY2	Leaf	HY2_B2-1-T1-L1	146719974	22.008	91.7	68.32	94.2
Prunus persica	HY2	Leaf	HY2_B2-2-L1	78333900	11.7501	48.9587	35.04	92.6
Prunus persica	HY2	Leaf	HY2_B2-T1-L1	85562628	12.8344	53.4766	37.08	93.1
Prunus persica	Maoping	Leaf	PM_1-1	94359874	14.154	58.9749	28.02	88.7
Prunus persica	Maoping	Leaf	PM_1-2	95040860	14.2561	59.4005	31.65	89.2
Prunus persica	Maoping	Leaf	PM_1-3	91497960	13.7247	57.1862	31.46	88.9
Prunus persica	Maoping	Leaf	PM_1-4	95728796	14.3593	59.8305	30.95	89
Prunus persica	Maoping	Leaf	PM_1-5	92133012	13.82	57.5831	29.89	88.7
Prunus persica	Maoping	Leaf	PM_2-1	85696454	12.8545	53.5603	29.24	88.8
Prunus persica	Maoping	Leaf	PM_2-2	88746642	13.312	55.4667	29.64	88.5
Prunus persica	Maoping	Leaf	PM_2-3	97096522	14.5645	60.6853	30.91	88.9
Prunus persica	Maoping	Leaf	PM_2-4	100044278	15.0066	62.5277	40.27	89.8
Prunus persica	Maoping	Leaf	PM_2-5	94876254	14.2314	59.2977	37.46	89.7
Prunus persica	Maoping	Leaf	PM_3-1	99643692	14.9466	62.2773	36.24	89.2
Prunus persica	Maoping	Leaf	PM_3-2	109924496	16.4887	68.7028	41.56	89.7
Prunus persica	Maoping	Leaf	PM_3-3	105588176	15.8382	65.9926	41.8	89.8
Prunus persica	Maoping	Leaf	PM_3-4	102855130	15.4283	64.2845	41.55	89.6
Prunus persica	Maoping	Leaf	PM_T-1	94352174	14.1528	58.9701	25.45	87.8
Prunus persica	Maoping	Leaf	PM_T-2	90464488	13.5697	56.5403	34.56	89.1
Prunus persica	NJAU1	Leaf	N1_B1-1-1	82004456	12.3007	51.2528	36.28	91.3
Prunus persica	NJAU1	Leaf	N1_B1-2-1	89506672	13.426	55.9417	38.84	91.4
Prunus persica	NJAU1	Leaf	N1_B1-3-T1	70684850	10.6027	44.178	30.88	90.9
Prunus persica	NJAU1	Leaf	N1_B1-T1	69723032	10.4585	43.5769	31.32	91.3
Prunus persica	NJAU1	Leaf	N1_B1-T2-1	89138556	13.3708	55.7116	38.43	91.2
Prunus persica	NJAU1	Leaf	N1_B1-T4-1	89116138	13.3674	55.6976	39.87	91.4
Prunus persica	NJAU1	Leaf	N1_B1-T5-1	80875146	12.1313	50.547	36.79	91.7
Prunus persica	NJAU1	Leaf	N1_B2-1-1-1	69069206	10.3604	43.1683	30.61	90.8
Prunus persica	NJAU1	Leaf	N1_B2-1-1-4	77793990	11.6691	48.6212	35.55	91.5
Prunus persica	NJAU1	Leaf	N1_B2-1-1-T1	100227420	15.0341	62.6421	44.82	91.5
Prunus persica	NJAU1	Leaf	N1_B2-1-1-T4	102179952	15.327	63.8625	43.62	91.7
Prunus persica	NJAU1	Leaf	N1_B2-1-2-1	75595966	11.3394	47.2475	32.96	90.9
Prunus persica	NJAU1	Leaf	N1_B2-1-2-3	92893246	13.934	58.0583	40.56	91.5
Prunus persica	NJAU1	Leaf	N1_B2-1-2-T1	88134330	13.2201	55.084	37.64	91.4
Prunus persica	NJAU1	Leaf	N1_B2-1-2-T4	99336870	14.9005	62.0855	42.66	91.6
Prunus persica	NJAU1	Leaf	N1_B2-2-1-1	106175232	15.9263	66.3595	47.33	91.8
Prunus persica	NJAU1	Leaf	N1_B2-2-1-2-1	81059586	12.1589	50.6622	36.27	91.2
Prunus persica	NJAU1	Leaf	N1_B2-2-1-2-3	88741636	13.3112	55.4635	38.88	91.2
Prunus persica	NJAU1	Leaf	N1_B2-2-1-3-T1	96829264	14.5244	60.5183	40.5	91.5
Prunus persica	NJAU1	Leaf	N1_B2-2-1-T2-1	84436276	12.6654	52.7727	38.39	91.3
Prunus persica	NJAU1	Leaf	N1_B2-2-1-T3	81070396	12.1606	50.669	35.3	91.3
Prunus persica	NJAU1	Leaf	N1_B2-2-2-1-1-1	95370282	14.3055	59.6064	42.95	91.3
Prunus persica	NJAU1	Leaf	N1_B2-2-2-1-2-1	83846426	12.577	52.404	37.57	91.3
Prunus persica	NJAU1	Leaf	N1_B2-2-2-2	73452276	11.0178	45.9077	33.03	89.6
Prunus persica	NJAU1	Leaf	N1_B2-2-3-T1	92350220	13.8525	57.7189	42.05	91.7
Prunus persica	NJAU1	Leaf	N1_B2-2-3-T4	68806428	10.321	43.004	31.37	90.4
Prunus persica	NJAU2	Leaf	N2_B1-1	71251634	10.6877	44.5323	31.93	88.6
Prunus persica	NJAU2	Leaf	N2_B1-3	75928440	11.3893	47.4553	33.75	88.8
Prunus persica	NJAU2	Leaf	N2_B2-1	85584594	12.8377	53.4904	37.86	88.8
Prunus persica	NJAU2	Leaf	N2_B2-2	78632550	11.7949	49.1453	35.22	88.7
Prunus persica	NJAU2	Leaf	N2_B3-1	71190780	10.6786	44.4942	33.65	88.8
Prunus persica	NJAU2	Leaf	N2_B3-2	73536850	11.0305	45.9605	33.38	88.7
Prunus persica	NJAU2	Leaf	N2_B4-1	79329006	11.8994	49.5806	35.52	88.9
Prunus persica	NJAU2	Leaf	N2_B4-2	77234122	11.5851	48.2713	34.3	88.9
Prunus persica	PXL	Leaf	PXL_B1-1L1	81578260	12.2367	50.9864	34.86	91.7
Prunus persica	PXL	Leaf	PXL_B1-2L1	77354288	11.6031	48.3464	32.92	91.3
Prunus persica	PXL	Leaf	PXL_B2-1-1L1	73491942	11.0238	45.9325	30.82	91.1
Prunus persica	PXL	Leaf	PXL_B2-1-1L2	76706890	11.506	47.9418	32.52	91.5
Prunus persica	PXL	Leaf	PXL_B2-1-1L3	83934764	12.5902	52.4592	35.91	91.7
Prunus persica	PXL	Leaf	PXL_B2-1-2L1	71900808	10.7851	44.938	31.12	91.1
Prunus persica	PXL	Leaf	PXL_B2-1-2L2	81214034	12.1821	50.7588	35.4	91.6
Prunus persica	PXL	Leaf	PXL_B2-1-2L3	96594088	14.4891	60.3713	41.69	91.9
Prunus persica	PXL	Leaf	PXL_B2-1-3L1	73379398	11.0069	45.8621	31.12	91.3
Prunus persica	PXL	Leaf	PXL_B2-1-4L1	97088058	14.5632	60.68	39.35	91.5
Prunus persica	PXL	Leaf	PXL_B2-1-5L1	87115450	13.0673	54.4472	39.6	91.9
Prunus persica	PXL	Leaf	PXL_B2-2-1L1	89889094	13.4834	56.1807	39.53	91.8
Prunus persica	PXL	Leaf	PXL_B2-2-2L1	88856902	13.3285	55.5356	37.89	91.8
Prunus persica	PXL	Leaf	PXL_B3-1L1	104650344	15.6976	65.4065	45.25	92
Prunus persica	PXL	Leaf	PXL_B3-2L1	128179496	19.2269	80.1122	43.92	91.8
Prunus persica	PXL	Leaf	PXL_B4-1L1	77271760	11.5908	48.2948	27.06	90.5
Prunus persica	PXL	Leaf	PXL_B4-2L1	83584282	12.5376	52.2402	36.46	91.7
Prunus persica	PXL	Leaf	PXL_B4-2L2	79869800	11.9805	49.9186	34.75	91.6
Prunus persica	PXL	Leaf	PXL_B4-2L3	84054510	12.6082	52.5341	36.84	91.3
Prunus persica	PXL	Leaf	PXL_B4-3L1	92887238	13.9331	58.0545	39.19	91.5
Prunus persica	PXL	Leaf	PXL_B4-3L2	94824620	14.2237	59.2654	38.86	91.8
Prunus persica	PXL	Leaf	PXL_B4-3L3	90407614	13.5611	56.5048	31.84	91.1
Prunus persica	PXL	Leaf	PXL_B5-1-1L1	98052878	14.7079	61.283	39	91.8
Prunus persica	PXL	Leaf	PXL_B5-1-1L2	89313188	13.397	55.8207	35.8	91.6
Prunus persica	PXL	Leaf	PXL_B5-1-1L3	86527782	12.9792	54.0799	34.83	91.7
Prunus persica	PXL	Leaf	PXL_B5-1-2L1	82920938	12.4381	51.8256	33.88	91.5
Prunus persica	PXL	Leaf	PXL_B5-1-2L2	67531948	10.1298	42.2075	27.5	91
Prunus persica	PXL	Leaf	PXL_B5-1-2L3	72065486	10.8098	45.0409	29.1	91.1
Prunus persica	PXL	Leaf	PXL_B5-1-3L1	86840464	13.0261	54.2753	38.04	90.8
Prunus persica	PXL	Leaf	PXL_B6-1-1L1	98550818	14.7826	61.5943	40.3	91.7
Prunus persica	PXL	Leaf	PXL_B6-1-2L1	94337782	14.1507	58.9611	38.99	91.7
Prunus persica	PXL	Leaf	PXL_B6-2-1L1	89977486	13.4966	56.2359	32.32	91.4
Prunus persica	PXL	Leaf	PXL_B6-2-2L1	90064200	13.5096	56.2901	31.97	91.6
Prunus persica	PXL	Leaf	PXL_B6-3-1L1	84288388	12.6433	52.6802	30.14	91.1
Prunus persica	PXL	Leaf	PXL_B6-3-2L1	76605518	11.4908	47.8784	28.41	90.8
Prunus persica	PXL	Bark	PXL_BA1	98131138	14.7197	61.332	30.29	91.6
Prunus persica	PXL	Root	PXL_R2-2-1	84587300	12.6881	52.8671	32.33	91.1
Prunus persica	PXL	Root	PXL_R1-2M	92939442	13.9409	58.0872	34.09	89.8
Prunus persica	PXL	Root	PXL_R1-1	108265046	16.2398	67.6657	39.74	91
Prunus persica	PXL	Root	PXL_R1-2-1	89138670	13.3708	55.7117	32.05	91.7
Prunus persica	PXL	Root	PXL_R1-2-2	99808988	14.9713	62.3806	38.02	92.2
Prunus persica	PXL	Root	PXL_R1-2-3	92745820	13.9119	57.9661	35.8	90.9
Prunus persica	PXL	Root	PXL_R1-2-4	93371142	14.0057	58.357	34.91	90.5
Prunus persica	PXL	Root	PXL_R1-2-5	101823686	15.2736	63.6398	39.64	91.5
Prunus persica	PXL	Root	PXL_R2-1-1	100547048	15.0821	62.8419	38.18	91.7
Prunus persica	PXL	Root	PXL_R4	90946336	13.642	56.8415	26.09	91.1
Prunus persica	PXL	Root	PXL_R2-1-2	74878782	11.2318	46.7992	25.91	89.6
Prunus persica	PXL	Root	PXL_R3	89155828	13.3734	55.7224	24.57	90.9
Prunus persica	PXL	Root	PXL_R2-2-2	81273620	12.191	50.796	23.86	90.7
Salix suchowensis	YAF1	Leaf	24_L1	136454310	20.4681	42.642	31.19	63.8
Salix suchowensis	YAF1	Leaf	24_L2	128043374	19.2065	40.0136	28.65	64
Salix suchowensis	YAF1	Leaf	24_L3	163461372	24.5192	51.0817	36.66	66.3
Salix suchowensis	YAF1	Root	24_R1	105402518	15.8104	32.9383	9.78	51.7
Salix suchowensis	YAF1	Root	24_R2	92063088	13.8095	28.7697	9.4	41
Salix suchowensis	YAF1	Root	24_R3	122037296	18.3056	38.1367	16.25	47.8
Salix suchowensis	YAF1	Leaf	25_L1	148152456	22.2229	46.2976	33.04	64.7
Salix suchowensis	YAF1	Leaf	25_L2	150079576	22.5119	46.8999	34.52	65
Salix suchowensis	YAF1	Leaf	25_L3	112570462	16.8856	35.1783	26.01	63.3
Salix suchowensis	YAF1	Root	25_R1	110678166	16.6017	34.5869	7.14	47.6
Salix suchowensis	YAF1	Root	25_R2	111094056	16.6641	34.7169	16.01	59.2
Salix suchowensis	YAF1	Root	25_R3	109272862	16.3909	34.1478	12.02	53
Salix suchowensis	YAF1	Leaf	34_L1	127314754	19.0972	39.7859	30.44	64.5
Salix suchowensis	YAF1	Leaf	34_L3	123664362	18.5497	38.6451	28.72	65.6
Salix suchowensis	YAF1	Leaf	34_L4	131784866	19.7677	41.1828	29.47	64
Salix suchowensis	YAF1	Root	34_R1	124842290	18.7263	39.0132	18.61	49.4
Salix suchowensis	YAF1	Root	34_R2	121985776	18.2979	38.1206	20.85	51.5
Salix suchowensis	YAF1	Root	34_R3	115796892	17.3695	36.1865	19.34	49
Salix suchowensis	YAF1	Leaf	35_L1	125612724	18.8419	39.254	29.22	64.5
Salix suchowensis	YAF1	Leaf	35_L2	134772794	20.2159	42.1165	30.82	66.3
Salix suchowensis	YAF1	Leaf	35_L3	120870908	18.1306	37.7722	27.72	65.6
Salix suchowensis	YAF1	Root	35_R1	109887024	16.4831	34.3397	6	40.3
Salix suchowensis	YAF1	Root	35_R2	120981758	18.1473	37.8068	15.6	49.3
Salix suchowensis	YAF1	Root	35_R3	124798134	18.7197	38.9994	13.14	44.9
Salix suchowensis	YAF1	Leaf	47_L3	126541288	18.9812	39.5442	28.2	66.3
Salix suchowensis	YAF1	Root	47_R1	109576066	16.4364	34.2425	8.99	58.4
Salix suchowensis	YAF1	Root	47_R2	152120288	22.818	47.5376	6.93	52.6
Salix suchowensis	YAF1	Root	47_R3*	139863298	20.9795	43.7073	1.99	10.6
Salix suchowensis	YAF1	Leaf	5_L1	145200444	21.7801	45.3751	31.84	65.7
Salix suchowensis	YAF1	Leaf	5_L2	138982356	20.8474	43.432	30.33	63.5
Salix suchowensis	YAF1	Leaf	5_L3	105113582	15.767	32.848	23.34	63.3
Salix suchowensis	YAF1	Root	5_R1	125499580	18.8249	39.2186	13.11	56.9
Salix suchowensis	YAF1	Root	5_R2	123630644	18.5446	38.6346	13.59	57.8
Salix suchowensis	YAF1	Root	5_R3	109855494	16.4783	34.3298	13.33	49.1
Salix suchowensis	YAF1	Leaf	51_L1	111692574	16.7539	34.9039	23.2	52.3
Salix suchowensis	YAF1	Leaf	51_L2	105317302	15.7976	32.9117	23.62	65.5
Salix suchowensis	YAF1	Root	51_R3	107082526	16.0624	33.4633	13.77	58.5
Salix suchowensis	YAF1	Root	51_R4	161215944	24.1824	50.38	13.21	61.7
Salix suchowensis	YAF1	Leaf	55_L1	116983628	17.5475	36.5574	25.35	65.8
Salix suchowensis	YAF1	Root	55_R1	106991966	16.0488	33.435	8.25	55.8
Salix suchowensis	YAF1	Root	55_R2	106949970	16.0425	33.4219	5.74	48
* Those samples were either poorly sequenced or heavily contaminated or from an unknown source and were thus discarded in mutation identification.
