# Supplementary material for: The architecture of intra-organism mutation rate variation in plants
Source: PLoS Biol. 2019 Apr 9;17(4):e3000191. doi: 10.1371/journal.pbio.3000191 (PMC6456163; doi:10.1371/journal.pbio.3000191)
Supplement: S2 Data — (XLSX) [file pbio.3000191.s019.xlsx]

## Sheet: list
S2 Data. Full list of identified mutation sites.
Species	Individual	Chromosome	Position	Samples	Mutation Type	Predicted Effect
Arabidopsis thaliana	Col17	Chr1	9702465	Col17_SL2-3	SNV:C>T	missense_variant
Arabidopsis thaliana	Col17	Chr1	10921842	Col17_RL3-2;Col17_SL6-2	DEL:GCCATTGAGGATACTGAA	intergenic_variant
Arabidopsis thaliana	Col17	Chr1	13393397	Col17_RL3-3;Col17_RL4-2;Col17_SL4-1;Col17_SL4-2;Col17_SL8-1	SNV:C>T	non_coding_exon_variant(transposable_element_gene)
Arabidopsis thaliana	Col17	Chr1	16815984	Col17_SL1-3;Col17_SL4-1;Col17_SL4-3	SNV:G>A	intergenic_variant
Arabidopsis thaliana	Col17	Chr1	21998047	Col17_SL1-3	SNV:T>A	intergenic_variant
Arabidopsis thaliana	Col17	Chr2	1957574	Col17_SL6-1;Col17_SL6-2	SNV:C>T	intron_variant
Arabidopsis thaliana	Col17	Chr2	8992635	Col17_SL4-1	SNV:C>T	missense_variant
Arabidopsis thaliana	Col17	Chr3	8487834	Col17_SL3-1;Col17_SL3-2	SNV:T>G	intergenic_variant
Arabidopsis thaliana	Col17	Chr5	4373989	Col17_RL2-3;Col17_RL3-2;Col17_RL4-1;Col17_RL4-3;Col17_SL5-1;Col17_SL6-1;Col17_SL6-2	SNV:C>T	3_prime_UTR_variant
Arabidopsis thaliana	Col17	Chr5	12929790	Col17_SL4-3;Col17_SL1-1;Col17_SL1-2;Col17_SL1-3	SNV:C>T	non_coding_exon_variant(transposable_element_gene)
Arabidopsis thaliana	Col24	Chr1	6273570	Col24_RL3-1;Col24_RL4-1	SNV:G>A	intergenic_variant
Arabidopsis thaliana	Col24	Chr1	10316199	Col24_RL4-1;Col24_RL3-1;Col24_RL1-3;Col24_RL5-1	SNV:C>T	non_coding_exon_variant(transposable_element_gene)
Arabidopsis thaliana	Col24	Chr1	11354545	Col24_RL4-1	SNV:G>A	missense_variant
Arabidopsis thaliana	Col24	Chr1	17658851	Col24_SL6-2	SNV:G>A	non_coding_exon_variant(transposable_element_gene)
Arabidopsis thaliana	Col24	Chr1	19487621	Col24_RL5-1;Col24_SL1-2;Col24_SL1-1;Col24_SL1-3	SNV:A>T	3_prime_UTR_variant
Arabidopsis thaliana	Col24	Chr2	280858	Col24_SL5-1;Col24_SL5-2;Col24_SL5-3	SNV:T>G	synonymous_variant
Arabidopsis thaliana	Col24	Chr4	1645079	Col24_SL2-2	SNV:C>A	non_coding_exon_variant(transposable_element_gene)
Fragaria vesca	FH1	Fvb1	13418465	FH_MP-L1	SNV:C>T	intergenic_variant
Fragaria vesca	FH1	Fvb1	15706195	FH_B2-1a-L1	SNV:T>C	intergenic_variant
Fragaria vesca	FH1	Fvb1	15906371	FH_B1-1c-1b-2a-L1;FH_B1-1c-1c-L3	SNV:G>A	intron_variant
Fragaria vesca	FH1	Fvb1	16308475	FH_B1-1c-1a-L2	SNV:T>C	intergenic_variant
Fragaria vesca	FH1	Fvb2	303265	FH_B1-1a-1a-L1;FH_B1-1a-2a-L2;FH_B1-1a-2b-L1;FH_B1-1a-2c-L3;FH_B1-1a-2d-L3;FH_B1-1a-3a-L3;FH_B1-1a-3b-L3;FH_B1-1a-4a-L1;FH_B1-1a-L;FH_B1-1b-1a-L2;FH_B1-1b-1b-L2;FH_B1-1b-1c-L1;FH_B1-1b-1e-L3;FH_B1-1b-2a-L3;FH_B1-1b-2b-L3;FH_B1-1b-4b-L3;FH_B1-1b-5a-L1;FH_B1-1c-1a-L2;FH_B1-1c-1b-2a-L1;FH_B1-1c-1c-L3;FH_B1-1c-2a-L2;FH_B1-1c-L3;FH_B1-1d-L2;FH_B1-1d-S2;FH_B1-1e-2a-L1	SNV:C>G	intergenic_variant
Fragaria vesca	FH1	Fvb2	3815174	FH_B1-1e-3b-L2	SNV:C>T	intergenic_variant
Fragaria vesca	FH1	Fvb2	8285548	FH_B1-1b-1a-L2;FH_B1-1b-1b-L2;FH_B1-1b-1c-L1;FH_B1-1b-1e-L3;FH_B1-1b-4b-L3;FH_B1-1b-5a-L1	SNV:C>T	intergenic_variant
Fragaria vesca	FH1	Fvb2	17631284	FH_B2-1a-L1	SNV:C>T	intergenic_variant
Fragaria vesca	FH1	Fvb2	20294623	FH_B1-1c-S1;FH_B1-1d-S2	SNV:C>T	intergenic_variant
Fragaria vesca	FH1	Fvb2	23969538	FH_B1-1d-L2	SNV:G>A	intron_variant
Fragaria vesca	FH1	Fvb2	24622604	FH_B1-1c-1a-L2	SNV:C>T	missense_variant
Fragaria vesca	FH1	Fvb2	25708211	FH_B1-1a-4a-L1	SNV:T>A	missense_variant
Fragaria vesca	FH1	Fvb2	27400718	FH_B6-1e-L3	SNV:C>T	intergenic_variant
Fragaria vesca	FH1	Fvb3	1123637	FH_B5-1a-3b-L2	SNV:G>A	missense_variant
Fragaria vesca	FH1	Fvb3	12628892	FH_B1-2b-L1	SNV:C>T	intergenic_variant
Fragaria vesca	FH1	Fvb3	15761387	FH_B5-1a-3b-L2	SNV:G>T	intergenic_variant
Fragaria vesca	FH1	Fvb3	16287210	FH_B1-1c-L3	SNV:G>A	intron_variant
Fragaria vesca	FH1	Fvb3	20681496	FH_B1-1a-S1;FH_B1-1c-S1;FH_B1-1d-S2;FH_B1-S1	SNV:G>A	intron_variant
Fragaria vesca	FH1	Fvb3	21175815	FH_B4-1a-1e-L3	SNV:G>A	intergenic_variant
Fragaria vesca	FH1	Fvb3	28811673	FH_B1-1b-1a-L2;FH_B1-1b-1b-L2;FH_B1-1b-1c-L1;FH_B1-1b-1e-L3;FH_B1-1b-4b-L3;FH_B1-1b-5a-L1	SNV:G>A	intergenic_variant
Fragaria vesca	FH1	Fvb3	30939643	FH_MP-L1	SNV:G>A	intergenic_variant
Fragaria vesca	FH1	Fvb3	31040977	FH_B3-2b-2c-L1	SNV:C>T	intergenic_variant
Fragaria vesca	FH1	Fvb4	3561806	FH_B1-1a-S1;FH_B1-1c-S1;FH_B1-1d-S2;FH_B1-S1	SNV:C>T	intergenic_variant
Fragaria vesca	FH1	Fvb4	7366005	FH_B1-1a-S1;FH_B1-1c-S1;FH_B1-1d-S2;FH_B1-S1	DEL:TAAATCCACCCCTG	intergenic_variant
Fragaria vesca	FH1	Fvb4	7600604	FH_B1-1a-1a-L1;FH_B1-1a-1b-L2	SNV:G>A	missense_variant
Fragaria vesca	FH1	Fvb4	10008397	FH_B1-1c-1a-L2	SNV:G>A	intergenic_variant
Fragaria vesca	FH1	Fvb4	10893005	FH_B2-2d-3d-L2	SNV:G>A	intergenic_variant
Fragaria vesca	FH1	Fvb4	14660472	FH_B1-2d-2d-L3	SNV:A>G	intergenic_variant
Fragaria vesca	FH1	Fvb4	17079881	FH_B1-1a-3b-L3;FH_B1-1a-4a-L1	SNV:G>A	synonymous_variant
Fragaria vesca	FH1	Fvb4	22431494	FH_B1-1a-S1;FH_B1-1c-S1;FH_B1-1d-S2	SNV:A>G	intergenic_variant
Fragaria vesca	FH1	Fvb4	22778359	FH_B1-1b-4b-L3	DEL:T	intergenic_variant
Fragaria vesca	FH1	Fvb4	26358172	FH_B1-1a-2d-L3	SNV:C>T	intergenic_variant
Fragaria vesca	FH1	Fvb4	30696025	FH_B1-1b-1c-L1;FH_B1-1b-1e-L3	SNV:G>A	intergenic_variant
Fragaria vesca	FH1	Fvb5	1551008	FH_B1-2d-2d-L3	SNV:C>A	intron_variant
Fragaria vesca	FH1	Fvb5	6016828	FH_B1-1c-1b-2a-L1	SNV:C>A	intergenic_variant
Fragaria vesca	FH1	Fvb5	9365059	FH_B1-1b-2b-L3	SNV:C>T	intron_variant
Fragaria vesca	FH1	Fvb5	15048717	FH_B4-1c-L2	SNV:G>T	intergenic_variant
Fragaria vesca	FH1	Fvb5	16591789	FH_B3-1d-L1	SNV:C>T	synonymous_variant
Fragaria vesca	FH1	Fvb5	21840965	FH_B1-1c-2a-L2	SNV:A>T	intergenic_variant
Fragaria vesca	FH1	Fvb5	22651390	FH_B4-1a-1e-L3;FH_B4-1a-L1;FH_B4-1c-L2	SNV:T>G	intergenic_variant
Fragaria vesca	FH1	Fvb6	19530182	FH_B1-1c-1c-L3	SNV:T>G	intergenic_variant
Fragaria vesca	FH1	Fvb6	20060135	FH_B1-1a-1a-L1;FH_B1-1a-3a-L3;FH_B1-1a-3b-L3	SNV:G>A	intergenic_variant
Fragaria vesca	FH1	Fvb7	3402833	FH_B3-1a-L	SNV:G>A	intergenic_variant
Fragaria vesca	FH1	Fvb7	3973159	FH_B4-1a-1e-L3;FH_B4-1c-L2	SNV:T>A	intron_variant
Fragaria vesca	FH1	Fvb7	7324858	FH_B1-S1	SNV:G>A	intergenic_variant
Fragaria vesca	FH1	Fvb7	19999382	FH_B1-1b-1a-L2;FH_B1-1b-1b-L2;FH_B1-1b-1c-L1;FH_B1-1b-1e-L3;FH_B1-1b-4b-L3;FH_B1-1b-5a-L1	SNV:A>G	intron_variant
Oryza sativa	DG1	chr01	4851858	DG1_1-L1	SNV:C>T	intergenic_variant
Oryza sativa	DG1	chr01	5387751	DG1_4-L2;DG1_A-R28	SNV:G>A	intergenic_variant
Oryza sativa	DG1	chr01	7167636	DG1_4-L2;DG1_A-R28	DEL:TCGGCTATTATATTATATG	intergenic_variant
Oryza sativa	DG1	chr01	25743930	DG1_2-L2;DG1_6-L1;DG1_A-R13	DEL:C	intergenic_variant
Oryza sativa	DG1	chr01	36192456	DG1_6-L1;DG1_A-R6	DEL:GTACGGCTACAGTACATCTTTACCAC	intergenic_variant
Oryza sativa	DG1	chr02	27456805	DG1_6-L1	SNV:G>A	intergenic_variant
Oryza sativa	DG1	chr02	27962966	DG1_5-L2	SNV:G>T	5_prime_UTR_variant
Oryza sativa	DG1	chr02	28492223	DG1_4-R6	INS:A	intron_variant
Oryza sativa	DG1	chr02	29634595	DG1_2-R1	SNV:C>T	intergenic_variant
Oryza sativa	DG1	chr02	32093482	DG1_5-L2	SNV:C>T	5_prime_UTR_variant
Oryza sativa	DG1	chr02	33185304	DG1_5-L2;DG1_6-L1;DG1_A-R6	SNV:C>T	intergenic_variant
Oryza sativa	DG1	chr03	4529243	DG1_6-L1	DEL:TA	intergenic_variant
Oryza sativa	DG1	chr03	11214532	DG1_5-L2;DG1_A-R7	INS:AA	frameshift_variant
Oryza sativa	DG1	chr04	14127842	DG1_2-R1	SNV:C>T	intergenic_variant
Oryza sativa	DG1	chr04	20050058	DG1_1-L1;DG1_A-R14	DEL:C	intergenic_variant
Oryza sativa	DG1	chr04	24637170	DG1_2-L2;DG1_2-R1;DG1_6-L1	SNV:G>A	intergenic_variant
Oryza sativa	DG1	chr04	26395181	DG1_1-L1;DG1_A-R14	SNV:A>T	intergenic_variant
Oryza sativa	DG1	chr05	1126573	DG1_A-R33	SNV:G>A	3_prime_UTR_variant
Oryza sativa	DG1	chr05	1902313	DG1_4-R6	SNV:G>A	intergenic_variant
Oryza sativa	DG1	chr05	20125147	DG1_4-L2;DG1_A-R28	SNV:C>T	intergenic_variant
Oryza sativa	DG1	chr05	27755715	DG1_2-L2;DG1_2-R1;DG1_6-L1	SNV:C>G	intergenic_variant
Oryza sativa	DG1	chr06	4130291	DG1_4-R6;DG1_5-L2	SNV:C>T	intergenic_variant
Oryza sativa	DG1	chr06	18092563	DG1_A-R26	SNV:C>T	intergenic_variant
Oryza sativa	DG1	chr06	24563252	DG1_5-L2	SNV:C>T	intron_variant
Oryza sativa	DG1	chr06	27570028	DG1_A-R6	SNV:C>T	intergenic_variant
Oryza sativa	DG1	chr06	28028247	DG1_6-L1	SNV:G>A	intergenic_variant
Oryza sativa	DG1	chr06	29854845	DG1_4-R6;DG1_5-L2	SNV:C>G	intergenic_variant
Oryza sativa	DG1	chr07	1921999	DG1_2-L2;DG1_2-R1;DG1_6-L1	DEL:TG	intergenic_variant
Oryza sativa	DG1	chr07	11899258	DG1_2-R1	SNV:G>A	intergenic_variant
Oryza sativa	DG1	chr07	11978826	DG1_2-R1	SNV:C>T	intergenic_variant
Oryza sativa	DG1	chr07	29600267	DG1_4-R6	SNV:G>T	intergenic_variant
Oryza sativa	DG1	chr08	35331	DG1_4-L2	SNV:G>T	intergenic_variant
Oryza sativa	DG1	chr08	12567262	DG1_4-L2	SNV:G>A	intergenic_variant
Oryza sativa	DG1	chr08	18203867	DG1_2-L2	DEL:T	intergenic_variant
Oryza sativa	DG1	chr08	18368130	DG1_4-R6	SNV:C>T	intergenic_variant
Oryza sativa	DG1	chr08	20005535	DG1_A-R33	DEL:A	intergenic_variant
Oryza sativa	DG1	chr08	26292333	DG1_A-R29	SNV:C>T	intergenic_variant
Oryza sativa	DG1	chr08	26785408	DG1_A-R34	INS:ATC	intergenic_variant
Oryza sativa	DG1	chr08	27308927	DG1_1-L1	DEL:GTC	3_prime_UTR_variant
Oryza sativa	DG1	chr08	28139520	DG1_2-L2;DG1_2-R1;DG1_6-L1	DEL:AT	intergenic_variant
Oryza sativa	DG1	chr09	7021822	DG1_2-R1	SNV:A>T	intergenic_variant
Oryza sativa	DG1	chr09	16862476	DG1_4-L2	SNV:G>T	intergenic_variant
Oryza sativa	DG1	chr10	9476720	DG1_4-L2	SNV:C>T	intergenic_variant
Oryza sativa	DG1	chr11	11247757	DG1_A-R11	SNV:C>T	intergenic_variant
Oryza sativa	DG1	chr11	20942703	DG1_A-R33	SNV:G>C	intron_variant
Oryza sativa	DG1	chr11	22426054	DG1_2-R1	SNV:C>T	intergenic_variant
Oryza sativa	DG1	chr12	1483134	DG1_1-L1	SNV:G>A	intergenic_variant
Oryza sativa	DG1	chr12	25764423	DG1_1-L1;DG1_3-L2;DG1_A-R14	SNV:G>A	intergenic_variant
Oryza sativa	KA1	chr01	5180741	KT1-8	SNV:G>T	intergenic_variant
Oryza sativa	KA1	chr01	22862037	KT1-8	SNV:C>T	intergenic_variant
Oryza sativa	KA1	chr02	34359402	KT1-7	SNV:T>A	intron_variant
Oryza sativa	KA1	chr03	16047606	KT1-2	SNV:C>T	intergenic_variant
Oryza sativa	KA1	chr03	25169823	KT1-5	SNV:C>T	3_prime_UTR_variant
Oryza sativa	KA1	chr04	18734945	KT1-1	SNV:G>C	intergenic_variant
Oryza sativa	KA1	chr04	19552539	KT1-2	SNV:G>A	intergenic_variant
Oryza sativa	KA1	chr05	4206016	KT1-8	SNV:G>A	intron_variant
Oryza sativa	KA1	chr05	12304465	KT1-7	SNV:G>A	intergenic_variant
Oryza sativa	KA1	chr05	26258486	KT1-2	SNV:G>A	intergenic_variant
Oryza sativa	KA1	chr05	29928036	KT1-2	SNV:C>T	intergenic_variant
Oryza sativa	KA1	chr06	11116569	KT1-2	SNV:A>T	intergenic_variant
Oryza sativa	KA1	chr06	11235666	KT1-7	SNV:G>A	intergenic_variant
Oryza sativa	KA1	chr06	23243793	KT1-2	SNV:G>A	intergenic_variant
Oryza sativa	KA1	chr06	25500229	KT1-7	SNV:G>A	intron_variant
Oryza sativa	KA1	chr07	27646772	KT1-2	SNV:C>A	intergenic_variant
Oryza sativa	KA1	chr08	21777159	KT1-8	SNV:G>A	intergenic_variant
Oryza sativa	KA1	chr09	13559295	KT1-7	SNV:C>T	intergenic_variant
Oryza sativa	KA1	chr11	415406	KT1-2	SNV:A>G	intergenic_variant
Oryza sativa	KA1	chr11	2142993	KT1-8	SNV:C>T	intergenic_variant
Oryza sativa	KA1	chr11	7192126	KT1-8	SNV:G>C	intergenic_variant
Oryza sativa	KA1	chr11	25661557	KT1-8	SNV:C>T	intergenic_variant
Oryza sativa	KA1	chr12	9205655	KT1-2	SNV:T>C	intergenic_variant
Oryza sativa	PA1	chr01	40803279	PA1-6	SNV:G>T	intergenic_variant
Oryza sativa	PA1	chr03	29767250	PA1-5;PA1-9	SNV:G>T	intron_variant
Oryza sativa	PA1	chr04	3123038	PA1-8	SNV:C>G	intergenic_variant
Oryza sativa	PA1	chr04	3882491	PA1-5;PA1-9	SNV:C>T	intergenic_variant
Oryza sativa	PA1	chr04	8799851	PA1-5;PA1-9	SNV:G>A	intergenic_variant
Oryza sativa	PA1	chr04	10861061	PA1-6	SNV:C>T	intergenic_variant
Oryza sativa	PA1	chr06	17284189	PA1-6	SNV:G>A	intergenic_variant
Oryza sativa	PA1	chr06	27258439	PA1-3	SNV:T>A	missense_variant
Oryza sativa	PA1	chr07	7743326	PA1-5	SNV:A>C	3_prime_UTR_variant
Oryza sativa	PA1	chr07	15318719	PA1-8	SNV:C>T	intergenic_variant
Oryza sativa	PA1	chr07	18445303	PA1-5	SNV:G>A	intergenic_variant
Oryza sativa	PA1	chr10	15839685	PA1-10;PA1-8	SNV:T>A	intergenic_variant
Oryza sativa	PA1	chr12	3399527	PA1-6	RPL:ATTTG>AA	intergenic_variant
Prunus mira	G1	Pp01	379729	G1_T2-1;G1_T2-2	SNV:C>T	5_prime_UTR_variant
Prunus mira	G1	Pp01	950637	G1_B2-3	DEL:ACGACAACG	5_prime_UTR_variant
Prunus mira	G1	Pp01	3939642	G1_B1-3-1	INS:TA	intergenic_variant
Prunus mira	G1	Pp01	5372349	G1_B1-3-4-3	SNV:T>C	intergenic_variant
Prunus mira	G1	Pp01	7977474	G1_B2-5	INS:A	5_prime_UTR_variant
Prunus mira	G1	Pp01	12118876	G1_B2-4-2	SNV:A>G	intergenic_variant
Prunus mira	G1	Pp01	13771538	G1_B2-4-1	SNV:G>A	intergenic_variant
Prunus mira	G1	Pp01	15134233	G1_B1-1	SNV:A>G	intergenic_variant
Prunus mira	G1	Pp01	15444370	G1_B5	SNV:C>A	intergenic_variant
Prunus mira	G1	Pp01	16090689	G1_B1-2;G1_B1-3-1;G1_B1-3-2;G1_B1-3-3;G1_B1-3-4-1;G1_B1-3-4-2;G1_B1-3-4-3;G1_B1-3-5;G1_B1-4;G1_B1-5;G1_B1-6-1;G1_B1-6-2;G1_B1-6-3;G1_B1-7;G1_B1-8-1;G1_B1-8-2	SNV:A>T	intergenic_variant
Prunus mira	G1	Pp01	16914229	G1_B2-4-2	INS:T	intergenic_variant
Prunus mira	G1	Pp01	18717812	G1_B2-6	SNV:G>A	intergenic_variant
Prunus mira	G1	Pp01	23779048	G1_B1-8-2	SNV:G>A	missense_variant
Prunus mira	G1	Pp01	25216302	G1_B2-4-2	SNV:G>T	intergenic_variant
Prunus mira	G1	Pp01	25246234	G1_B2-4-2	SNV:A>T	intergenic_variant
Prunus mira	G1	Pp01	26826374	G1_T1;G1_T2-1;G1_T2-2;G1_T3	SNV:G>A	intergenic_variant
Prunus mira	G1	Pp01	26961383	G1_T3	SNV:G>T	intergenic_variant
Prunus mira	G1	Pp01	26987715	G1_B1-8-2	SNV:G>T	intergenic_variant
Prunus mira	G1	Pp01	28121005	G1_B2-5	SNV:T>A	5_prime_UTR_variant
Prunus mira	G1	Pp01	28827655	G1_B2-4-2	SNV:C>T	intergenic_variant
Prunus mira	G1	Pp01	30932967	G1_B1-3-3;G1_B1-3-4-1	SNV:C>T	3_prime_UTR_variant
Prunus mira	G1	Pp01	31227234	G1_B4	SNV:C>G	intergenic_variant
Prunus mira	G1	Pp01	34617202	G1_T1;G1_T2-1;G1_T2-2;G1_T3	SNV:C>T	intergenic_variant
Prunus mira	G1	Pp01	35243380	G1_B1-4	SNV:A>C	intergenic_variant
Prunus mira	G1	Pp01	36804760	G1_B4	SNV:T>A	intergenic_variant
Prunus mira	G1	Pp01	36950002	G1_B2-2;G1_B2-4-2;G1_B2-5;G1_B2-6	INS:TGGAA	frameshift_variant
Prunus mira	G1	Pp01	37077062	G1_T1;G1_T2-1;G1_T2-2;G1_T3	SNV:C>T	intergenic_variant
Prunus mira	G1	Pp01	37286210	G1_B1-3-4-2	SNV:C>A	missense_variant
Prunus mira	G1	Pp01	37949292	G1_B2-4-1	SNV:A>G	intron_variant
Prunus mira	G1	Pp01	38188489	G1_B1-8-2	SNV:C>A	intergenic_variant
Prunus mira	G1	Pp01	39040218	G1_B1-1	SNV:C>T	intergenic_variant
Prunus mira	G1	Pp01	40011492	G1_B1-3-3;G1_B1-3-4-1	SNV:C>A	intergenic_variant
Prunus mira	G1	Pp01	40213158	G1_T4-1;G1_T4-2	SNV:G>A	intergenic_variant
Prunus mira	G1	Pp01	42881112	G1_T2-1	SNV:T>C	intron_variant
Prunus mira	G1	Pp01	45833947	G1_B2-2;G1_B2-4-1	SNV:C>T	intergenic_variant
Prunus mira	G1	Pp01	45895632	G1_T3	SNV:A>T	intron_variant
Prunus mira	G1	Pp01	46166373	G1_B1-3-2	SNV:G>A	intergenic_variant
Prunus mira	G1	Pp01	46999666	G1_B1-3-5;G1_B1-5	SNV:G>C	intron_variant
Prunus mira	G1	Pp01	47163698	G1_B1-3-4-3	INS:A	intergenic_variant
Prunus mira	G1	Pp01	47408612	G1_T2-1;G1_T2-2	SNV:T>A	5_prime_UTR_variant
Prunus mira	G1	Pp01	47788904	G1_B1-1	SNV:G>A	intergenic_variant
Prunus mira	G1	Pp02	715453	G1_B1-3-5	SNV:T>C	missense_variant
Prunus mira	G1	Pp02	2713384	G1_T2-1;G1_T2-2;G1_T3	SNV:G>A	intergenic_variant
Prunus mira	G1	Pp02	2730190	G1_B1-3-4-3	SNV:G>T	intergenic_variant
Prunus mira	G1	Pp02	4203333	G1_B1-2	SNV:T>C	intergenic_variant
Prunus mira	G1	Pp02	4556725	G1_B5	SNV:C>T	intergenic_variant
Prunus mira	G1	Pp02	5114247	G1_B1-4;G1_B1-5	SNV:C>T	intergenic_variant
Prunus mira	G1	Pp02	6468994	G1_B2-4-2	SNV:C>A	intron_variant
Prunus mira	G1	Pp02	7007905	G1_B1-3-4-2	SNV:C>T	intergenic_variant
Prunus mira	G1	Pp02	8674785	G1_T1;G1_T2-1;G1_T2-2;G1_T3	SNV:G>T	intergenic_variant
Prunus mira	G1	Pp02	10409554	G1_B1-5	SNV:A>T	intergenic_variant
Prunus mira	G1	Pp02	10467405	G1_B2-2	SNV:T>C	intergenic_variant
Prunus mira	G1	Pp02	10705078	G1_B1-3-4-2	SNV:C>T	intergenic_variant
Prunus mira	G1	Pp02	10708985	G1_T2-1;G1_T2-2;G1_T3	SNV:T>A	intergenic_variant
Prunus mira	G1	Pp02	11225819	G1_B1-4;G1_B1-5	SNV:C>T	intergenic_variant
Prunus mira	G1	Pp02	12929877	G1_B1-3-4-1	SNV:C>G	intergenic_variant
Prunus mira	G1	Pp02	14259881	G1_B1-3-3;G1_B1-3-4-1;G1_B1-3-5	SNV:C>T	intergenic_variant
Prunus mira	G1	Pp02	15758795	G1_B1-3-3;G1_B1-3-4-1	SNV:C>A	intergenic_variant
Prunus mira	G1	Pp02	19826638	G1_T2-1;G1_T2-2;G1_T3	SNV:G>A	intergenic_variant
Prunus mira	G1	Pp02	19972424	G1_B1-2;G1_B1-3-1;G1_B1-3-2;G1_B1-3-3;G1_B1-3-4-1;G1_B1-3-4-2;G1_B1-3-4-3;G1_B1-3-5;G1_B1-4;G1_B1-5;G1_B1-6-1;G1_B1-6-2;G1_B1-6-3;G1_B1-7;G1_B1-8-1;G1_B1-8-2;G1_T4-1;G1_T4-2	DEL:AAGGATTTTGA	intergenic_variant
Prunus mira	G1	Pp02	22243864	G1_B1-4;G1_B1-5	DEL:TCTCTCTCTCTC	intergenic_variant
Prunus mira	G1	Pp02	23756762	G1_T1	SNV:G>A	intron_variant
Prunus mira	G1	Pp02	24641774	G1_B1-2;G1_B1-3-1;G1_B1-3-2;G1_B1-3-3;G1_B1-3-4-1;G1_B1-3-4-2;G1_B1-3-4-3;G1_B1-3-5;G1_B1-4;G1_B1-5;G1_B1-6-1;G1_B1-6-2;G1_B1-6-3;G1_B1-7;G1_B1-8-1;G1_B1-8-2	SNV:G>T	synonymous_variant
Prunus mira	G1	Pp02	25438901	G1_T2-2	SNV:G>A	intron_variant
Prunus mira	G1	Pp03	461729	G1_B1-3-5	INS:GA	intergenic_variant
Prunus mira	G1	Pp03	901986	G1_B2-4-2	SNV:G>T	intergenic_variant
Prunus mira	G1	Pp03	3491851	G1_B1-2;G1_B1-3-1;G1_B1-3-2;G1_B1-3-3;G1_B1-3-4-1;G1_B1-3-4-2;G1_B1-3-4-3;G1_B1-3-5;G1_B1-5;G1_B1-6-1;G1_B1-6-2;G1_B1-6-3;G1_B1-7;G1_B1-8-1;G1_B1-8-2	INS:GA	intron_variant
Prunus mira	G1	Pp03	4749540	G1_B1-3-4-3	SNV:T>G	intergenic_variant
Prunus mira	G1	Pp03	5545241	G1_B1-8-1;G1_B1-8-2	SNV:C>T	intergenic_variant
Prunus mira	G1	Pp03	6481549	G1_B1-3-4-3	SNV:C>T	intergenic_variant
Prunus mira	G1	Pp03	7383267	G1_T2-1;G1_T2-2;G1_T3	SNV:C>T	intergenic_variant
Prunus mira	G1	Pp03	7580708	G1_B1-3-5	SNV:T>C	intron_variant
Prunus mira	G1	Pp03	8675283	G1_T2-1	SNV:G>A	intergenic_variant
Prunus mira	G1	Pp03	14156213	G1_B1-3-5	SNV:C>T	intergenic_variant
Prunus mira	G1	Pp03	15159191	G1_T1;G1_T2-1;G1_T2-2;G1_T3	SNV:C>T	intergenic_variant
Prunus mira	G1	Pp03	15424302	G1_B1-3-4-3	SNV:C>A	intergenic_variant
Prunus mira	G1	Pp03	15436004	G1_B1-3-5	SNV:C>T	intergenic_variant
Prunus mira	G1	Pp03	21278228	G1_B1-3-4-1	SNV:C>T	intergenic_variant
Prunus mira	G1	Pp03	22708333	G1_B1-3-4-3	INS:AT	intergenic_variant
Prunus mira	G1	Pp03	23245882	G1_B1-2	SNV:T>A	intron_variant
Prunus mira	G1	Pp03	24329694	G1_B1-1	SNV:G>T	intergenic_variant
Prunus mira	G1	Pp03	25884998	G1_B1-8-1	INS:CT	intron_variant
Prunus mira	G1	Pp03	26679435	G1_B1-8-2	INS:ACATC	frameshift_variant
Prunus mira	G1	Pp03	26679435	G1_B2-3;G1_T1	INS:ACATGTC	frameshift_variant
Prunus mira	G1	Pp03	26679441	G1_B2-5	INS:G	frameshift_variant
Prunus mira	G1	Pp03	26679442	G1_B1-7	RPL:CTGTTAA>G	stop_gained
Prunus mira	G1	Pp03	27068594	G1_B1-7	SNV:A>T	synonymous_variant
Prunus mira	G1	Pp03	27238424	G1_B5	SNV:A>T	intergenic_variant
Prunus mira	G1	Pp04	743244	G1_B2-1	SNV:T>A	intergenic_variant
Prunus mira	G1	Pp04	1716012	G1_B1-3-3	INS:ACTTGGCACATCAACTATTAAGCAAGATTTTAAGGAAGAT	intron_variant
Prunus mira	G1	Pp04	2776200	G1_B1-4	SNV:C>T	intergenic_variant
Prunus mira	G1	Pp04	3757616	G1_T3	DEL:C	frameshift_variant
Prunus mira	G1	Pp04	4240470	G1_B1-1	SNV:A>G	intergenic_variant
Prunus mira	G1	Pp04	5821350	G1_B2-5	SNV:C>T	intergenic_variant
Prunus mira	G1	Pp04	6117742	G1_B2-2;G1_B2-4-1	SNV:T>C	intergenic_variant
Prunus mira	G1	Pp04	7808004	G1_B2-5	INS:GGAGCGCGAGTCGGTGCCTGAGAA	inframe_insertion
Prunus mira	G1	Pp04	8521791	G1_B4	SNV:T>C	intron_variant
Prunus mira	G1	Pp04	8618639	G1_T4-1;G1_T4-2	SNV:C>A	missense_variant
Prunus mira	G1	Pp04	8791094	G1_B1-2;G1_B1-3-4-2;G1_B1-5;G1_B1-6-1;G1_B1-6-2;G1_B1-6-3	SNV:C>T	intergenic_variant
Prunus mira	G1	Pp04	9287516	G1_T2-1;G1_T2-2;G1_T3	SNV:G>A	synonymous_variant
Prunus mira	G1	Pp04	9717730	G1_B4	SNV:A>G	intergenic_variant
Prunus mira	G1	Pp04	10863645	G1_B5	SNV:C>T	intergenic_variant
Prunus mira	G1	Pp04	12339994	G1_B1-3-4-2	SNV:C>A	intergenic_variant
Prunus mira	G1	Pp04	12948756	G1_B1-3-4-2;G1_B1-3-4-3	SNV:C>A	intron_variant
Prunus mira	G1	Pp04	13036335	G1_B1-8-1	SNV:T>A	5_prime_UTR_variant
Prunus mira	G1	Pp04	13563383	G1_B2-3	SNV:A>G	intergenic_variant
Prunus mira	G1	Pp04	13795871	G1_B1-5	SNV:A>C	missense_variant
Prunus mira	G1	Pp04	14239930	G1_B1-5	SNV:C>T	intergenic_variant
Prunus mira	G1	Pp04	15027062	G1_B2-2;G1_B2-4-1	MNV:GCA>CGC	intergenic_variant
Prunus mira	G1	Pp04	22534663	G1_B1-3-4-2	SNV:T>C	intergenic_variant
Prunus mira	G1	Pp04	23433407	G1_B1-3-4-2;G1_B1-3-4-3	SNV:T>C	intergenic_variant
Prunus mira	G1	Pp04	24417388	G1_B1-6-1;G1_B1-6-2;G1_B1-6-3;G1_B1-7	SNV:G>T	intergenic_variant
Prunus mira	G1	Pp05	2257598	G1_B2-4-1	SNV:G>T	intergenic_variant
Prunus mira	G1	Pp05	2436653	G1_B1-2;G1_B1-3-1;G1_B1-3-2;G1_B1-3-3;G1_B1-3-4-1;G1_B1-3-4-2;G1_B1-3-4-3;G1_B1-3-5;G1_B1-4;G1_B1-5;G1_B1-6-1;G1_B1-6-2;G1_B1-6-3;G1_B1-7;G1_B1-8-1;G1_B1-8-2	INS:ACACACACACACACACACACAC	intergenic_variant
Prunus mira	G1	Pp05	2468566	G1_B1-5	SNV:C>T	intergenic_variant
Prunus mira	G1	Pp05	3166094	G1_B1-3-4-1	SNV:T>A	intergenic_variant
Prunus mira	G1	Pp05	4139340	G1_B5	INS:T	intergenic_variant
Prunus mira	G1	Pp05	5572966	G1_B2-4-1	DEL:G	intron_variant
Prunus mira	G1	Pp05	5887115	G1_T2-1	SNV:T>C	intergenic_variant
Prunus mira	G1	Pp05	5903785	G1_T1;G1_T2-1	SNV:C>T	intergenic_variant
Prunus mira	G1	Pp05	6811886	G1_B2-3	SNV:G>T	missense_variant
Prunus mira	G1	Pp05	7755403	G1_B2-4-2	SNV:A>T	intergenic_variant
Prunus mira	G1	Pp05	9257135	G1_B1-1	SNV:C>T	intergenic_variant
Prunus mira	G1	Pp05	10959484	G1_B2-3	SNV:C>T	intergenic_variant
Prunus mira	G1	Pp05	12594202	G1_B1-7	DEL:GGCCCATCT	intergenic_variant
Prunus mira	G1	Pp05	13026334	G1_B5	SNV:G>A	intergenic_variant
Prunus mira	G1	Pp05	14076612	G1_T4-1;G1_T4-2	SNV:A>G	intron_variant
Prunus mira	G1	Pp05	14141535	G1_B1-3-3	SNV:T>C	missense_variant
Prunus mira	G1	Pp05	14332003	G1_B1-3-2	SNV:G>A	intergenic_variant
Prunus mira	G1	Pp05	15164079	G1_T4-1;G1_T4-2	SNV:G>A	missense_variant
Prunus mira	G1	Pp05	15361842	G1_B1-3-2;G1_B1-3-4-1;G1_B1-3-4-2;G1_B1-3-4-3;G1_B1-5;G1_B1-6-2;G1_B1-8-1	SNV:A>T	intergenic_variant
Prunus mira	G1	Pp05	15532578	G1_B1-2;G1_B1-4;G1_B1-5;G1_B1-8-1;G1_B1-8-2	SNV:G>T	missense_variant
Prunus mira	G1	Pp05	16438264	G1_B4	SNV:A>G	intergenic_variant
Prunus mira	G1	Pp05	17026677	G1_T3	INS:GGGTA	frameshift_variant
Prunus mira	G1	Pp06	316836	G1_B1-8-1	SNV:G>A	synonymous_variant
Prunus mira	G1	Pp06	4036668	G1_B2-5	SNV:A>T	3_prime_UTR_variant
Prunus mira	G1	Pp06	4237434	G1_B1-6-1;G1_B1-6-2;G1_B1-6-3	SNV:T>A	intergenic_variant
Prunus mira	G1	Pp06	4498595	G1_T4-2	SNV:T>C	missense_variant
Prunus mira	G1	Pp06	7044362	G1_T4-1;G1_T4-2	SNV:G>T	intergenic_variant
Prunus mira	G1	Pp06	9157035	G1_B4	SNV:G>A	intergenic_variant
Prunus mira	G1	Pp06	9256074	G1_B1-2	INS:T	intron_variant
Prunus mira	G1	Pp06	10431671	G1_B1-4	SNV:C>G	intergenic_variant
Prunus mira	G1	Pp06	11299771	G1_B2-5	INS:G	intergenic_variant
Prunus mira	G1	Pp06	12459769	G1_B2-3	RPL:GCA>GTCT	intron_variant
Prunus mira	G1	Pp06	13703808	G1_B2-6	SNV:A>G	intergenic_variant
Prunus mira	G1	Pp06	16595960	G1_B1-3-4-3	SNV:G>A	intergenic_variant
Prunus mira	G1	Pp06	16785783	G1_B1-2;G1_B1-3-1;G1_B1-3-2;G1_B1-3-4-1;G1_B1-3-4-2;G1_B1-3-4-3;G1_B1-3-5;G1_B1-4;G1_B1-5;G1_B1-6-1;G1_B1-6-3;G1_B1-7;G1_B1-8-1	SNV:C>A	intergenic_variant
Prunus mira	G1	Pp06	17120951	G1_B2-4-2	SNV:G>A	intergenic_variant
Prunus mira	G1	Pp06	17227134	G1_B2-6	SNV:C>A	intergenic_variant
Prunus mira	G1	Pp06	17924363	G1_B1-3-1;G1_B1-3-2;G1_B1-3-3;G1_B1-3-4-1;G1_B1-3-4-2;G1_B1-3-4-3;G1_B1-3-5	SNV:G>A	intergenic_variant
Prunus mira	G1	Pp06	20164564	G1_T1;G1_T2-1;G1_T2-2;G1_T3	SNV:C>T	intergenic_variant
Prunus mira	G1	Pp06	20549765	G1_T4-1;G1_T4-2	SNV:C>A	intron_variant
Prunus mira	G1	Pp06	20953945	G1_B2-6	SNV:G>A	intergenic_variant
Prunus mira	G1	Pp06	22417779	G1_B1-1	SNV:G>T	intergenic_variant
Prunus mira	G1	Pp06	22572349	G1_T4-1	SNV:G>A	synonymous_variant
Prunus mira	G1	Pp06	22958438	G1_B1-6-2;G1_B1-6-3	SNV:C>T	intron_variant
Prunus mira	G1	Pp06	23349659	G1_B1-5	INS:T	5_prime_UTR_variant
Prunus mira	G1	Pp06	23924884	G1_B4	SNV:A>C	missense_variant
Prunus mira	G1	Pp06	24087878	G1_B1-4	SNV:G>C	intergenic_variant
Prunus mira	G1	Pp06	24706453	G1_B1-5	INS:CA	intergenic_variant
Prunus mira	G1	Pp06	25466316	G1_B1-3-4-2;G1_B1-3-4-3	SNV:C>G	intergenic_variant
Prunus mira	G1	Pp06	25560701	G1_B2-2;G1_B2-4-1	INS:GTGTGAAG	5_prime_UTR_variant
Prunus mira	G1	Pp06	26009192	G1_B2-2;G1_B2-4-1	SNV:A>T	missense_variant
Prunus mira	G1	Pp06	26687287	G1_B4	SNV:C>T	intron_variant
Prunus mira	G1	Pp06	27675171	G1_T2-1;G1_T2-2;G1_T3	SNV:T>G	intron_variant
Prunus mira	G1	Pp06	28348183	G1_T1;G1_T2-1;G1_T2-2;G1_T3	SNV:A>G	intron_variant
Prunus mira	G1	Pp06	29374932	G1_T4-1;G1_T4-2	SNV:T>A	missense_variant
Prunus mira	G1	Pp06	30436074	G1_B1-8-1;G1_B1-8-2	SNV:T>A	intergenic_variant
Prunus mira	G1	Pp07	3036419	G1_B2-1	DEL:AA	intron_variant
Prunus mira	G1	Pp07	3785219	G1_T2-2	SNV:G>A	intergenic_variant
Prunus mira	G1	Pp07	6809705	G1_B1-3-3;G1_B1-3-4-1	SNV:C>A	intergenic_variant
Prunus mira	G1	Pp07	7100947	G1_B1-8-1	SNV:C>T	intergenic_variant
Prunus mira	G1	Pp07	7158463	G1_T2-1;G1_T2-2;G1_T3	SNV:A>T	intron_variant
Prunus mira	G1	Pp07	7323111	G1_B2-6	SNV:G>A	intergenic_variant
Prunus mira	G1	Pp07	8549343	G1_B2-6	INS:CC	intergenic_variant
Prunus mira	G1	Pp07	9103672	G1_B1-3-2	SNV:C>T	intergenic_variant
Prunus mira	G1	Pp07	10446029	G1_B1-3-4-2	SNV:C>T	intergenic_variant
Prunus mira	G1	Pp07	10822363	G1_B1-4	INS:T	intergenic_variant
Prunus mira	G1	Pp07	11380405	G1_B2-1	SNV:A>G	intron_variant
Prunus mira	G1	Pp07	12170130	G1_T3	SNV:G>A	missense_variant
Prunus mira	G1	Pp07	12606494	G1_B1-2;G1_B1-3-2;G1_B1-3-3;G1_B1-3-4-1;G1_B1-3-4-2;G1_B1-3-4-3;G1_B1-4;G1_B1-5;G1_B1-6-1;G1_B1-6-2;G1_B1-6-3;G1_B1-7;G1_B1-8-2	DEL:TG	intergenic_variant
Prunus mira	G1	Pp07	14787107	G1_B1-5	SNV:T>C	intergenic_variant
Prunus mira	G1	Pp07	16072005	G1_B5	SNV:G>A	intron_variant
Prunus mira	G1	Pp07	17273057	G1_B1-3-4-2	SNV:T>C	3_prime_UTR_variant
Prunus mira	G1	Pp07	19057866	G1_T2-1	SNV:T>C	intergenic_variant
Prunus mira	G1	Pp07	19961661	G1_B4	SNV:A>G	intron_variant
Prunus mira	G1	Pp07	20198893	G1_B2-1	SNV:T>C	missense_variant
Prunus mira	G1	Pp07	20927927	G1_B2-4-2	SNV:G>A	missense_variant
Prunus mira	G1	Pp07	21706149	G1_T3	SNV:A>G	intergenic_variant
Prunus mira	G1	Pp07	21751472	G1_B2-5	SNV:C>T	intron_variant
Prunus mira	G1	Pp08	55341	G1_B1-3-4-2	SNV:A>G	synonymous_variant
Prunus mira	G1	Pp08	3255721	G1_B2-3	INS:GTTTTAC	intron_variant
Prunus mira	G1	Pp08	4368810	G1_B1-1	SNV:G>T	3_prime_UTR_variant
Prunus mira	G1	Pp08	4523196	G1_B1-3-5	DEL:T	intron_variant
Prunus mira	G1	Pp08	7061880	G1_B4	SNV:C>G	intergenic_variant
Prunus mira	G1	Pp08	7636659	G1_T1	SNV:C>T	intergenic_variant
Prunus mira	G1	Pp08	9066225	G1_B2-5	SNV:G>C	intergenic_variant
Prunus mira	G1	Pp08	11131473	G1_T2-1;G1_T2-2;G1_T3	DEL:TTTTTTTTTTCCTT	intron_variant
Prunus mira	G1	Pp08	11724102	G1_B2-3	SNV:A>T	intergenic_variant
Prunus mira	G1	Pp08	11765548	G1_B2-4-1	SNV:C>T	missense_variant
Prunus mira	G1	Pp08	11915903	G1_B1-3-2	SNV:G>A	intergenic_variant
Prunus mira	G1	Pp08	19905225	G1_T2-2	DEL:G	5_prime_UTR_variant
Prunus mira	G1	Pp08	20626414	G1_T2-1;G1_T2-2;G1_T3	SNV:A>G	intergenic_variant
Prunus mira	G1	Pp08	21323269	G1_B2-5	MNV:GG>TT	missense_variant
Prunus mira	G1	Pp08	21547203	G1_B2-2;G1_B2-4-1	DEL:CAATGAGTCTAAATCCCCGAGT	intergenic_variant
Prunus mira	G2	Pp01	1354830	G2_B2-1-1;G2_B2-1-2;G2_B2-1-3;G2_B2-2;G2_B2-3-1;G2_B2-3-2;G2_B2-4;G2_B2-5	SNV:G>A	intergenic_variant
Prunus mira	G2	Pp01	1700779	G2_B2-5	SNV:T>C	missense_variant
Prunus mira	G2	Pp01	15838168	G2_B2-3-2	SNV:C>A	intergenic_variant
Prunus mira	G2	Pp01	19311857	G2_B1-1-1;G2_B1-1-2;G2_B1-2-1;G2_B1-2-2	SNV:G>A	intron_variant
Prunus mira	G2	Pp01	20249463	G2_B1-1-1;G2_B1-1-2	DEL:ACATGTG	intergenic_variant
Prunus mira	G2	Pp01	20751148	G2_B2-1-1;G2_B2-1-2;G2_B2-1-3	SNV:C>T	intergenic_variant
Prunus mira	G2	Pp01	23408429	G2_B2-1-1;G2_B2-1-2;G2_B2-1-3	SNV:C>T	intergenic_variant
Prunus mira	G2	Pp01	28369421	G2_B2-5	SNV:C>A	missense_variant
Prunus mira	G2	Pp01	28819364	G2_B2-1-2;G2_B2-1-3;G2_B2-2;G2_B2-3-1;G2_B2-3-2;G2_B2-4	INS:A	intergenic_variant
Prunus mira	G2	Pp01	29341792	G2_B1-2-1	INS:GAGA	intergenic_variant
Prunus mira	G2	Pp01	29750559	G2_B1-1-1;G2_B1-1-2;G2_B1-2-1;G2_B1-2-2	SNV:C>T	intergenic_variant
Prunus mira	G2	Pp01	31454220	G2_B2-1-1;G2_B2-1-2;G2_B2-1-3	INS:CT	intergenic_variant
Prunus mira	G2	Pp01	33453008	G2_B2-1-3	SNV:A>G	intergenic_variant
Prunus mira	G2	Pp01	34107106	G2_B2-1-2	SNV:G>A	intergenic_variant
Prunus mira	G2	Pp01	34285027	G2_B2-3-1	SNV:T>A	5_prime_UTR_variant
Prunus mira	G2	Pp01	34503474	G2_B2-1-1;G2_B2-1-2;G2_B2-3-1;G2_B2-3-2;G2_B2-5	SNV:A>C	5_prime_UTR_variant
Prunus mira	G2	Pp01	38579367	G2_B1-1-1;G2_B1-1-2	SNV:A>G	intergenic_variant
Prunus mira	G2	Pp01	39125122	G2_B2-3-1	SNV:C>A	intergenic_variant
Prunus mira	G2	Pp01	39514155	G2_B1-2-2	SNV:A>G	5_prime_UTR_variant
Prunus mira	G2	Pp01	40114428	G2_B2-1-3	DEL:TCTCTCTCTCTC	intron_variant
Prunus mira	G2	Pp01	42135938	G2_B1-1-1;G2_B1-2-1;G2_B1-2-2	INS:CT	intergenic_variant
Prunus mira	G2	Pp01	45086901	G2_B2-3-2	INS:CTCTCT	intergenic_variant
Prunus mira	G2	Pp01	46720159	G2_B2-3-2	MNV:GC>AA	intron_variant
Prunus mira	G2	Pp02	242070	G2_B2-1-1	INS:GA	intron_variant
Prunus mira	G2	Pp02	710649	G2_B2-4	SNV:G>A	missense_variant
Prunus mira	G2	Pp02	889816	G2_B1-1-1	RPL:ACA>TC	intergenic_variant
Prunus mira	G2	Pp02	2724313	G2_B1-1-1;G2_B1-1-2	DEL:A	intron_variant
Prunus mira	G2	Pp02	3461705	G2_B2-3-1;G2_B2-3-2	INS:TC	intron_variant
Prunus mira	G2	Pp02	4624319	G2_B1-1-1;G2_B1-1-2	SNV:A>G	intergenic_variant
Prunus mira	G2	Pp02	6154519	G2_B1-1-1;G2_B1-1-2	SNV:G>A	intergenic_variant
Prunus mira	G2	Pp02	7619173	G2_B2-1-3	SNV:T>A	intergenic_variant
Prunus mira	G2	Pp02	9198479	G2_B1-1-1;G2_B1-1-2	SNV:T>G	intergenic_variant
Prunus mira	G2	Pp02	9955599	G2_B2-5	SNV:A>C	intergenic_variant
Prunus mira	G2	Pp02	10108135	G2_B2-2	SNV:C>T	intergenic_variant
Prunus mira	G2	Pp02	10653568	G2_B2-3-2	SNV:G>T	intergenic_variant
Prunus mira	G2	Pp02	10714645	G2_B2-1-1;G2_B2-1-2;G2_B2-1-3;G2_B2-2;G2_B2-3-1;G2_B2-3-2;G2_B2-4;G2_B2-5	SNV:G>A	intergenic_variant
Prunus mira	G2	Pp02	10822027	G2_B2-1-1;G2_B2-1-3	SNV:C>T	intergenic_variant
Prunus mira	G2	Pp02	12195282	G2_B2-2	INS:A	intergenic_variant
Prunus mira	G2	Pp02	12553995	G2_B1-2-1;G2_B1-2-2	SNV:G>C	intergenic_variant
Prunus mira	G2	Pp02	13307184	G2_B1-1-1;G2_B1-1-2	SNV:A>T	intergenic_variant
Prunus mira	G2	Pp02	13523019	G2_B2-5	SNV:C>T	intergenic_variant
Prunus mira	G2	Pp02	14018032	G2_B2-1-3	SNV:C>T	intergenic_variant
Prunus mira	G2	Pp02	15479688	G2_B2-4	SNV:A>T	3_prime_UTR_variant
Prunus mira	G2	Pp02	16523988	G2_B2-1-1;G2_B2-1-2;G2_B2-1-3;G2_B2-2;G2_B2-3-1;G2_B2-3-2;G2_B2-4;G2_B2-5	SNV:G>A	intergenic_variant
Prunus mira	G2	Pp02	18187332	G2_B2-3-1	SNV:G>A	intergenic_variant
Prunus mira	G2	Pp02	18251352	G2_B1-1-1;G2_B1-1-2;G2_B1-2-1;G2_B1-2-2	INS:CT	intergenic_variant
Prunus mira	G2	Pp02	19143300	G2_B2-3-1	DEL:AA	intron_variant
Prunus mira	G2	Pp02	20347284	G2_B2-1-3	SNV:T>G	5_prime_UTR_variant
Prunus mira	G2	Pp02	25047765	G2_B2-1-3	SNV:T>C	intergenic_variant
Prunus mira	G2	Pp02	28603124	G2_B2-5	SNV:T>C	intergenic_variant
Prunus mira	G2	Pp02	28954383	G2_B1-1-2	SNV:C>T	synonymous_variant
Prunus mira	G2	Pp02	29550162	G2_B2-3-1	DEL:CTTCTTCTTCTT	5_prime_UTR_variant
Prunus mira	G2	Pp03	205854	G2_B2-4	SNV:C>T	3_prime_UTR_variant
Prunus mira	G2	Pp03	990351	G2_B1-1-1	SNV:T>G	intergenic_variant
Prunus mira	G2	Pp03	1972123	G2_B2-4	SNV:C>T	intergenic_variant
Prunus mira	G2	Pp03	4449821	G2_B1-2-1;G2_B1-2-2	SNV:A>T	intergenic_variant
Prunus mira	G2	Pp03	4820775	G2_B2-1-3	INS:GA	intergenic_variant
Prunus mira	G2	Pp03	5632632	G2_B1-1-1;G2_B1-1-2	SNV:T>C	intergenic_variant
Prunus mira	G2	Pp03	6834213	G2_B2-1-3	SNV:A>G	intergenic_variant
Prunus mira	G2	Pp03	9940052	G2_B2-5	DEL:TTTTTTA	intron_variant
Prunus mira	G2	Pp03	10176792	G2_B2-5	SNV:C>T	intergenic_variant
Prunus mira	G2	Pp03	16671781	G2_B2-1-1;G2_B2-1-2;G2_B2-1-3;G2_B2-2;G2_B2-3-1;G2_B2-3-2;G2_B2-4;G2_B2-5	SNV:G>A	intergenic_variant
Prunus mira	G2	Pp03	19115426	G2_B2-1-1;G2_B2-1-2;G2_B2-1-3;G2_B2-2;G2_B2-3-1;G2_B2-3-2;G2_B2-4;G2_B2-5	SNV:C>T	missense_variant
Prunus mira	G2	Pp03	20499978	G2_B1-1-2	SNV:T>C	intron_variant
Prunus mira	G2	Pp03	21282184	G2_B1-1-2	DEL:T	5_prime_UTR_variant
Prunus mira	G2	Pp03	24024000	G2_B2-3-1	SNV:C>T	intergenic_variant
Prunus mira	G2	Pp04	1424348	G2_B2-5	DEL:CTCTCTCTCT	5_prime_UTR_variant
Prunus mira	G2	Pp04	2827976	G2_B2-2	SNV:T>G	intron_variant
Prunus mira	G2	Pp04	5307702	G2_B1-1-1;G2_B1-1-2	SNV:G>A	intergenic_variant
Prunus mira	G2	Pp04	5546740	G2_B2-1-1	SNV:C>G	intergenic_variant
Prunus mira	G2	Pp04	6697444	G2_B2-1-1;G2_B2-1-2;G2_B2-1-3;G2_B2-2;G2_B2-3-1;G2_B2-3-2;G2_B2-5	DEL:AGAGAGAGAGAGAG	intergenic_variant
Prunus mira	G2	Pp04	6770718	G2_B2-1-1;G2_B2-1-2;G2_B2-1-3	DEL:G	intron_variant
Prunus mira	G2	Pp04	8361899	G2_B2-2	DEL:TA	intergenic_variant
Prunus mira	G2	Pp04	8737405	G2_B1-2-2	INS:AT	intergenic_variant
Prunus mira	G2	Pp04	12706750	G2_B2-3-2	SNV:G>T	intron_variant
Prunus mira	G2	Pp04	13983818	G2_B2-1-3	DEL:CTCTCTCTCTCTCT	intergenic_variant
Prunus mira	G2	Pp04	17940186	G2_B2-2	SNV:G>A	intron_variant
Prunus mira	G2	Pp04	19370032	G2_B1-1-1;G2_B1-1-2	SNV:G>A	intergenic_variant
Prunus mira	G2	Pp04	19933416	G2_B1-1-1	SNV:C>G	intergenic_variant
Prunus mira	G2	Pp04	21689980	G2_B2-3-2	SNV:C>T	intergenic_variant
Prunus mira	G2	Pp04	21896781	G2_B2-3-2	INS:AT	intergenic_variant
Prunus mira	G2	Pp04	23361897	G2_B2-5	DEL:TCTTGATTTT	intergenic_variant
Prunus mira	G2	Pp04	25105072	G2_B1-2-1;G2_B1-2-2	SNV:G>T	intergenic_variant
Prunus mira	G2	Pp05	419657	G2_B2-5	SNV:T>A	intergenic_variant
Prunus mira	G2	Pp05	2072732	G2_B2-3-2	SNV:C>T	intron_variant
Prunus mira	G2	Pp05	3269806	G2_B1-1-1;G2_B1-1-2	SNV:C>T	intergenic_variant
Prunus mira	G2	Pp05	3410223	G2_B1-1-1;G2_B1-1-2;G2_B1-2-2	SNV:C>T	intergenic_variant
Prunus mira	G2	Pp05	4260499	G2_B2-3-1	SNV:A>T	3_prime_UTR_variant
Prunus mira	G2	Pp05	5171635	G2_B2-1-3	SNV:C>A	intergenic_variant
Prunus mira	G2	Pp05	6292036	G2_B1-2-2	SNV:A>G	missense_variant
Prunus mira	G2	Pp05	6898979	G2_B1-1-1;G2_B1-1-2	SNV:G>A	intergenic_variant
Prunus mira	G2	Pp05	10144095	G2_B1-1-1;G2_B1-1-2	SNV:G>A	intergenic_variant
Prunus mira	G2	Pp05	12590857	G2_B2-1-1;G2_B2-1-3	SNV:C>T	intergenic_variant
Prunus mira	G2	Pp05	14425391	G2_B2-3-1;G2_B2-3-2	DEL:T	intron_variant
Prunus mira	G2	Pp05	17189263	G2_B2-3-2	SNV:T>A	intergenic_variant
Prunus mira	G2	Pp05	17854294	G2_B2-1-1;G2_B2-1-3	SNV:A>T	intron_variant
Prunus mira	G2	Pp05	17876949	G2_B1-2-1;G2_B1-2-2	INS:TA	intergenic_variant
Prunus mira	G2	Pp06	304129	G2_B2-3-2	SNV:T>C	synonymous_variant
Prunus mira	G2	Pp06	4643347	G2_B2-1-1	SNV:T>C	missense_variant
Prunus mira	G2	Pp06	4964896	G2_B1-2-2	DEL:TCTCTCTCTA	5_prime_UTR_variant
Prunus mira	G2	Pp06	5997915	G2_B2-2	SNV:C>G	intergenic_variant
Prunus mira	G2	Pp06	6575983	G2_B1-2-1	SNV:C>T	intergenic_variant
Prunus mira	G2	Pp06	7045613	G2_B2-5	SNV:A>G	intergenic_variant
Prunus mira	G2	Pp06	10677766	G2_B1-2-2	SNV:G>A	intergenic_variant
Prunus mira	G2	Pp06	15633535	G2_B1-2-1;G2_B1-2-2	SNV:T>A	intergenic_variant
Prunus mira	G2	Pp06	16742741	G2_B2-2	SNV:C>T	intergenic_variant
Prunus mira	G2	Pp06	16816411	G2_B2-1-1;G2_B2-1-2;G2_B2-1-3;G2_B2-2;G2_B2-3-1;G2_B2-3-2;G2_B2-4;G2_B2-5	SNV:C>T	intergenic_variant
Prunus mira	G2	Pp06	19789196	G2_B1-2-2	SNV:C>T	intron_variant
Prunus mira	G2	Pp06	23235024	G2_B2-5	DEL:CTCTC	5_prime_UTR_variant
Prunus mira	G2	Pp06	24732245	G2_B1-2-1;G2_B1-2-2	SNV:T>G	intergenic_variant
Prunus mira	G2	Pp06	26903082	G2_B2-3-1	SNV:G>A	intergenic_variant
Prunus mira	G2	Pp06	27269639	G2_B2-1-1;G2_B2-1-2;G2_B2-1-3;G2_B2-2;G2_B2-3-1;G2_B2-3-2;G2_B2-4;G2_B2-5	INS:AGGTGTGTG	intergenic_variant
Prunus mira	G2	Pp06	29164986	G2_B2-5	SNV:G>T	intergenic_variant
Prunus mira	G2	Pp06	29349033	G2_B1-2-1;G2_B1-2-2	SNV:G>T	intron_variant
Prunus mira	G2	Pp07	501413	G2_B1-1-1;G2_B1-1-2	SNV:A>T	intergenic_variant
Prunus mira	G2	Pp07	2594675	G2_B1-2-1;G2_B1-2-2	SNV:G>A	intergenic_variant
Prunus mira	G2	Pp07	2837065	G2_B1-1-1	SNV:A>G	synonymous_variant
Prunus mira	G2	Pp07	4211881	G2_B2-1-3	INS:AT	intergenic_variant
Prunus mira	G2	Pp07	5136162	G2_B2-3-1;G2_B2-3-2;G2_B2-4	SNV:T>C	intergenic_variant
Prunus mira	G2	Pp07	6259431	G2_B2-3-1;G2_B2-3-2;G2_B2-4	SNV:C>T	intergenic_variant
Prunus mira	G2	Pp07	6342037	G2_B2-1-1;G2_B2-1-3;G2_B2-2;G2_B2-3-1;G2_B2-3-2;G2_B2-4;G2_B2-5	SNV:C>T	intron_variant
Prunus mira	G2	Pp07	7237457	G2_B1-1-1;G2_B1-1-2;G2_B1-2-1;G2_B1-2-2	SNV:G>T	intergenic_variant
Prunus mira	G2	Pp07	7777080	G2_B1-2-1	SNV:C>T	intergenic_variant
Prunus mira	G2	Pp07	8648421	G2_B2-1-1;G2_B2-1-2;G2_B2-1-3;G2_B2-2;G2_B2-3-1;G2_B2-3-2;G2_B2-4;G2_B2-5	SNV:C>T	intergenic_variant
Prunus mira	G2	Pp07	11345313	G2_B1-1-1	SNV:T>A	intergenic_variant
Prunus mira	G2	Pp07	12384173	G2_B1-1-1;G2_B1-1-2	SNV:C>G	intergenic_variant
Prunus mira	G2	Pp07	15075451	G2_B1-2-1;G2_B1-2-2	DEL:T	intergenic_variant
Prunus mira	G2	Pp07	15678279	G2_B2-4	SNV:T>G	intergenic_variant
Prunus mira	G2	Pp07	16460333	G2_B2-4	MNV:CC>TA	intergenic_variant
Prunus mira	G2	Pp07	18475026	G2_B2-3-2	DEL:A	intergenic_variant
Prunus mira	G2	Pp07	18890358	G2_B2-4	SNV:T>G	missense_variant
Prunus mira	G2	Pp07	19798970	G2_B2-4	INS:AG	5_prime_UTR_variant
Prunus mira	G2	Pp08	901774	G2_B2-1-1;G2_B2-1-2;G2_B2-1-3;G2_B2-2;G2_B2-3-1;G2_B2-3-2;G2_B2-4;G2_B2-5	SNV:C>T	intergenic_variant
Prunus mira	G2	Pp08	1151475	G2_B2-3-1	SNV:C>T	intergenic_variant
Prunus mira	G2	Pp08	1743095	G2_B2-3-2	SNV:A>C	intergenic_variant
Prunus mira	G2	Pp08	2549239	G2_B1-2-1	SNV:G>A	intergenic_variant
Prunus mira	G2	Pp08	2555793	G2_B1-1-1	SNV:C>T	intergenic_variant
Prunus mira	G2	Pp08	3431082	G2_B2-3-1;G2_B2-3-2;G2_B2-4	SNV:G>C	intergenic_variant
Prunus mira	G2	Pp08	4229493	G2_B1-1-1	INS:T	intergenic_variant
Prunus mira	G2	Pp08	4604160	G2_B1-1-1;G2_B1-1-2	SNV:G>A	3_prime_UTR_variant
Prunus mira	G2	Pp08	13831919	G2_B2-2	SNV:A>C	intergenic_variant
Prunus mira	G2	Pp08	16936946	G2_B1-1-1	SNV:T>G	intron_variant
Prunus mira	G2	Pp08	17663863	G2_B2-2	SNV:T>A	intergenic_variant
Prunus mira	GL2	Pp01	133687	GL2_B5-1-1;GL2_B5-1-2-L1-1	SNV:A>G	intergenic_variant
Prunus mira	GL2	Pp01	6732080	GL2_B3-1-1-L1-1;GL2_B3-1-2-L1-1;GL2_B3-2-1-FR;GL2_B3-2-1-L4-2;GL2_B3-2-2-FR;GL2_B3-2-2-L4-1	SNV:G>C	intergenic_variant
Prunus mira	GL2	Pp01	8578897	GL2_B5-2-2-1-FR	SNV:T>G	intron_variant
Prunus mira	GL2	Pp01	8843027	GL2_B4-2-1;GL2_B4-2-2-1;GL2_B4-2-2-2-L1-1	SNV:C>G	intron_variant
Prunus mira	GL2	Pp01	11442232	GL2_B5-2-2-1-FR	DEL:C	intergenic_variant
Prunus mira	GL2	Pp01	11483588	GL2_B1-2-1-FR	SNV:G>C	intergenic_variant
Prunus mira	GL2	Pp01	11581284	GL2_B1-1-1-1;GL2_B1-1-1-2;GL2_B1-1-1-2-FR;GL2_B1-2-1-L2-1;GL2_B1-2-2-FR;GL2_B1-2-2-L2-2;GL2_B1-1-2-1-L1-2;GL2_B1-1-2-2-L1-2	MNV:CG>TT	stop_gained
Prunus mira	GL2	Pp01	12984633	GL2_B2-1-L2-2;GL2_B2-2-1-2-L1-1;GL2_B2-2-2-L2-2	SNV:C>T	intergenic_variant
Prunus mira	GL2	Pp01	13240053	GL2_B1-1-1-1;GL2_B1-1-1-2;GL2_B1-1-1-2-FR;GL2_B1-2-1-L2-1;GL2_B1-2-2-FR;GL2_B1-2-2-L2-2;GL2_B1-1-2-1-L1-2;GL2_B1-1-2-2-L1-2	SNV:C>T	intergenic_variant
Prunus mira	GL2	Pp01	13271426	GL2_B2-2-1-1-2-FR	SNV:T>G	intergenic_variant
Prunus mira	GL2	Pp01	14617874	GL2_B2-2-1-1-1;GL2_B2-2-1-1-2-FR;GL2_B2-2-1-1-2-L2	SNV:A>C	intergenic_variant
Prunus mira	GL2	Pp01	15031216	GL2_B4-2-1;GL2_B4-1-1;GL2_B4-2-2-1;GL2_B5-1-1;GL2_B5-1-2-L1-1;GL2_B5-2-1-L2-2;GL2_B5-2-2-1-L2-2	SNV:A>T	intergenic_variant
Prunus mira	GL2	Pp01	16750872	GL2_B3-1-1-L1-1;GL2_B3-1-2-L1-1;GL2_B3-2-1-FR;GL2_B3-2-1-L4-2;GL2_B3-2-2-FR;GL2_B3-2-2-L4-1	INS:GGGCTA	inframe_insertion
Prunus mira	GL2	Pp01	17649718	GL2_B2-2-1-1-2-FR	SNV:A>T	3_prime_UTR_variant
Prunus mira	GL2	Pp01	17945591	GL2_B1-1-1-1;GL2_B1-1-1-2;GL2_B1-1-1-2-FR;GL2_B1-1-2-1-L1-2;GL2_B1-1-2-2-L1-2	SNV:G>A	intergenic_variant
Prunus mira	GL2	Pp01	20628014	GL2_B1-2-1-FR	SNV:G>A	intergenic_variant
Prunus mira	GL2	Pp01	20991194	GL2_B2-1-L2-2;GL2_B2-2-1-2-L1-1;GL2_B2-2-2-L2-2	SNV:C>T	intergenic_variant
Prunus mira	GL2	Pp01	22876185	GL2_B5-2-1-FR1	SNV:A>G	intergenic_variant
Prunus mira	GL2	Pp01	22896514	GL2_B1-1-1-1;GL2_B1-1-1-2;GL2_B1-2-1-FR;GL2_B1-2-1-L2-1;GL2_B1-2-2-FR;GL2_B1-2-2-L2-2;GL2_B1-1-2-1-L1-2;GL2_B1-1-2-2-L1-2	SNV:T>A	intergenic_variant
Prunus mira	GL2	Pp01	23809629	GL2_B5-2-2-1-L2-2	SNV:T>A	intron_variant
Prunus mira	GL2	Pp01	26755048	GL2_B4-2-1;GL2_B4-2-2-1;GL2_B4-2-2-2-L1-1	SNV:A>T	intergenic_variant
Prunus mira	GL2	Pp01	26794188	GL2_B1-1-1-1;GL2_B1-1-1-2;GL2_B1-2-1-FR;GL2_B1-2-1-L2-1;GL2_B1-2-2-L2-2;GL2_B1-1-2-1-L1-2;GL2_B1-1-2-2-L1-2	SNV:T>A	intergenic_variant
Prunus mira	GL2	Pp01	26797179	GL2_B3-1-1-L1-1;GL2_B3-1-2-L1-1;GL2_B3-2-1-L4-2;GL2_B3-2-2-FR	SNV:C>T	intergenic_variant
Prunus mira	GL2	Pp01	27208519	GL2_B1-1-1-1;GL2_B1-1-1-2;GL2_B1-2-1-FR;GL2_B1-2-1-L2-1;GL2_B1-2-2-L2-2;GL2_B1-1-2-1-L1-2;GL2_B1-1-2-2-L1-2	SNV:G>A	intergenic_variant
Prunus mira	GL2	Pp01	27933450	GL2_B3-1-1-L1-1;GL2_B3-1-2-L1-1;GL2_B3-2-1-FR;GL2_B3-2-1-L4-2;GL2_B3-2-2-L4-1	SNV:C>G	intron_variant
Prunus mira	GL2	Pp01	28889296	GL2_B2-1-L2-2;GL2_B2-2-1-1-1;GL2_B2-2-1-2-L1-1;GL2_B2-2-1-1-2-FR;GL2_B2-2-1-1-2-L2;GL2_B2-2-2-L2-2	SNV:A>G	intron_variant
Prunus mira	GL2	Pp01	30011332	GL2_B1-1-1-1;GL2_B1-1-1-2;GL2_B1-1-1-2-FR;GL2_B1-2-1-FR;GL2_B1-2-1-L2-1;GL2_B1-2-2-FR;GL2_B1-2-2-L2-2;GL2_B1-1-2-1-L1-2;GL2_B1-1-2-2-L1-2	SNV:A>G	intron_variant
Prunus mira	GL2	Pp01	31631986	GL2_B1-1-1-1;GL2_B1-1-1-2	SNV:A>G	intron_variant
Prunus mira	GL2	Pp01	32299893	GL2_B1-1-1-2-FR	SNV:T>C	synonymous_variant
Prunus mira	GL2	Pp01	32664408	GL2_B2-2-1-1-2-FR	SNV:C>A	stop_gained
Prunus mira	GL2	Pp01	33086771	GL2_B3-1-1-L1-1;GL2_B3-1-2-L1-1;GL2_B3-2-1-FR;GL2_B3-2-1-L4-2;GL2_B3-2-2-FR;GL2_B3-2-2-L4-1	SNV:T>G	3_prime_UTR_variant
Prunus mira	GL2	Pp01	33352706	GL2_B2-2-1-1-2-FR;GL2_B2-2-1-1-2-L2	SNV:T>G	missense_variant
Prunus mira	GL2	Pp01	33386338	GL2_B3-1-1-L1-1;GL2_B3-1-2-L1-1;GL2_B3-2-1-L4-2;GL2_B3-2-2-FR;GL2_B3-2-2-L4-1	INS:A	intergenic_variant
Prunus mira	GL2	Pp01	34873915	GL2_B2-2-1-2-L1-1	SNV:G>A	intergenic_variant
Prunus mira	GL2	Pp01	35314519	GL2_B5-1-1	SNV:G>A	intergenic_variant
Prunus mira	GL2	Pp01	37313617	GL2_B1-1-1-1;GL2_B1-1-1-2;GL2_B1-2-1-FR;GL2_B1-2-1-L2-1;GL2_B1-2-2-FR;GL2_B1-2-2-L2-2;GL2_B1-1-2-1-L1-2;GL2_B1-1-2-2-L1-2;GL2_B5-2-1-FR2;GL2_B2-1-L2-2;GL2_B2-2-1-1-1;GL2_B2-2-1-2-L1-1;GL2_B2-2-1-1-2-FR;GL2_B2-2-1-1-2-L2;GL2_B2-2-2-L2-2	SNV:C>G	missense_variant
Prunus mira	GL2	Pp01	40188037	GL2_B2-2-1-1-2-FR;GL2_B2-2-1-1-2-L2	SNV:C>T	missense_variant
Prunus mira	GL2	Pp01	40252674	GL2_B5-1-1	SNV:C>T	intergenic_variant
Prunus mira	GL2	Pp01	42445479	GL2_B5-2-2-2-FR;GL2_B5-1-1;GL2_B5-1-2-L1-1;GL2_B5-2-1-FR1;GL2_B5-2-1-FR2;GL2_B5-2-1-L2-2;GL2_B5-2-2-1-FR;GL2_B5-2-2-1-L2-2	INS:T	intergenic_variant
Prunus mira	GL2	Pp01	42997559	GL2_B5-2-2-1-FR	SNV:G>A	intergenic_variant
Prunus mira	GL2	Pp01	43207059	GL2_B5-2-2-1-FR	SNV:G>T	missense_variant
Prunus mira	GL2	Pp01	44127845	GL2_B4-2-2-1	DEL:C	intergenic_variant
Prunus mira	GL2	Pp01	44853502	GL2_B1-1-1-1;GL2_B1-1-1-2;GL2_B1-1-1-2-FR;GL2_B1-2-1-FR;GL2_B1-2-1-L2-1;GL2_B1-2-2-FR;GL2_B1-2-2-L2-2;GL2_B1-1-2-1-L1-2;GL2_B1-1-2-2-L1-2	SNV:A>G	intergenic_variant
Prunus mira	GL2	Pp01	46036763	GL2_B5-2-1-FR2	SNV:A>G	intron_variant
Prunus mira	GL2	Pp01	46675028	GL2_B4-1-1-FR2	SNV:G>T	intergenic_variant
Prunus mira	GL2	Pp01	46695035	GL2_B5-2-2-1-FR	SNV:T>A	intergenic_variant
Prunus mira	GL2	Pp02	1080923	GL2_B5-2-2-1-FR	SNV:A>T	missense_variant
Prunus mira	GL2	Pp02	2853317	GL2_B5-2-2-1-L2-2	SNV:C>T	intergenic_variant
Prunus mira	GL2	Pp02	2865438	GL2_B5-2-2-1-FR	SNV:A>C	intergenic_variant
Prunus mira	GL2	Pp02	3966373	GL2_B5-2-2-1-FR	SNV:T>C	intergenic_variant
Prunus mira	GL2	Pp02	4220689	GL2_B4-1-1;GL2_B4-1-1-FR2	SNV:A>G	intergenic_variant
Prunus mira	GL2	Pp02	4341679	GL2_B5-2-1-FR1;GL2_B5-2-1-FR2;GL2_B5-2-1-L2-2;GL2_B5-2-2-1-L2-2	SNV:G>A	intergenic_variant
Prunus mira	GL2	Pp02	4367258	GL2_B2-2-1-2-L1-1	SNV:T>G	intergenic_variant
Prunus mira	GL2	Pp02	6297104	GL2_B1-1-1-1;GL2_B1-1-1-2;GL2_B1-1-1-2-FR;GL2_B1-2-1-L2-1;GL2_B1-2-2-FR;GL2_B1-2-2-L2-2;GL2_B1-1-2-2-L1-2	SNV:A>G	intergenic_variant
Prunus mira	GL2	Pp02	8008863	GL2_B4-2-1;GL2_B4-2-2-1;GL2_B4-2-2-2-L1-1	SNV:G>A	intergenic_variant
Prunus mira	GL2	Pp02	10900255	GL2_B3-1-2-L1-1	INS:AAAATA	5_prime_UTR_variant
Prunus mira	GL2	Pp02	11355904	GL2_B4-2-2-1	SNV:C>A	intergenic_variant
Prunus mira	GL2	Pp02	11359828	GL2_B1-1-1-1	DEL:G	intergenic_variant
Prunus mira	GL2	Pp02	14516299	GL2_B2-2-1-1-2-L2	SNV:C>T	intergenic_variant
Prunus mira	GL2	Pp02	15949088	GL2_B3-1-1-L1-1;GL2_B3-1-2-L1-1;GL2_B3-2-1-FR;GL2_B3-2-1-L4-2;GL2_B3-2-2-L4-1	SNV:T>C	intergenic_variant
Prunus mira	GL2	Pp02	17437328	GL2_B4-1-1-FR2	SNV:T>A	intergenic_variant
Prunus mira	GL2	Pp02	17440015	GL2_B4-1-1-FR2	SNV:A>T	intergenic_variant
Prunus mira	GL2	Pp02	17809228	GL2_B4-1-1-FR2	INS:AT	intergenic_variant
Prunus mira	GL2	Pp02	19675488	GL2_B3-2-1-FR;GL2_B3-2-1-L4-2;GL2_B3-2-2-L4-1	SNV:G>A	5_prime_UTR_variant
Prunus mira	GL2	Pp02	20563320	GL2_B2-2-1-1-2-FR	RPL:GATAACAATTTCAATTTTAGTTTTTAGTTTTT>TTAGTTTTTA	intergenic_variant
Prunus mira	GL2	Pp02	21316195	GL2_B5-2-2-1-L2-2	DEL:GGGGGTGT	intron_variant
Prunus mira	GL2	Pp02	21890013	GL2_B2-1-L2-2;GL2_B2-2-1-2-L1-1;GL2_B2-2-2-L2-2	SNV:C>T	synonymous_variant
Prunus mira	GL2	Pp02	22857430	GL2_B3-1-2-L1-1	SNV:C>T	missense_variant
Prunus mira	GL2	Pp02	23263329	GL2_B4-2-1;GL2_B4-2-2-1;GL2_B4-2-2-2-L1-1	SNV:A>T	intergenic_variant
Prunus mira	GL2	Pp02	23346781	GL2_B3-1-1-L1-1;GL2_B3-1-2-L1-1;GL2_B3-2-1-FR;GL2_B3-2-1-L4-2;GL2_B3-2-2-FR;GL2_B3-2-2-L4-1	DEL:A	intergenic_variant
Prunus mira	GL2	Pp02	25403160	GL2_B4-2-1;GL2_B4-2-2-1;GL2_B4-2-2-2-L1-1	SNV:C>G	intergenic_variant
Prunus mira	GL2	Pp02	26650835	GL2_B3-1-1-L1-1;GL2_B3-1-2-L1-1;GL2_B3-2-1-FR;GL2_B3-2-1-L4-2;GL2_B3-2-2-FR;GL2_B3-2-2-L4-1	SNV:T>A	missense_variant
Prunus mira	GL2	Pp02	27501486	GL2_B2-2-1-1-1;GL2_B2-2-1-2-L1-1;GL2_B2-2-1-1-2-L2;GL2_B2-2-2-L2-2	SNV:G>T	intergenic_variant
Prunus mira	GL2	Pp02	28307362	GL2_B2-2-1-1-1;GL2_B2-2-1-1-2-FR;GL2_B2-2-1-1-2-L2	DEL:GAGAGAGAGA	intergenic_variant
Prunus mira	GL2	Pp02	28336366	GL2_B4-2-2-2-L1-1	SNV:A>G	synonymous_variant
Prunus mira	GL2	Pp02	28625739	GL2_B5-1-1;GL2_B5-1-2-L1-1;GL2_B5-2-1-L2-2;GL2_B5-2-2-1-L2-2	DEL:GCACAA	intergenic_variant
Prunus mira	GL2	Pp02	28777414	GL2_B5-2-1-FR2	INS:TA	intron_variant
Prunus mira	GL2	Pp03	1973944	GL2_B1-1-1-1;GL2_B1-1-1-2;GL2_B1-1-1-2-FR;GL2_B1-1-2-1-L1-2;GL2_B1-1-2-2-L1-2	SNV:C>G	intergenic_variant
Prunus mira	GL2	Pp03	5242278	GL2_B3-2-1-L4-2;GL2_B3-2-2-L4-1	SNV:G>A	intergenic_variant
Prunus mira	GL2	Pp03	5606168	GL2_B3-1-1-L1-1;GL2_B3-1-2-L1-1;GL2_B3-2-1-FR;GL2_B3-2-1-L4-2;GL2_B3-2-2-FR;GL2_B3-2-2-L4-1	SNV:G>T	intergenic_variant
Prunus mira	GL2	Pp03	6031313	GL2_B5-1-1;GL2_B5-1-2-L1-1;GL2_B5-2-1-L2-2;GL2_B5-2-2-1-L2-2	SNV:T>A	intergenic_variant
Prunus mira	GL2	Pp03	6892231	GL2_B5-2-2-2-FR;GL2_B5-1-1;GL2_B5-1-2-L1-1;GL2_B5-2-1-FR1;GL2_B5-2-1-L2-2;GL2_B5-2-2-1-FR;GL2_B5-2-2-1-L2-2	SNV:A>C	intergenic_variant
Prunus mira	GL2	Pp03	8941230	GL2_B3-2-1-FR;GL2_B3-2-1-L4-2;GL2_B3-2-2-FR;GL2_B3-2-2-L4-1	SNV:C>T	intergenic_variant
Prunus mira	GL2	Pp03	9777433	GL2_B1-2-1-FR;GL2_B1-2-1-L2-1	SNV:G>T	intergenic_variant
Prunus mira	GL2	Pp03	11226970	GL2_B4-1-1	SNV:T>G	intergenic_variant
Prunus mira	GL2	Pp03	13523177	GL2_B1-1-1-2-FR	MNV:GA>TT	intergenic_variant
Prunus mira	GL2	Pp03	14901575	GL2_B5-1-1;GL2_B5-1-2-L1-1	SNV:G>A	intergenic_variant
Prunus mira	GL2	Pp03	15540783	GL2_B3-1-1-L1-1	SNV:C>T	intergenic_variant
Prunus mira	GL2	Pp03	15594437	GL2_B1-2-2-FR	SNV:G>A	intergenic_variant
Prunus mira	GL2	Pp03	15847630	GL2_B5-1-1;GL2_B5-1-2-L1-1;GL2_B5-2-1-FR1;GL2_B5-2-1-FR2;GL2_B5-2-1-L2-2;GL2_B5-2-2-1-FR;GL2_B5-2-2-1-L2-2	SNV:A>G	intron_variant
Prunus mira	GL2	Pp03	16204103	GL2_B5-2-1-FR2;GL2_B2-1-L2-2;GL2_B2-2-1-1-1;GL2_B2-2-1-2-L1-1;GL2_B2-2-1-1-2-FR;GL2_B2-2-1-1-2-L2;GL2_B2-2-2-L2-2	SNV:G>A	intron_variant
Prunus mira	GL2	Pp03	16689848	GL2_B4-1-1;GL2_B4-1-1-FR2	SNV:G>A	intergenic_variant
Prunus mira	GL2	Pp03	17901351	GL2_B1-1-1-1;GL2_B1-1-1-2;GL2_B1-1-1-2-FR;GL2_B1-2-1-L2-1;GL2_B1-2-2-L2-2;GL2_B1-1-2-1-L1-2;GL2_B1-1-2-2-L1-2	SNV:G>A	synonymous_variant
Prunus mira	GL2	Pp03	18978588	GL2_B1-2-2-FR	SNV:G>A	intergenic_variant
Prunus mira	GL2	Pp03	20783775	GL2_B1-1-1-1;GL2_B1-1-1-2;GL2_B1-1-2-1-L1-2	SNV:T>C	missense_variant
Prunus mira	GL2	Pp03	21749768	GL2_B4-1-1;GL2_B4-1-1-FR2	SNV:A>C	3_prime_UTR_variant
Prunus mira	GL2	Pp03	23597041	GL2_B4-2-1;GL2_B4-2-2-2-L1-1	SNV:C>T	synonymous_variant
Prunus mira	GL2	Pp03	25157640	GL2_B3-1-1-L1-1;GL2_B3-1-2-L1-1;GL2_B3-2-1-FR;GL2_B3-2-1-L4-2;GL2_B3-2-2-L4-1	DEL:CA	3_prime_UTR_variant
Prunus mira	GL2	Pp04	1089379	GL2_B1-1-1-1	SNV:T>C	3_prime_UTR_variant
Prunus mira	GL2	Pp04	1626530	GL2_B4-2-1;GL2_B4-1-1;GL2_B4-2-2-1;GL2_B4-2-2-2-L1-1	SNV:A>T	missense_variant
Prunus mira	GL2	Pp04	2950150	GL2_B4-2-1;GL2_B4-1-1;GL2_B4-2-2-1;GL2_B5-1-1;GL2_B5-2-2-1-L2-2	SNV:C>T	missense_variant
Prunus mira	GL2	Pp04	5236328	GL2_B1-2-1-FR;GL2_B1-2-1-L2-1;GL2_B1-2-2-FR;GL2_B1-2-2-L2-2	SNV:G>A	intergenic_variant
Prunus mira	GL2	Pp04	7039502	GL2_B2-2-1-1-1;GL2_B2-2-1-1-2-L2	SNV:C>G	intergenic_variant
Prunus mira	GL2	Pp04	10906291	GL2_B1-2-2-FR;GL2_B1-2-2-L2-2	SNV:G>A	intergenic_variant
Prunus mira	GL2	Pp04	17535221	GL2_B3-1-1-L1-1;GL2_B3-1-2-L1-1	SNV:G>A	intergenic_variant
Prunus mira	GL2	Pp04	18682190	GL2_B3-2-1-FR;GL2_B3-2-1-L4-2;GL2_B3-2-2-FR;GL2_B3-2-2-L4-1	SNV:G>T	intergenic_variant
Prunus mira	GL2	Pp04	20159301	GL2_B1-1-1-1;GL2_B1-1-1-2;GL2_B1-1-1-2-FR;GL2_B1-1-2-1-L1-2;GL2_B1-1-2-2-L1-2	SNV:T>G	intergenic_variant
Prunus mira	GL2	Pp04	22635078	GL2_B5-2-2-2-FR;GL2_B5-1-1;GL2_B5-1-2-L1-1;GL2_B5-2-1-FR1;GL2_B5-2-1-FR2;GL2_B5-2-1-L2-2;GL2_B5-2-2-1-L2-2	SNV:G>T	intergenic_variant
Prunus mira	GL2	Pp04	23226924	GL2_B2-2-1-1-2-FR;GL2_B2-2-1-1-2-L2	SNV:G>A	intergenic_variant
Prunus mira	GL2	Pp04	23812997	GL2_B1-2-1-L2-1	SNV:T>A	intergenic_variant
Prunus mira	GL2	Pp04	25177204	GL2_B2-2-1-1-1	SNV:C>T	intron_variant
Prunus mira	GL2	Pp04	25351252	GL2_B1-1-1-2-FR	DEL:ATG	intron_variant
Prunus mira	GL2	Pp04	25367897	GL2_B3-1-1-L1-1;GL2_B3-1-2-L1-1;GL2_B3-2-1-FR;GL2_B3-2-1-L4-2;GL2_B3-2-2-L4-1	SNV:G>T	intergenic_variant
Prunus mira	GL2	Pp05	149228	GL2_B1-1-1-1;GL2_B1-1-1-2;GL2_B1-1-1-2-FR;GL2_B1-2-1-L2-1;GL2_B1-2-2-L2-2;GL2_B1-1-2-1-L1-2;GL2_B1-1-2-2-L1-2	SNV:C>T	intergenic_variant
Prunus mira	GL2	Pp05	701538	GL2_B1-2-2-FR	SNV:G>A	intergenic_variant
Prunus mira	GL2	Pp05	3018378	GL2_B5-2-1-FR2;GL2_B2-1-L2-2;GL2_B2-2-1-1-1;GL2_B2-2-1-2-L1-1;GL2_B2-2-1-1-2-FR;GL2_B2-2-1-1-2-L2;GL2_B2-2-2-L2-2	SNV:G>A	intergenic_variant
Prunus mira	GL2	Pp05	3807979	GL2_B5-2-2-1-L2-2	SNV:C>A	intergenic_variant
Prunus mira	GL2	Pp05	5209281	GL2_B3-2-1-L4-2	SNV:G>C	intergenic_variant
Prunus mira	GL2	Pp05	9875131	GL2_B1-1-1-2-FR	SNV:A>C	intergenic_variant
Prunus mira	GL2	Pp05	9880311	GL2_B1-1-1-2-FR	DEL:ATCCGG	intergenic_variant
Prunus mira	GL2	Pp05	11157532	GL2_B2-2-1-1-1;GL2_B2-2-1-1-2-FR;GL2_B2-2-1-1-2-L2	MNV:GA>TC	intergenic_variant
Prunus mira	GL2	Pp05	11254859	GL2_B3-2-2-FR	SNV:G>A	intergenic_variant
Prunus mira	GL2	Pp05	11500104	GL2_B1-1-1-1;GL2_B1-1-1-2;GL2_B1-1-1-2-FR;GL2_B1-1-2-1-L1-2;GL2_B1-1-2-2-L1-2	SNV:T>G	missense_variant
Prunus mira	GL2	Pp05	12162597	GL2_B4-1-1-FR2	SNV:C>T	missense_variant
Prunus mira	GL2	Pp05	13851604	GL2_B1-2-2-FR;GL2_B1-2-2-L2-2	SNV:C>T	intergenic_variant
Prunus mira	GL2	Pp05	15137772	GL2_B1-1-1-1;GL2_B1-1-1-2;GL2_B1-1-1-2-FR;GL2_B1-2-1-L2-1;GL2_B1-2-2-FR;GL2_B1-2-2-L2-2;GL2_B1-1-2-1-L1-2;GL2_B1-1-2-2-L1-2	SNV:T>A	3_prime_UTR_variant
Prunus mira	GL2	Pp05	17029575	GL2_B3-2-2-FR	SNV:G>A	intergenic_variant
Prunus mira	GL2	Pp05	17963607	GL2_B3-2-2-FR	SNV:T>C	synonymous_variant
Prunus mira	GL2	Pp06	544204	GL2_B5-1-1;GL2_B5-1-2-L1-1	SNV:T>G	intergenic_variant
Prunus mira	GL2	Pp06	1503217	GL2_B1-1-1-1;GL2_B1-1-1-2;GL2_B1-1-1-2-FR;GL2_B1-1-2-1-L1-2;GL2_B1-1-2-2-L1-2	SNV:A>G	intergenic_variant
Prunus mira	GL2	Pp06	7026916	GL2_B4-2-1;GL2_B4-1-1;GL2_B5-2-2-2-FR;GL2_B4-2-2-1;GL2_B4-2-2-2-L1-1;GL2_B5-1-1;GL2_B5-1-2-L1-1;GL2_B5-2-1-FR1;GL2_B5-2-1-L2-2;GL2_B5-2-2-1-L2-2	SNV:G>T	intergenic_variant
Prunus mira	GL2	Pp06	8217269	GL2_B1-2-2-FR	SNV:C>A	intergenic_variant
Prunus mira	GL2	Pp06	8417295	GL2_B4-2-1;GL2_B4-2-2-1;GL2_B4-2-2-2-L1-1	SNV:C>T	intron_variant
Prunus mira	GL2	Pp06	8792939	GL2_B4-1-1	SNV:C>A	intergenic_variant
Prunus mira	GL2	Pp06	9097059	GL2_B1-1-1-1;GL2_B1-1-1-2;GL2_B1-1-1-2-FR	SNV:C>A	intergenic_variant
Prunus mira	GL2	Pp06	9161504	GL2_B4-1-1	DEL:TC	5_prime_UTR_variant
Prunus mira	GL2	Pp06	9690825	GL2_B5-2-2-2-FR;GL2_B5-1-1;GL2_B5-2-1-FR1;GL2_B5-2-1-FR2;GL2_B5-2-2-1-L2-2	SNV:C>T	intergenic_variant
Prunus mira	GL2	Pp06	9822637	GL2_B5-2-1-FR1	SNV:C>A	intron_variant
Prunus mira	GL2	Pp06	10085226	GL2_B5-2-2-2-FR;GL2_B5-2-1-FR1;GL2_B5-2-1-L2-2;GL2_B5-2-2-1-L2-2	SNV:G>C	intergenic_variant
Prunus mira	GL2	Pp06	10147843	GL2_B5-2-1-FR2	SNV:T>C	intergenic_variant
Prunus mira	GL2	Pp06	10880588	GL2_B2-2-1-1-1;GL2_B2-2-1-1-2-FR;GL2_B2-2-1-1-2-L2	SNV:G>A	intergenic_variant
Prunus mira	GL2	Pp06	11412489	GL2_B4-2-1;GL2_B4-1-1;GL2_B4-1-1-FR2;GL2_B4-2-2-1;GL2_B4-2-2-2-L1-1	SNV:G>A	intergenic_variant
Prunus mira	GL2	Pp06	14488212	GL2_B3-1-1-L1-1;GL2_B3-1-2-L1-1;GL2_B3-2-2-FR;GL2_B3-2-2-L4-1	SNV:T>C	intergenic_variant
Prunus mira	GL2	Pp06	15057080	GL2_B3-1-1-L1-1;GL2_B3-1-2-L1-1	SNV:C>T	stop_gained
Prunus mira	GL2	Pp06	15346055	GL2_B2-1-L2-2;GL2_B2-2-1-1-1;GL2_B2-2-1-2-L1-1;GL2_B2-2-1-1-2-FR;GL2_B2-2-1-1-2-L2;GL2_B2-2-2-L2-2	INS:A	intergenic_variant
Prunus mira	GL2	Pp06	16823169	GL2_B3-1-1-L1-1;GL2_B3-1-2-L1-1;GL2_B3-2-1-L4-2;GL2_B3-2-2-FR;GL2_B3-2-2-L4-1	SNV:C>A	intergenic_variant
Prunus mira	GL2	Pp06	17848300	GL2_B5-2-2-1-FR	DEL:TCTCTCTCTCTCTCTCTC	intergenic_variant
Prunus mira	GL2	Pp06	20292645	GL2_B1-1-1-1;GL2_B1-1-1-2;GL2_B1-1-1-2-FR;GL2_B1-2-1-FR;GL2_B1-2-1-L2-1;GL2_B1-2-2-FR;GL2_B1-2-2-L2-2;GL2_B1-1-2-1-L1-2;GL2_B1-1-2-2-L1-2	SNV:G>A	intergenic_variant
Prunus mira	GL2	Pp06	21287526	GL2_B3-2-1-FR	SNV:T>A	intergenic_variant
Prunus mira	GL2	Pp06	22535233	GL2_B1-2-2-L2-2	SNV:A>T	intron_variant
Prunus mira	GL2	Pp06	24383555	GL2_B2-2-1-1-1;GL2_B2-2-1-1-2-FR;GL2_B2-2-1-1-2-L2	DEL:GTCA	frameshift_variant
Prunus mira	GL2	Pp06	24883610	GL2_B5-2-1-FR1	SNV:G>T	intergenic_variant
Prunus mira	GL2	Pp06	26309457	GL2_B1-1-1-2-FR	SNV:G>T	intergenic_variant
Prunus mira	GL2	Pp06	26392735	GL2_B4-2-1;GL2_B4-2-2-1;GL2_B4-2-2-2-L1-1	SNV:T>C	5_prime_UTR_variant
Prunus mira	GL2	Pp06	27569306	GL2_B1-1-2-2-L1-2	SNV:G>T	intergenic_variant
Prunus mira	GL2	Pp07	721434	GL2_B5-2-1-FR2	SNV:A>T	intergenic_variant
Prunus mira	GL2	Pp07	2470838	GL2_B3-1-1-L1-1;GL2_B3-2-1-L4-2;GL2_B3-2-2-L4-1	SNV:A>G	intergenic_variant
Prunus mira	GL2	Pp07	2532162	GL2_B4-2-1;GL2_B4-2-2-1;GL2_B4-2-2-2-L1-1	SNV:G>A	intergenic_variant
Prunus mira	GL2	Pp07	2825976	GL2_B3-2-1-FR	SNV:T>A	intergenic_variant
Prunus mira	GL2	Pp07	3109826	GL2_B2-1-L2-2;GL2_B2-2-1-2-L1-1;GL2_B2-2-2-L2-2	SNV:C>T	intergenic_variant
Prunus mira	GL2	Pp07	3465824	GL2_B4-1-1-FR2	SNV:C>T	intergenic_variant
Prunus mira	GL2	Pp07	5187607	GL2_B1-1-1-1;GL2_B1-1-1-2;GL2_B1-1-1-2-FR;GL2_B1-2-1-FR;GL2_B1-2-1-L2-1;GL2_B1-2-2-FR;GL2_B1-2-2-L2-2;GL2_B1-1-2-1-L1-2;GL2_B1-1-2-2-L1-2	SNV:T>C	intergenic_variant
Prunus mira	GL2	Pp07	5331322	GL2_B4-2-1;GL2_B4-2-2-1;GL2_B4-2-2-2-L1-1	SNV:G>T	intergenic_variant
Prunus mira	GL2	Pp07	7547698	GL2_B3-2-1-FR	SNV:C>T	intergenic_variant
Prunus mira	GL2	Pp07	7897007	GL2_B1-2-2-FR	SNV:G>A	intergenic_variant
Prunus mira	GL2	Pp07	13773954	GL2_B3-1-1-L1-1;GL2_B3-1-2-L1-1;GL2_B3-2-1-L4-2;GL2_B3-2-2-FR;GL2_B3-2-2-L4-1	SNV:G>T	intron_variant
Prunus mira	GL2	Pp07	16550266	GL2_B3-1-1-L1-1;GL2_B3-1-2-L1-1;GL2_B3-2-1-FR;GL2_B3-2-1-L4-2;GL2_B3-2-2-L4-1	SNV:T>C	missense_variant
Prunus mira	GL2	Pp07	18093004	GL2_B4-1-1-FR2	SNV:T>C	missense_variant
Prunus mira	GL2	Pp07	20902798	GL2_B2-2-1-1-1;GL2_B2-2-1-1-2-FR;GL2_B2-2-1-1-2-L2	SNV:C>T	synonymous_variant
Prunus mira	GL2	Pp07	21907078	GL2_B5-2-2-2-FR;GL2_B5-1-1;GL2_B5-1-2-L1-1;GL2_B5-2-1-FR1;GL2_B5-2-1-L2-2;GL2_B5-2-2-1-FR;GL2_B5-2-2-1-L2-2	SNV:G>A	synonymous_variant
Prunus mira	GL2	Pp08	1705587	GL2_B3-2-1-FR	SNV:G>A	intergenic_variant
Prunus mira	GL2	Pp08	8117326	GL2_B1-1-1-1;GL2_B1-1-1-2;GL2_B1-1-1-2-FR;GL2_B1-2-1-FR;GL2_B1-2-2-FR;GL2_B1-2-2-L2-2;GL2_B1-1-2-1-L1-2;GL2_B1-1-2-2-L1-2	SNV:A>T	intergenic_variant
Prunus mira	GL2	Pp08	10494514	GL2_B1-1-1-1;GL2_B1-1-1-2;GL2_B1-2-1-FR;GL2_B1-2-1-L2-1;GL2_B1-2-2-FR;GL2_B1-1-2-1-L1-2;GL2_B1-1-2-2-L1-2	SNV:C>T	intergenic_variant
Prunus mira	GL2	Pp08	10639223	GL2_B1-1-1-1;GL2_B1-2-2-L2-2;GL2_B1-1-2-2-L1-2	INS:AC	3_prime_UTR_variant
Prunus mira	GL2	Pp08	12902112	GL2_B1-1-1-1;GL2_B1-1-1-2;GL2_B1-1-1-2-FR;GL2_B1-2-1-FR;GL2_B1-2-1-L2-1;GL2_B1-2-2-L2-2;GL2_B1-1-2-1-L1-2;GL2_B1-1-2-2-L1-2	SNV:C>A	intron_variant
Prunus mira	GL2	Pp08	15798349	GL2_B5-2-1-FR2	SNV:C>T	intergenic_variant
Prunus mira	GL2	Pp08	17120477	GL2_B1-1-1-2-FR	SNV:G>T	intergenic_variant
Prunus mira	GL2	Pp08	17124450	GL2_B1-2-1-FR;GL2_B1-2-1-L2-1;GL2_B1-2-2-FR;GL2_B1-2-2-L2-2	SNV:G>C	intergenic_variant
Prunus mira	GL2	Pp08	18609169	GL2_B1-1-1-1	SNV:C>T	intergenic_variant
Prunus mira	GL2	Pp08	18872636	GL2_B1-1-1-1;GL2_B1-1-1-2;GL2_B1-2-1-FR;GL2_B1-2-1-L2-1;GL2_B1-2-2-FR;GL2_B1-2-2-L2-2;GL2_B1-1-2-1-L1-2;GL2_B1-1-2-2-L1-2	SNV:C>T	missense_variant
Prunus mira	GL2	Pp08	18935901	GL2_B3-1-1-L1-1;GL2_B3-1-2-L1-1;GL2_B3-2-1-FR;GL2_B3-2-1-L4-2;GL2_B3-2-2-FR;GL2_B3-2-2-L4-1	SNV:C>A	intron_variant
Prunus mira	GL2	Pp08	19935130	GL2_B5-2-1-FR2	SNV:G>A	intron_variant
Prunus mira	GZ	Pp01	4164501	GZ-5	SNV:C>A	intergenic_variant
Prunus mira	GZ	Pp01	5779775	GZ-7	SNV:A>C	intergenic_variant
Prunus mira	GZ	Pp01	6339685	GZ-7	DEL:AT	intron_variant
Prunus mira	GZ	Pp01	7506868	GZ-1;GZ-2;GZ-3;GZ-6	DEL:AGAGAGAG	intergenic_variant
Prunus mira	GZ	Pp01	8949118	GZ-3	SNV:C>T	intergenic_variant
Prunus mira	GZ	Pp01	9682287	GZ-5	SNV:G>A	intron_variant
Prunus mira	GZ	Pp01	18101408	GZ-5	SNV:G>A	intergenic_variant
Prunus mira	GZ	Pp01	22796998	GZ-5	MNV:AA>TT	intron_variant
Prunus mira	GZ	Pp01	23983301	GZ-4	SNV:C>T	intergenic_variant
Prunus mira	GZ	Pp01	24689376	GZ-9	SNV:A>G	intergenic_variant
Prunus mira	GZ	Pp01	25506400	GZ-1	SNV:C>T	intergenic_variant
Prunus mira	GZ	Pp01	26662547	GZ-2	SNV:G>T	intron_variant
Prunus mira	GZ	Pp01	29563834	GZ-9	SNV:G>A	intergenic_variant
Prunus mira	GZ	Pp01	29783909	GZ-7	SNV:C>T	intergenic_variant
Prunus mira	GZ	Pp01	30379216	GZ-7	SNV:G>A	intergenic_variant
Prunus mira	GZ	Pp01	33712686	GZ-4	SNV:A>T	intron_variant
Prunus mira	GZ	Pp01	34165367	GZ-5;GZ-8;GZ-9	DEL:A	intergenic_variant
Prunus mira	GZ	Pp01	35118311	GZ-1;GZ-3;GZ-6	SNV:A>G	3_prime_UTR_variant
Prunus mira	GZ	Pp01	36964684	GZ-6	SNV:A>C	intron_variant
Prunus mira	GZ	Pp01	37508062	GZ-5;GZ-9	SNV:A>G	5_prime_UTR_variant
Prunus mira	GZ	Pp01	37567987	GZ-2	SNV:C>T	intergenic_variant
Prunus mira	GZ	Pp01	38059312	GZ-5	INS:A	intergenic_variant
Prunus mira	GZ	Pp01	39650781	GZ-6	SNV:G>A	intergenic_variant
Prunus mira	GZ	Pp01	44264396	GZ-1	SNV:A>T	intergenic_variant
Prunus mira	GZ	Pp01	47188899	GZ-1;GZ-2;GZ-3;GZ-6	SNV:G>A	intergenic_variant
Prunus mira	GZ	Pp01	47661931	GZ-5	DEL:TA	3_prime_UTR_variant
Prunus mira	GZ	Pp02	7471017	GZ-2	INS:AG	intergenic_variant
Prunus mira	GZ	Pp02	8221134	GZ-4	SNV:C>T	intergenic_variant
Prunus mira	GZ	Pp02	10490318	GZ-4	SNV:T>C	intergenic_variant
Prunus mira	GZ	Pp02	15498756	GZ-1;GZ-2;GZ-3;GZ-6	SNV:G>T	missense_variant
Prunus mira	GZ	Pp02	17205045	GZ-5;GZ-8;GZ-9	INS:TC	intergenic_variant
Prunus mira	GZ	Pp02	17968356	GZ-2	DEL:AGAGAGAGAGAGAGAGAGAGAG	intergenic_variant
Prunus mira	GZ	Pp02	19083369	GZ-4;GZ-5;GZ-7;GZ-8;GZ-9	SNV:C>A	5_prime_UTR_variant
Prunus mira	GZ	Pp02	26925136	GZ-7	SNV:G>A	synonymous_variant
Prunus mira	GZ	Pp02	27379700	GZ-5;GZ-8;GZ-9	SNV:C>A	missense_variant
Prunus mira	GZ	Pp02	27515309	GZ-4;GZ-5;GZ-7;GZ-8;GZ-9	SNV:A>T	intron_variant
Prunus mira	GZ	Pp02	29812237	GZ-7	SNV:A>G	intron_variant
Prunus mira	GZ	Pp03	3435658	GZ-5;GZ-8;GZ-9	INS:GA	intergenic_variant
Prunus mira	GZ	Pp03	3440506	GZ-3	SNV:T>C	intergenic_variant
Prunus mira	GZ	Pp03	4841626	GZ-3	DEL:TCCATCCGTCCATCCG	intergenic_variant
Prunus mira	GZ	Pp03	8099785	GZ-9	SNV:G>T	intergenic_variant
Prunus mira	GZ	Pp03	9116330	GZ-5;GZ-8;GZ-9	SNV:G>A	intergenic_variant
Prunus mira	GZ	Pp03	10104812	GZ-4;GZ-5;GZ-7;GZ-8;GZ-9	SNV:G>A	intergenic_variant
Prunus mira	GZ	Pp03	18637049	GZ-3	DEL:TCTCTCTCTCTCTCTCTCTC	intergenic_variant
Prunus mira	GZ	Pp03	21674328	GZ-7	SNV:A>T	5_prime_UTR_variant
Prunus mira	GZ	Pp03	27245791	GZ-2	SNV:C>T	missense_variant
Prunus mira	GZ	Pp04	598473	GZ-2	SNV:T>C	5_prime_UTR_variant
Prunus mira	GZ	Pp04	1182089	GZ-6	INS:CT	5_prime_UTR_variant
Prunus mira	GZ	Pp04	5708578	GZ-5;GZ-8	SNV:C>T	3_prime_UTR_variant
Prunus mira	GZ	Pp04	6954879	GZ-7	SNV:C>T	intergenic_variant
Prunus mira	GZ	Pp04	12946945	GZ-2	SNV:C>A	intron_variant
Prunus mira	GZ	Pp04	20956142	GZ-6	SNV:G>A	intergenic_variant
Prunus mira	GZ	Pp04	21362526	GZ-4	SNV:A>C	intergenic_variant
Prunus mira	GZ	Pp04	23273511	GZ-5;GZ-8;GZ-9	SNV:G>A	intergenic_variant
Prunus mira	GZ	Pp05	2980622	GZ-8	DEL:AGAGAGAGAGAG	intron_variant
Prunus mira	GZ	Pp05	4280615	GZ-2	SNV:T>A	intergenic_variant
Prunus mira	GZ	Pp05	5125921	GZ-2	SNV:G>T	intergenic_variant
Prunus mira	GZ	Pp05	17812767	GZ-8	SNV:T>C	intron_variant
Prunus mira	GZ	Pp06	3868540	GZ-4	SNV:A>T	intron_variant
Prunus mira	GZ	Pp06	4461962	GZ-3	DEL:CAGACCATTGAAATC	intergenic_variant
Prunus mira	GZ	Pp06	5425189	GZ-9	INS:G	intergenic_variant
Prunus mira	GZ	Pp06	7796723	GZ-7	SNV:G>A	intergenic_variant
Prunus mira	GZ	Pp06	9133787	GZ-2	SNV:G>A	intron_variant
Prunus mira	GZ	Pp06	21858922	GZ-4	SNV:T>C	intergenic_variant
Prunus mira	GZ	Pp07	1315417	GZ-5	SNV:G>T	intergenic_variant
Prunus mira	GZ	Pp07	1883685	GZ-4;GZ-7	DEL:CTCTCTCT	5_prime_UTR_variant
Prunus mira	GZ	Pp07	4350918	GZ-4	SNV:G>A	intergenic_variant
Prunus mira	GZ	Pp07	7686291	GZ-4	SNV:G>A	intergenic_variant
Prunus mira	GZ	Pp07	11423068	GZ-5	SNV:C>A	synonymous_variant
Prunus mira	GZ	Pp07	13549659	GZ-7	SNV:T>G	intergenic_variant
Prunus mira	GZ	Pp07	17210262	GZ-8	DEL:ACAGTTCAC	intron_variant
Prunus mira	GZ	Pp07	19292797	GZ-2	DEL:G	intron_variant
Prunus mira	GZ	Pp08	10351249	GZ-5;GZ-8	SNV:A>C	intergenic_variant
Prunus mira	GZ	Pp08	10629269	GZ-9	SNV:C>T	intron_variant
Prunus mira	GZ	Pp08	12327274	GZ-1	SNV:G>A	missense_variant
Prunus mira	GZ	Pp08	17408141	GZ-2	SNV:G>A	intron_variant
Prunus mume	MHG1	Pm1	1218162	M1_R6-2-2-1	SNV:C>T	intergenic_variant
Prunus mume	MHG1	Pm1	2119460	M1_B3-1-1-1;M1_B3-1-1-5;M1_B3-1-2	INS:AT	intron_variant
Prunus mume	MHG1	Pm1	2831135	M1_R10-2;M1_R11-1-1;M1_R11-1M;M1_R11-2-1;M1_R9-1Mb	SNV:C>T	intergenic_variant
Prunus mume	MHG1	Pm1	3230346	M1_R1-2-2-2;M1_R1-2-2-3;M1_R1-2-2Mb	SNV:A>C	intergenic_variant
Prunus mume	MHG1	Pm1	3571110	M1_R11-2-1	SNV:T>A	intergenic_variant
Prunus mume	MHG1	Pm1	3835082	M1_R1-2-2-2;M1_R1-2-2-3;M1_R1-2-2Mb	SNV:G>A	intergenic_variant
Prunus mume	MHG1	Pm1	3845884	M1_B2-5-1;M1_B2-5-2;M1_B2-5-3	INS:T	intergenic_variant
Prunus mume	MHG1	Pm1	3894139	M1_R1-2-2-2;M1_R1-2-2-3;M1_R1-2-2Mb	SNV:G>A	intergenic_variant
Prunus mume	MHG1	Pm1	4239419	M1_B3-1-1-1;M1_B3-1-1-2;M1_B3-1-1-3;M1_B3-1-1-4;M1_B3-1-1-5;M1_B3-1-2	SNV:C>A	intergenic_variant
Prunus mume	MHG1	Pm1	4501909	M1_R10-2	DEL:G	intron_variant
Prunus mume	MHG1	Pm1	4942829	M1_R8-1-1	SNV:A>T	intergenic_variant
Prunus mume	MHG1	Pm1	5380797	M1_B2-5-1;M1_B2-5-2;M1_B2-5-3	SNV:G>C	intergenic_variant
Prunus mume	MHG1	Pm1	6057730	M1_R1-2-2-2;M1_R1-2-2-3;M1_R1-2-2Ma;M1_R1-2-2Mb;M1_R1-2M	SNV:G>A	intergenic_variant
Prunus mume	MHG1	Pm1	6213961	M1_R4-2	SNV:C>T	intergenic_variant
Prunus mume	MHG1	Pm1	6712552	M1_B2-1	SNV:A>C	intergenic_variant
Prunus mume	MHG1	Pm1	6855012	M1_B1-1-1;M1_B1-1-2;M1_B1-2-1-1;M1_B1-2-1-2;M1_B1-2-2;M1_B1-2-T2-1;M1_B1-2-T2-2	SNV:T>C	missense_variant
Prunus mume	MHG1	Pm1	6870111	M1_R1-1-1;M1_R1-1-2;M1_R1-1-3;M1_R1-1Ma;M1_R1-1Mb;M1_R1-1Mc;M1_R1-2-2-1;M1_R1-2-2-2;M1_R1-2-2-3;M1_R1-2-2Ma;M1_R1-2-2Mb;M1_R1-2M	SNV:T>C	intron_variant
Prunus mume	MHG1	Pm1	7062753	M1_B2-4-1	SNV:T>G	intergenic_variant
Prunus mume	MHG1	Pm1	7903049	M1_R10-2	SNV:G>A	intergenic_variant
Prunus mume	MHG1	Pm1	8133665	M1_B2-3-1;M1_B2-3-2	SNV:G>A	intergenic_variant
Prunus mume	MHG1	Pm1	8278970	M1_B1-1-1;M1_B1-1-2	SNV:C>A	intergenic_variant
Prunus mume	MHG1	Pm1	8571110	M1_R10-2;M1_R11-1-1;M1_R11-1M;M1_R11-2-1;M1_R9-1Mb	SNV:G>A	missense_variant
Prunus mume	MHG1	Pm1	8598697	M1_R2-2;M1_R2M	SNV:T>A	intron_variant
Prunus mume	MHG1	Pm1	8820246	M1_B1-1-1	INS:A	intron_variant
Prunus mume	MHG1	Pm1	9113550	M1_R6-2-2-1	SNV:C>T	intergenic_variant
Prunus mume	MHG1	Pm1	9275245	M1_R7-1-1;M1_R7-1-2	SNV:A>T	intergenic_variant
Prunus mume	MHG1	Pm1	9494365	M1_B2-4-1;M1_B2-4-2	SNV:G>T	intergenic_variant
Prunus mume	MHG1	Pm1	10164983	M1_R4-2;M1_R7-1-2;M1_R8-1-2;M1_R8-2-2;M1_R8-2-3;M1_R8-2-4-1;M1_R8-2-4-2;M1_R8-2-4M;M1_R8-2Mb	SNV:C>T	intergenic_variant
Prunus mume	MHG1	Pm1	10910656	M1_R2-2;M1_R2M	SNV:C>A	intergenic_variant
Prunus mume	MHG1	Pm1	11988685	M1_B3-T1-1;M1_B3-T1-2	SNV:C>A	intergenic_variant
Prunus mume	MHG1	Pm1	12212850	M1_B3-1-2	INS:CT	intergenic_variant
Prunus mume	MHG1	Pm1	12681604	M1_R10-2;M1_R11-1-1;M1_R11-1M;M1_R11-2-1;M1_R9-1Mb	SNV:T>G	intergenic_variant
Prunus mume	MHG1	Pm1	12958025	M1_R6-2-2-1	SNV:G>A	intergenic_variant
Prunus mume	MHG1	Pm1	13105172	M1_B2-3-1;M1_B2-3-2	SNV:C>T	intergenic_variant
Prunus mume	MHG1	Pm1	13486543	M1_R1-1-1;M1_R1-1-2;M1_R1-1-3;M1_R1-1Ma;M1_R1-1Mb;M1_R1-1Mc;M1_R1-2-2-1;M1_R1-2-2-2;M1_R1-2-2-3;M1_R1-2-2Ma;M1_R1-2-2Mb;M1_R1-2M	SNV:A>G	intron_variant
Prunus mume	MHG1	Pm1	13905983	M1_B3-1-1-1;M1_B3-1-1-2;M1_B3-1-1-3;M1_B3-1-1-5;M1_B3-1-2	INS:TA	intergenic_variant
Prunus mume	MHG1	Pm1	14325077	M1_B2-5-1;M1_B2-5-2;M1_B2-5-3	SNV:C>T	intergenic_variant
Prunus mume	MHG1	Pm1	15316295	M1_R2-2;M1_R2M	SNV:G>T	intergenic_variant
Prunus mume	MHG1	Pm1	16111700	M1_R8-1-1;M1_R8-1-2	SNV:C>T	intergenic_variant
Prunus mume	MHG1	Pm1	16470282	M1_B1-1-1;M1_B1-1-2;M1_B1-2-1-1;M1_B1-2-1-2;M1_B1-2-2;M1_B1-2-T2-1;M1_B1-2-T2-2	SNV:C>T	intergenic_variant
Prunus mume	MHG1	Pm1	17399014	M1_R2-2;M1_R2M	SNV:G>A	intergenic_variant
Prunus mume	MHG1	Pm1	17709311	M1_R9-1Mb	SNV:G>C	intergenic_variant
Prunus mume	MHG1	Pm1	18454564	M1_R11-1-1;M1_R11-1M;M1_R11-2-1	DEL:CTTGACACGTGTTAGGTAGACCAAAT	intron_variant
Prunus mume	MHG1	Pm1	18634634	M1_R1-2-2-2;M1_R1-2-2-3;M1_R1-2-2Ma;M1_R1-2-2Mb;M1_R1-2M	SNV:C>T	intergenic_variant
Prunus mume	MHG1	Pm1	19173599	M1_R1-1-1;M1_R1-1-2;M1_R1-1-3;M1_R1-1Ma;M1_R1-1Mb;M1_R1-1Mc	SNV:T>C	intron_variant
Prunus mume	MHG1	Pm1	19858774	M1_R1-1-1;M1_R1-1-2;M1_R1-1-3;M1_R1-1Ma;M1_R1-1Mb;M1_R1-1Mc;M1_R1-2-2-1;M1_R1-2-2-2;M1_R1-2-2-3;M1_R1-2-2Ma;M1_R1-2-2Mb;M1_R1-2M	SNV:C>G	intergenic_variant
Prunus mume	MHG1	Pm1	20833100	M1_R7-1-1;M1_R7-1-2	SNV:G>A	intergenic_variant
Prunus mume	MHG1	Pm1	20956762	M1_R8-2-4-1	SNV:T>G	intergenic_variant
Prunus mume	MHG1	Pm1	21205191	M1_R8-2-4-1	SNV:G>A	intergenic_variant
Prunus mume	MHG1	Pm1	22174759	M1_R10-2	SNV:G>A	intergenic_variant
Prunus mume	MHG1	Pm1	22372285	M1_R1-2-2-1	SNV:G>A	intergenic_variant
Prunus mume	MHG1	Pm1	22763756	M1_R1-2-2-2;M1_R1-2-2-3;M1_R1-2-2Mb	SNV:T>A	intergenic_variant
Prunus mume	MHG1	Pm1	23354400	M1_R8-2-2	SNV:C>T	missense_variant
Prunus mume	MHG1	Pm1	24161787	M1_R1-2-2-1	SNV:G>A	intergenic_variant
Prunus mume	MHG1	Pm1	24390632	M1_B2-5-1;M1_B2-5-2;M1_B2-5-3	INS:TC	intron_variant
Prunus mume	MHG1	Pm1	25367567	M1_B3-1-2	SNV:A>G	intergenic_variant
Prunus mume	MHG1	Pm1	25708889	M1_B1-1-2	INS:A	intergenic_variant
Prunus mume	MHG1	Pm1	25717656	M1_R10-2	SNV:G>T	intergenic_variant
Prunus mume	MHG1	Pm1	26353937	M1_R10-2;M1_R11-1-1;M1_R11-1M;M1_R11-2-1;M1_R9-1Mb	SNV:T>A	missense_variant
Prunus mume	MHG1	Pm1	26503593	M1_B2-1;M1_B2-2;M1_B2-4-2;M1_B2-5-1;M1_B2-5-2;M1_B2-5-3	DEL:G	intergenic_variant
Prunus mume	MHG1	Pm1	26658909	M1_B1-2-1-1;M1_B1-2-1-2	SNV:G>T	intergenic_variant
Prunus mume	MHG1	Pm2	1194786	M1_R2-2;M1_R2M	SNV:A>T	intergenic_variant
Prunus mume	MHG1	Pm2	1500222	M1_R1-1-1;M1_R1-1-2;M1_R1-1-3;M1_R1-1Ma;M1_R1-1Mb;M1_R1-1Mc;M1_R1-2-2-1;M1_R1-2-2-3;M1_R1-2-2Ma;M1_R1-2-2Mb;M1_R1-2M	SNV:A>T	intergenic_variant
Prunus mume	MHG1	Pm2	1764399	M1_R10-2;M1_R11-1-1;M1_R11-1M;M1_R11-2-1;M1_R9-1Mb	SNV:C>G	missense_variant
Prunus mume	MHG1	Pm2	1854633	M1_R10-2	SNV:C>T	synonymous_variant
Prunus mume	MHG1	Pm2	1868823	M1_R4-2	SNV:G>T	missense_variant
Prunus mume	MHG1	Pm2	2279058	M1_R1-2-2-3	SNV:G>A	intergenic_variant
Prunus mume	MHG1	Pm2	2416356	M1_B3-2;M1_B3-T1-1;M1_B3-T1-2	SNV:C>T	missense_variant
Prunus mume	MHG1	Pm2	3349642	M1_B1-1-1;M1_B1-1-2	DEL:TATTTATTTATT	intergenic_variant
Prunus mume	MHG1	Pm2	3623485	M1_B3-1-1-1;M1_B3-1-1-3;M1_B3-1-1-5;M1_B3-1-2;M1_B3-2;M1_B3-T1-1;M1_B3-T1-2	INS:TA	intergenic_variant
Prunus mume	MHG1	Pm2	4118877	M1_B2-4-1;M1_B2-4-2	SNV:C>T	intergenic_variant
Prunus mume	MHG1	Pm2	4642504	M1_R9-1Mb	DEL:TA	intergenic_variant
Prunus mume	MHG1	Pm2	4874023	M1_R8-2-4-1;M1_R8-2-4M;M1_R8-2Mb	SNV:T>A	intron_variant
Prunus mume	MHG1	Pm2	4914064	M1_B2-3-2;M1_B2-4-1	INS:AT	intron_variant
Prunus mume	MHG1	Pm2	5157092	M1_R10-2;M1_R11-1-1;M1_R11-1M;M1_R11-2-1;M1_R9-1Mb	SNV:C>T	intergenic_variant
Prunus mume	MHG1	Pm2	5375858	M1_R11-2-1	SNV:C>A	intergenic_variant
Prunus mume	MHG1	Pm2	5819062	M1_R8-2-4-1	SNV:G>C	intron_variant
Prunus mume	MHG1	Pm2	6123729	M1_R8-2-4-1;M1_R8-2-4-2;M1_R8-2-4M	SNV:T>C	intron_variant
Prunus mume	MHG1	Pm2	6950370	M1_B1-1-1	SNV:T>G	intergenic_variant
Prunus mume	MHG1	Pm2	7092393	M1_B3-2	SNV:A>G	intergenic_variant
Prunus mume	MHG1	Pm2	7099418	M1_R1-2-2-3	SNV:C>G	intron_variant
Prunus mume	MHG1	Pm2	9072354	M1_R8-1-2;M1_R8-2-1;M1_R8-2-2;M1_R8-2-4-1;M1_R8-2-4-2;M1_R8-2-4M;M1_R8-2Mb	INS:A	intergenic_variant
Prunus mume	MHG1	Pm2	9148816	M1_R4-2	SNV:A>C	missense_variant
Prunus mume	MHG1	Pm2	9836467	M1_R1-2-2-2	SNV:C>A	missense_variant
Prunus mume	MHG1	Pm2	9991895	M1_B2-3-1;M1_B2-3-2	SNV:C>T	intron_variant
Prunus mume	MHG1	Pm2	10103078	M1_R1-1-1;M1_R1-1-3;M1_R1-1Mc	DEL:G	intron_variant
Prunus mume	MHG1	Pm2	10205713	M1_R11-1-1;M1_R11-1M	SNV:G>T	intergenic_variant
Prunus mume	MHG1	Pm2	10227118	M1_R8-2-4-2	DEL:A	intergenic_variant
Prunus mume	MHG1	Pm2	10399475	M1_R8-2-4-1	SNV:G>C	intergenic_variant
Prunus mume	MHG1	Pm2	10711232	M1_R2-2;M1_R2M;M1_R6-2-2-1	SNV:G>A	intergenic_variant
Prunus mume	MHG1	Pm2	11155179	M1_R1-1-1;M1_R1-1-2;M1_R1-1-3;M1_R1-1Ma;M1_R1-1Mb;M1_R1-1Mc;M1_R1-2-2-1;M1_R1-2-2-2;M1_R1-2-2-3;M1_R1-2-2Ma;M1_R1-2-2Mb;M1_R1-2M	SNV:G>C	synonymous_variant
Prunus mume	MHG1	Pm2	11322771	M1_R2-2;M1_R2M	SNV:G>A	intergenic_variant
Prunus mume	MHG1	Pm2	11847531	M1_R11-2-1	SNV:C>T	missense_variant
Prunus mume	MHG1	Pm2	13710154	M1_B1-2-T2-1;M1_B1-2-T2-2	SNV:A>C	intergenic_variant
Prunus mume	MHG1	Pm2	14082368	M1_R10-2	SNV:C>T	intergenic_variant
Prunus mume	MHG1	Pm2	14756828	M1_R10-2	INS:TACA	intron_variant
Prunus mume	MHG1	Pm2	15112282	M1_R1-2-2-3	SNV:C>T	missense_variant
Prunus mume	MHG1	Pm2	17359377	M1_B3-1-1-1;M1_B3-1-1-2;M1_B3-1-1-3;M1_B3-1-1-4;M1_B3-1-1-5	INS:AG	intergenic_variant
Prunus mume	MHG1	Pm2	17405798	M1_R4-2;M1_R7-1-1;M1_R7-1-2;M1_R8-1-1;M1_R8-1-2;M1_R8-2-1;M1_R8-2-2;M1_R8-2-3;M1_R8-2-4-1;M1_R8-2-4-2;M1_R8-2-4M;M1_R8-2Mb	SNV:A>G	intergenic_variant
Prunus mume	MHG1	Pm2	17999189	M1_B3-1-2	SNV:C>A	missense_variant
Prunus mume	MHG1	Pm2	18028057	M1_R1-1-1;M1_R1-1-2;M1_R1-1-3;M1_R1-1Ma;M1_R1-1Mb;M1_R1-1Mc	SNV:G>C	intergenic_variant
Prunus mume	MHG1	Pm2	19121114	M1_R7-1-1;M1_R7-1-2	SNV:C>T	intergenic_variant
Prunus mume	MHG1	Pm2	19711020	M1_R1-1-1;M1_R1-1-3;M1_R1-1Ma;M1_R1-1Mb;M1_R1-1Mc	SNV:A>G	synonymous_variant
Prunus mume	MHG1	Pm2	21567590	M1_B2-3-1;M1_B2-3-2	INS:CT	intergenic_variant
Prunus mume	MHG1	Pm2	23957522	M1_B2-5-1	SNV:T>C	intergenic_variant
Prunus mume	MHG1	Pm2	24331505	M1_R4-2	SNV:C>T	intergenic_variant
Prunus mume	MHG1	Pm2	24532285	M1_B2-1;M1_B2-2;M1_B2-3-1;M1_B2-3-2;M1_B2-4-1;M1_B2-4-2;M1_B2-5-1;M1_B2-5-2;M1_B2-5-3	SNV:A>T	intron_variant
Prunus mume	MHG1	Pm2	26443092	M1_R4-2	SNV:A>G	intergenic_variant
Prunus mume	MHG1	Pm2	26549803	M1_B3-1-2	SNV:G>A	intergenic_variant
Prunus mume	MHG1	Pm2	26645099	M1_B1-2-T2-2	DEL:A	intergenic_variant
Prunus mume	MHG1	Pm2	28174008	M1_B2-1	SNV:G>T	intergenic_variant
Prunus mume	MHG1	Pm2	28312700	M1_R7-1-1	SNV:A>G	intergenic_variant
Prunus mume	MHG1	Pm2	28823719	M1_B2-4-1;M1_B2-4-2	SNV:C>T	missense_variant
Prunus mume	MHG1	Pm2	28878180	M1_R9-1Mb	DEL:AAGAATT	intergenic_variant
Prunus mume	MHG1	Pm2	29538607	M1_R7-1-1;M1_R7-1-2	SNV:C>G	intron_variant
Prunus mume	MHG1	Pm2	29627314	M1_R2-2;M1_R2M	INS:AGAGAGAG	intergenic_variant
Prunus mume	MHG1	Pm2	29904746	M1_B2-1;M1_B2-2;M1_B2-3-2;M1_B2-5-3	SNV:G>C	intergenic_variant
Prunus mume	MHG1	Pm2	29926696	M1_B1-2-T2-2	SNV:G>T	intergenic_variant
Prunus mume	MHG1	Pm2	30927174	M1_B1-2-1-1;M1_B1-2-1-2	SNV:T>A	intergenic_variant
Prunus mume	MHG1	Pm2	31142556	M1_R1-2-2-3	SNV:A>G	intergenic_variant
Prunus mume	MHG1	Pm2	31945895	M1_R11-1-1;M1_R11-1M;M1_R11-2-1	INS:CCATAC	intergenic_variant
Prunus mume	MHG1	Pm2	32505737	M1_R10-2;M1_R11-1-1;M1_R11-1M;M1_R11-2-1;M1_R9-1Mb	SNV:C>T	intergenic_variant
Prunus mume	MHG1	Pm2	32622290	M1_R1-2-2-3;M1_R1-2-2Mb	INS:ATG	intergenic_variant
Prunus mume	MHG1	Pm2	32675281	M1_B2-2	SNV:T>C	missense_variant
Prunus mume	MHG1	Pm2	32767950	M1_R1-1-1;M1_R1-1-2;M1_R1-1-3;M1_R1-1Ma;M1_R1-1Mb;M1_R1-1Mc;M1_R1-2-2-1;M1_R1-2-2-2;M1_R1-2-2-3;M1_R1-2-2Ma;M1_R1-2-2Mb;M1_R1-2M	SNV:A>G	intergenic_variant
Prunus mume	MHG1	Pm2	33118281	M1_B2-5-1;M1_B2-5-2;M1_B2-5-3	INS:AC	intergenic_variant
Prunus mume	MHG1	Pm2	33795719	M1_B1-2-T2-1	SNV:T>G	intergenic_variant
Prunus mume	MHG1	Pm2	34186510	M1_B2-5-1;M1_B2-5-2;M1_B2-5-3	INS:AG	intergenic_variant
Prunus mume	MHG1	Pm2	34849321	M1_R10-2	SNV:G>A	intergenic_variant
Prunus mume	MHG1	Pm2	34898802	M1_B2-1;M1_B2-2;M1_B2-3-1;M1_B2-3-2;M1_B2-4-1;M1_B2-4-2;M1_B2-5-1;M1_B2-5-2;M1_B2-5-3	INS:AT	intergenic_variant
Prunus mume	MHG1	Pm2	36055538	M1_R10-2	SNV:A>T	intergenic_variant
Prunus mume	MHG1	Pm2	37339449	M1_R9-1Mb	SNV:C>T	intergenic_variant
Prunus mume	MHG1	Pm2	38344791	M1_R1-2-2-1;M1_R1-2-2-2;M1_R1-2-2-3;M1_R1-2-2Ma;M1_R1-2-2Mb;M1_R1-2M	SNV:C>T	intergenic_variant
Prunus mume	MHG1	Pm2	39946275	M1_B2-2	SNV:G>T	missense_variant
Prunus mume	MHG1	Pm2	40066411	M1_R1-1-1;M1_R1-1-2;M1_R1-1-3;M1_R1-1Ma;M1_R1-1Mb;M1_R1-1Mc;M1_R1-2-2-1;M1_R1-2-2-2;M1_R1-2-2-3;M1_R1-2-2Ma;M1_R1-2-2Mb;M1_R1-2M	SNV:C>T	intergenic_variant
Prunus mume	MHG1	Pm2	40095950	M1_R11-1-1;M1_R11-1M	SNV:C>T	missense_variant
Prunus mume	MHG1	Pm2	40122889	M1_R4-2	INS:TA	intergenic_variant
Prunus mume	MHG1	Pm2	40232170	M1_R1-2-2-1	SNV:A>C	intergenic_variant
Prunus mume	MHG1	Pm2	40474895	M1_R1-1-1;M1_R1-1-2;M1_R1-1-3;M1_R1-1Ma;M1_R1-1Mb;M1_R1-1Mc;M1_R1-2-2-1;M1_R1-2-2-2;M1_R1-2-2-3;M1_R1-2-2Ma;M1_R1-2-2Mb;M1_R1-2M;M1_R10-2;M1_R11-1-1;M1_R11-1M;M1_R11-2-1;M1_R9-1Mb	SNV:G>A	intergenic_variant
Prunus mume	MHG1	Pm2	40557225	M1_R1-2-2-3	SNV:A>T	intergenic_variant
Prunus mume	MHG1	Pm2	42065768	M1_R1-2-2-1;M1_R1-2-2-2;M1_R1-2-2-3;M1_R1-2-2Ma;M1_R1-2-2Mb;M1_R1-2M	SNV:G>A	intergenic_variant
Prunus mume	MHG1	Pm3	772204	M1_R11-1-1;M1_R11-1M;M1_R11-2-1	SNV:G>C	intergenic_variant
Prunus mume	MHG1	Pm3	868922	M1_R2M	SNV:A>G	intergenic_variant
Prunus mume	MHG1	Pm3	1702237	M1_R10-2;M1_R11-1-1;M1_R11-1M;M1_R11-2-1;M1_R9-1Mb	SNV:T>G	intron_variant
Prunus mume	MHG1	Pm3	1878024	M1_R4-2	SNV:C>A	intergenic_variant
Prunus mume	MHG1	Pm3	2025838	M1_R4-2	SNV:C>G	intergenic_variant
Prunus mume	MHG1	Pm3	2240846	M1_B2-4-1	INS:AT	intergenic_variant
Prunus mume	MHG1	Pm3	2543356	M1_B2-1	SNV:A>G	intergenic_variant
Prunus mume	MHG1	Pm3	2559588	M1_B2-4-1;M1_B2-4-2	INS:AG	intergenic_variant
Prunus mume	MHG1	Pm3	3071551	M1_R7-1-1;M1_R7-1-2	SNV:C>T	missense_variant
Prunus mume	MHG1	Pm3	4190336	M1_R1-2-2-2;M1_R1-2-2-3;M1_R1-2-2Mb	SNV:G>C	intron_variant
Prunus mume	MHG1	Pm3	5198663	M1_B1-1-1;M1_B1-2-1-1;M1_B1-2-2;M1_B1-2-T2-1;M1_B1-2-T2-2	SNV:G>A	intergenic_variant
Prunus mume	MHG1	Pm3	5385018	M1_R11-2-1	SNV:G>T	intergenic_variant
Prunus mume	MHG1	Pm3	6534247	M1_R8-1-2;M1_R8-2-1;M1_R8-2-2;M1_R8-2-3;M1_R8-2-4-1;M1_R8-2-4-2;M1_R8-2-4M;M1_R8-2Mb	SNV:C>T	intergenic_variant
Prunus mume	MHG1	Pm3	7257598	M1_R9-1Mb	RPL:TTCCATTTTTTTAAAGAGAAATATTGATTCTTTCTTTTAATTGGGTTTGGGCTTACAAATAGCGAACCAACTACATGGCCTTGTAAACAAAATCGTTGGATCGAACTAACTAACGACTGACCAATCTGATTCAATAATCAAAACATAGATTCTTATTTAAGGGCCTTAATAAC>TAACTAACTAAC	intron_variant
Prunus mume	MHG1	Pm3	7635467	M1_R1-1-1;M1_R1-1-3;M1_R1-1Ma;M1_R1-1Mb;M1_R1-1Mc	SNV:A>T	intergenic_variant
Prunus mume	MHG1	Pm3	7954888	M1_R1-2-2-2;M1_R1-2-2-3;M1_R1-2-2Mb	DEL:TA	intergenic_variant
Prunus mume	MHG1	Pm3	8373363	M1_R1-2-2Mb	SNV:G>A	intergenic_variant
Prunus mume	MHG1	Pm3	8735105	M1_B1-2-2	SNV:G>A	intergenic_variant
Prunus mume	MHG1	Pm3	8953584	M1_R10-2;M1_R11-1-1;M1_R9-1Mb	SNV:G>A	intergenic_variant
Prunus mume	MHG1	Pm3	9690585	M1_R6-2-2-1	SNV:G>T	intergenic_variant
Prunus mume	MHG1	Pm3	10407160	M1_B3-T1-1	SNV:G>A	missense_variant
Prunus mume	MHG1	Pm3	13237331	M1_R10-2	SNV:C>T	intergenic_variant
Prunus mume	MHG1	Pm3	13670402	M1_B1-1-1;M1_B1-1-2;M1_B1-2-1-1;M1_B1-2-1-2;M1_B1-2-2;M1_B1-2-T2-1;M1_B1-2-T2-2	SNV:G>A	intergenic_variant
Prunus mume	MHG1	Pm3	13836995	M1_B1-1-2	SNV:T>C	intergenic_variant
Prunus mume	MHG1	Pm3	13917006	M1_R9-1Mb	DEL:CC	intergenic_variant
Prunus mume	MHG1	Pm3	15715087	M1_R1-1-1;M1_R1-1-2;M1_R1-1-3;M1_R1-1Ma;M1_R1-1Mb;M1_R1-1Mc	SNV:A>T	intergenic_variant
Prunus mume	MHG1	Pm3	16358899	M1_R1-1-1;M1_R1-1-2;M1_R1-1-3;M1_R1-1Ma;M1_R1-1Mb;M1_R1-1Mc	SNV:T>A	intron_variant
Prunus mume	MHG1	Pm3	16669977	M1_R10-2	SNV:G>A	missense_variant
Prunus mume	MHG1	Pm3	18346301	M1_R11-1-1;M1_R11-1M	DEL:GAGAGAGAGAGAGAGAGG	intron_variant
Prunus mume	MHG1	Pm3	19083649	M1_R1-1-1;M1_R1-1-2;M1_R1-1-3;M1_R1-1Ma;M1_R1-1Mb;M1_R1-1Mc;M1_R1-2-2-1;M1_R1-2-2-2;M1_R1-2-2-3;M1_R1-2-2Ma;M1_R1-2-2Mb;M1_R1-2M	SNV:T>G	intergenic_variant
Prunus mume	MHG1	Pm3	19374295	M1_R1-2-2-1	SNV:G>A	intergenic_variant
Prunus mume	MHG1	Pm3	19842047	M1_R4-2	SNV:G>T	intron_variant
Prunus mume	MHG1	Pm3	20408145	M1_R6-2-2-1	SNV:G>A	intron_variant
Prunus mume	MHG1	Pm3	20520899	M1_R1-2-2-1;M1_R1-2-2Ma;M1_R1-2M	INS:T	intron_variant
Prunus mume	MHG1	Pm3	20646842	M1_R8-2-4-1;M1_R8-2-4-2;M1_R8-2-4M	SNV:C>G	intron_variant
Prunus mume	MHG1	Pm3	20961107	M1_R11-1-1;M1_R11-2-1;M1_R11-1M	SNV:T>C	intron_variant
Prunus mume	MHG1	Pm3	21163959	M1_R11-2-1	SNV:T>A	intergenic_variant
Prunus mume	MHG1	Pm3	21391769	M1_R11-1-1;M1_R11-1M;M1_R11-2-1	SNV:C>T	intergenic_variant
Prunus mume	MHG1	Pm3	22061765	M1_R11-2-1	SNV:G>T	intergenic_variant
Prunus mume	MHG1	Pm3	22132474	M1_R1-2-2-3	SNV:G>A	intron_variant
Prunus mume	MHG1	Pm3	22353556	M1_R7-1-1;M1_R7-1-2	SNV:G>T	intergenic_variant
Prunus mume	MHG1	Pm3	23051982	M1_R6-2-2-1	SNV:G>C	missense_variant
Prunus mume	MHG1	Pm3	24162691	M1_R2-2;M1_R2M	DEL:T	intron_variant
Prunus mume	MHG1	Pm4	519318	M1_R4-2	SNV:G>A	intergenic_variant
Prunus mume	MHG1	Pm4	2651754	M1_B2-1	SNV:A>G	intergenic_variant
Prunus mume	MHG1	Pm4	2719041	M1_R2-2;M1_R2M;M1_R4-2;M1_R6-2-2-1;M1_R7-1-1;M1_R7-1-2;M1_R8-1-1;M1_R8-1-2;M1_R8-2-1;M1_R8-2-2;M1_R8-2-3;M1_R8-2-4-1;M1_R8-2-4-2;M1_R8-2-4M;M1_R8-2Mb	SNV:C>A	intron_variant
Prunus mume	MHG1	Pm4	2789761	M1_R9-1Mb	SNV:C>A	intergenic_variant
Prunus mume	MHG1	Pm4	3645504	M1_R2-2	SNV:C>T	intergenic_variant
Prunus mume	MHG1	Pm4	4001186	M1_R11-1-1;M1_R11-1M	SNV:T>G	intergenic_variant
Prunus mume	MHG1	Pm4	4667339	M1_R1-1Mb	SNV:A>G	intergenic_variant
Prunus mume	MHG1	Pm4	5149870	M1_B2-2	SNV:C>T	intergenic_variant
Prunus mume	MHG1	Pm4	5499868	M1_R1-1-1;M1_R1-1-2;M1_R1-1-3;M1_R1-1Ma;M1_R1-1Mb;M1_R1-1Mc;M1_R1-2-2-1;M1_R1-2-2-2;M1_R1-2-2-3;M1_R1-2-2Ma;M1_R1-2-2Mb;M1_R1-2M	SNV:C>G	intergenic_variant
Prunus mume	MHG1	Pm4	5774418	M1_B1-2-1-1;M1_B1-2-1-2	INS:TC	intergenic_variant
Prunus mume	MHG1	Pm4	5806384	M1_B3-1-1-1;M1_B3-1-1-2;M1_B3-1-1-3;M1_B3-1-1-4;M1_B3-1-1-5	SNV:T>C	intron_variant
Prunus mume	MHG1	Pm4	5841841	M1_R10-2	SNV:G>A	intron_variant
Prunus mume	MHG1	Pm4	6366331	M1_R10-2	SNV:G>A	missense_variant
Prunus mume	MHG1	Pm4	6422486	M1_R7-1-1;M1_R7-1-2	SNV:A>G	intergenic_variant
Prunus mume	MHG1	Pm4	6738154	M1_B1-2-2	SNV:G>A	intergenic_variant
Prunus mume	MHG1	Pm4	7080244	M1_B2-1;M1_B2-3-1;M1_B2-3-2;M1_B2-4-1;M1_B2-4-2;M1_B2-5-1;M1_B2-5-2;M1_B2-5-3	DEL:A	intergenic_variant
Prunus mume	MHG1	Pm4	8166577	M1_B1-2-1-1;M1_B1-2-1-2	SNV:G>T	intergenic_variant
Prunus mume	MHG1	Pm4	8176960	M1_B2-4-1;M1_B2-4-2	SNV:C>T	intergenic_variant
Prunus mume	MHG1	Pm4	8845397	M1_R9-1Mb	SNV:C>T	intergenic_variant
Prunus mume	MHG1	Pm4	9616014	M1_B2-3-1;M1_B2-3-2	INS:A	intergenic_variant
Prunus mume	MHG1	Pm4	9798613	M1_B2-1;M1_B2-3-1;M1_B2-3-2;M1_B2-4-1;M1_B2-4-2;M1_B2-5-1;M1_B2-5-2;M1_B2-5-3	SNV:T>A	intergenic_variant
Prunus mume	MHG1	Pm4	11151755	M1_B3-1-1-2;M1_B3-1-1-3;M1_B3-1-1-4;M1_B3-1-1-5;M1_B3-1-2;M1_B3-2;M1_B3-T1-1;M1_B3-T1-2	INS:A	intron_variant
Prunus mume	MHG1	Pm4	12190539	M1_R9-1Mb	SNV:C>T	intergenic_variant
Prunus mume	MHG1	Pm4	12490714	M1_B3-2	SNV:C>T	intergenic_variant
Prunus mume	MHG1	Pm4	12970944	M1_B1-1-2	SNV:G>A	intergenic_variant
Prunus mume	MHG1	Pm4	13095936	M1_R6-2-2-1	SNV:C>T	intergenic_variant
Prunus mume	MHG1	Pm4	13698357	M1_R1-1-1;M1_R1-1-2;M1_R1-1-3;M1_R1-1Ma;M1_R1-1Mb;M1_R1-1Mc	SNV:G>A	intergenic_variant
Prunus mume	MHG1	Pm4	14073609	M1_R1-2-2-1;M1_R1-2-2Ma;M1_R1-2M	SNV:C>A	intergenic_variant
Prunus mume	MHG1	Pm4	14132651	M1_R1-1-1;M1_R1-1-2;M1_R1-1-3;M1_R1-1Ma;M1_R1-1Mb;M1_R1-1Mc;M1_R1-2-2-1;M1_R1-2-2-2;M1_R1-2-2-3;M1_R1-2-2Ma;M1_R1-2-2Mb;M1_R1-2M	SNV:C>T	intergenic_variant
Prunus mume	MHG1	Pm4	14961075	M1_R1-2-2-2;M1_R1-2-2-3;M1_R1-2-2Mb	SNV:T>A	intergenic_variant
Prunus mume	MHG1	Pm4	15025459	M1_R1-2-2-3	SNV:A>C	intergenic_variant
Prunus mume	MHG1	Pm4	15631525	M1_R2-2;M1_R2M	SNV:T>C	intron_variant
Prunus mume	MHG1	Pm4	15682198	M1_R11-1-1	SNV:C>T	intron_variant
Prunus mume	MHG1	Pm4	16965372	M1_R1-1-1;M1_R1-1-2;M1_R1-1-3;M1_R1-1Ma;M1_R1-1Mb;M1_R1-1Mc;M1_R1-2-2-1;M1_R1-2-2-2;M1_R1-2-2-3;M1_R1-2-2Ma;M1_R1-2-2Mb;M1_R1-2M	SNV:A>G	intergenic_variant
Prunus mume	MHG1	Pm4	17151567	M1_B3-1-1-1;M1_B3-1-1-2;M1_B3-1-1-3;M1_B3-1-1-4;M1_B3-1-1-5	SNV:G>A	intergenic_variant
Prunus mume	MHG1	Pm4	17556231	M1_B1-2-2	SNV:C>T	synonymous_variant
Prunus mume	MHG1	Pm4	17681376	M1_R10-2	SNV:T>A	intron_variant
Prunus mume	MHG1	Pm4	17945694	M1_B1-2-1-1;M1_B1-2-1-2	SNV:C>T	intergenic_variant
Prunus mume	MHG1	Pm4	21617303	M1_R1-1-1;M1_R1-1-3;M1_R1-1Ma;M1_R1-2-2-2;M1_R1-2-2Ma;M1_R1-2-2Mb;M1_R1-2M	SNV:A>T	intron_variant
Prunus mume	MHG1	Pm4	21642986	M1_R8-1-2;M1_R8-2-1;M1_R8-2-2;M1_R8-2-3;M1_R8-2-4-1;M1_R8-2-4-2;M1_R8-2-4M;M1_R8-2Mb	SNV:A>T	intron_variant
Prunus mume	MHG1	Pm4	21943989	M1_B2-5-1;M1_B2-5-2;M1_B2-5-3	INS:CTT	intergenic_variant
Prunus mume	MHG1	Pm4	22750465	M1_B3-1-1-1;M1_B3-1-1-2;M1_B3-1-1-3;M1_B3-1-1-4;M1_B3-1-1-5	INS:GA	intergenic_variant
Prunus mume	MHG1	Pm4	22794703	M1_B1-2-T2-1;M1_B1-2-T2-2	SNV:C>T	missense_variant
Prunus mume	MHG1	Pm4	23290151	M1_B1-1-1	SNV:G>C	intergenic_variant
Prunus mume	MHG1	Pm5	559379	M1_R11-2-1	SNV:C>G	intergenic_variant
Prunus mume	MHG1	Pm5	1569051	M1_R2-2;M1_R2M	DEL:ACCCTAGGGCGGGAAGAGGGTTCGGCAGATGGTTCTCCACG	frameshift_variant
Prunus mume	MHG1	Pm5	2075091	M1_B1-2-1-1;M1_B1-2-1-2	SNV:T>A	intergenic_variant
Prunus mume	MHG1	Pm5	2711765	M1_R2-2;M1_R2M	DEL:TGTGTGTGTG	intergenic_variant
Prunus mume	MHG1	Pm5	4026604	M1_R8-1-2	SNV:C>T	intergenic_variant
Prunus mume	MHG1	Pm5	5093924	M1_R8-1-1;M1_R8-1-2	SNV:G>A	missense_variant
Prunus mume	MHG1	Pm5	5576536	M1_B2-3-1;M1_B2-3-2;M1_B2-4-1;M1_B2-4-2;M1_B2-5-1;M1_B2-5-2;M1_B2-5-3	INS:AT	intergenic_variant
Prunus mume	MHG1	Pm5	5791561	M1_B2-3-2	DEL:T	intergenic_variant
Prunus mume	MHG1	Pm5	5820424	M1_R1-2-2-3	SNV:G>A	intergenic_variant
Prunus mume	MHG1	Pm5	5972939	M1_R11-1-1	SNV:T>A	intergenic_variant
Prunus mume	MHG1	Pm5	6496020	M1_B1-2-1-1;M1_B1-2-1-2	SNV:T>A	intergenic_variant
Prunus mume	MHG1	Pm5	6958179	M1_B3-1-1-1;M1_B3-1-1-2;M1_B3-1-1-3;M1_B3-1-1-4;M1_B3-1-1-5	INS:GA	intergenic_variant
Prunus mume	MHG1	Pm5	7375803	M1_B1-1-2	SNV:C>T	intergenic_variant
Prunus mume	MHG1	Pm5	7418810	M1_R4-2	SNV:A>T	intergenic_variant
Prunus mume	MHG1	Pm5	8371905	M1_R10-2	SNV:T>C	synonymous_variant
Prunus mume	MHG1	Pm5	8713944	M1_R2-2;M1_R2M;M1_R6-2-2-1	SNV:A>G	intergenic_variant
Prunus mume	MHG1	Pm5	9004738	M1_R2-2;M1_R2M;M1_R6-2-2-1	SNV:G>A	intergenic_variant
Prunus mume	MHG1	Pm5	9055970	M1_B3-1-1-2;M1_B3-1-1-3;M1_B3-1-1-4;M1_B3-1-1-5	INS:AA	intergenic_variant
Prunus mume	MHG1	Pm5	9372210	M1_R4-2	SNV:A>C	intergenic_variant
Prunus mume	MHG1	Pm5	9477920	M1_R6-2-2-1	DEL:TAAATCTAAA	intergenic_variant
Prunus mume	MHG1	Pm5	9826378	M1_B2-4-2	SNV:C>T	intergenic_variant
Prunus mume	MHG1	Pm5	10015801	M1_R10-2	SNV:G>A	intergenic_variant
Prunus mume	MHG1	Pm5	13014907	M1_R1-2-2-3	SNV:C>T	missense_variant
Prunus mume	MHG1	Pm5	14071922	M1_B1-1-2	SNV:G>A	intergenic_variant
Prunus mume	MHG1	Pm5	14154951	M1_R2-2;M1_R2M;M1_R6-2-2-1	SNV:A>T	intergenic_variant
Prunus mume	MHG1	Pm5	14643261	M1_R8-2-4-1;M1_R8-2-4-2;M1_R8-2-4M	INS:ATGC	intergenic_variant
Prunus mume	MHG1	Pm5	14801984	M1_R11-1-1;M1_R11-1M	SNV:T>G	intergenic_variant
Prunus mume	MHG1	Pm5	16107248	M1_B2-4-1;M1_B2-4-2	INS:GA	intron_variant
Prunus mume	MHG1	Pm5	16176683	M1_B3-1-2	INS:A	intergenic_variant
Prunus mume	MHG1	Pm5	16246538	M1_B1-2-2	SNV:T>G	intron_variant
Prunus mume	MHG1	Pm5	16343180	M1_B2-4-1;M1_B2-4-2	SNV:C>T	intergenic_variant
Prunus mume	MHG1	Pm5	16344281	M1_R2-2;M1_R2M	SNV:A>C	intergenic_variant
Prunus mume	MHG1	Pm5	17460357	M1_R4-2	DEL:GAGAAGT	intergenic_variant
Prunus mume	MHG1	Pm5	17729916	M1_R11-1-1;M1_R11-1M;M1_R11-2-1	SNV:C>T	intergenic_variant
Prunus mume	MHG1	Pm5	19005047	M1_B1-2-T2-1	SNV:A>G	intergenic_variant
Prunus mume	MHG1	Pm5	19783484	M1_R2M	SNV:C>T	intergenic_variant
Prunus mume	MHG1	Pm5	20667935	M1_R1-1-1;M1_R1-1-2;M1_R1-1-3;M1_R1-1Ma;M1_R1-1Mb;M1_R1-1Mc;M1_R1-2-2-1;M1_R1-2-2-2;M1_R1-2-2-3;M1_R1-2-2Ma;M1_R1-2-2Mb;M1_R1-2M	SNV:C>T	intergenic_variant
Prunus mume	MHG1	Pm5	20866582	M1_R1-2-2-1	SNV:C>G	intergenic_variant
Prunus mume	MHG1	Pm5	21178164	M1_R2-2;M1_R2M	INS:TCTCTC	intergenic_variant
Prunus mume	MHG1	Pm5	21222688	M1_R10-2	SNV:C>T	missense_variant
Prunus mume	MHG1	Pm5	21689888	M1_R8-1-1	SNV:A>G	intergenic_variant
Prunus mume	MHG1	Pm5	22391164	M1_B3-1-1-1;M1_B3-1-1-2;M1_B3-1-1-3;M1_B3-1-1-4;M1_B3-1-1-5	SNV:T>C	intergenic_variant
Prunus mume	MHG1	Pm5	22978302	M1_R2M;M1_R6-2-2-1	SNV:C>T	intergenic_variant
Prunus mume	MHG1	Pm5	23159345	M1_R8-2-4-2	DEL:AGACAAAAAGACCAATTA	intergenic_variant
Prunus mume	MHG1	Pm5	23219556	M1_R10-2	SNV:C>T	intergenic_variant
Prunus mume	MHG1	Pm5	23608440	M1_R1-2-2-2;M1_R1-2-2Mb	SNV:T>C	intergenic_variant
Prunus mume	MHG1	Pm5	23693592	M1_R2-2;M1_R2M	SNV:C>T	synonymous_variant
Prunus mume	MHG1	Pm5	25119757	M1_R1-2M	SNV:C>T	intergenic_variant
Prunus mume	MHG1	Pm5	25522696	M1_R9-1Mb	SNV:C>A	intergenic_variant
Prunus mume	MHG1	Pm5	25890107	M1_B1-2-1-1	SNV:T>G	intergenic_variant
Prunus mume	MHG1	Pm6	20237	M1_R1-1-1;M1_R1-1-2;M1_R1-1-3;M1_R1-1Ma;M1_R1-1Mb;M1_R1-2-2Ma;M1_R1-2M	SNV:A>T	intron_variant
Prunus mume	MHG1	Pm6	172621	M1_B2-2	DEL:A	intron_variant
Prunus mume	MHG1	Pm6	1626375	M1_R10-2	DEL:TCCATAC	intergenic_variant
Prunus mume	MHG1	Pm6	1825924	M1_R1-2-2-1	SNV:C>T	intergenic_variant
Prunus mume	MHG1	Pm6	2076602	M1_B3-1-2	SNV:C>T	intergenic_variant
Prunus mume	MHG1	Pm6	2244518	M1_B3-1-1-1;M1_B3-1-1-2;M1_B3-1-1-3;M1_B3-1-1-4;M1_B3-1-1-5;M1_B3-1-2	SNV:C>A	intergenic_variant
Prunus mume	MHG1	Pm6	2391100	M1_B1-2-1-1;M1_B1-2-1-2	DEL:T	intergenic_variant
Prunus mume	MHG1	Pm6	2608143	M1_B2-5-1;M1_B2-5-2;M1_B2-5-3	SNV:T>C	missense_variant
Prunus mume	MHG1	Pm6	3459340	M1_R1-1-1;M1_R1-1-2;M1_R1-1-3;M1_R1-1Ma;M1_R1-1Mb;M1_R1-1Mc;M1_R1-2-2-1;M1_R1-2-2-2;M1_R1-2-2-3;M1_R1-2-2Ma;M1_R1-2-2Mb;M1_R1-2M	SNV:C>T	intergenic_variant
Prunus mume	MHG1	Pm6	3487495	M1_R2-2;M1_R2M;M1_R6-2-2-1	SNV:C>G	stop_gained
Prunus mume	MHG1	Pm6	3940455	M1_R2-2;M1_R2M;M1_R6-2-2-1	SNV:T>G	intergenic_variant
Prunus mume	MHG1	Pm6	4743840	M1_R2-2	SNV:G>A	intergenic_variant
Prunus mume	MHG1	Pm6	5848776	M1_R1-1-1;M1_R1-1-3;M1_R1-1Ma;M1_R1-1Mb;M1_R1-1Mc	SNV:G>T	intergenic_variant
Prunus mume	MHG1	Pm6	5938140	M1_R11-2-1	SNV:C>A	intergenic_variant
Prunus mume	MHG1	Pm6	7288547	M1_R1-2-2-3	MNV:TC>AA	intergenic_variant
Prunus mume	MHG1	Pm6	7296006	M1_R2-2;M1_R2M;M1_R6-2-2-1	SNV:C>T	intergenic_variant
Prunus mume	MHG1	Pm6	7719588	M1_B1-1-1	SNV:G>A	intergenic_variant
Prunus mume	MHG1	Pm6	8534389	M1_R8-1-2;M1_R8-2-4-1;M1_R8-2-4-2;M1_R8-2-4M;M1_R8-2Mb	DEL:GAGA	intergenic_variant
Prunus mume	MHG1	Pm6	8681635	M1_R7-1-1	SNV:A>T	intergenic_variant
Prunus mume	MHG1	Pm6	9902218	M1_R2-2;M1_R2M	INS:TCTC	intergenic_variant
Prunus mume	MHG1	Pm6	9927476	M1_R1-1-1;M1_R1-1-2;M1_R1-1-3;M1_R1-1Ma;M1_R1-1Mb;M1_R1-1Mc	SNV:C>T	intergenic_variant
Prunus mume	MHG1	Pm6	10242853	M1_R8-1-2;M1_R8-2-2;M1_R8-2-4-1;M1_R8-2-4M;M1_R8-2Mb	INS:AAT	intergenic_variant
Prunus mume	MHG1	Pm6	10653976	M1_R8-2-1;M1_R8-2-2;M1_R8-2-4-2;M1_R8-2Mb	DEL:T	intergenic_variant
Prunus mume	MHG1	Pm6	10786767	M1_R6-2-2-1	SNV:G>A	synonymous_variant
Prunus mume	MHG1	Pm6	10798210	M1_R1-2-2-3	SNV:C>T	intergenic_variant
Prunus mume	MHG1	Pm6	10997611	M1_R10-2	SNV:C>T	synonymous_variant
Prunus mume	MHG1	Pm6	11891393	M1_B1-1-2	SNV:G>A	intergenic_variant
Prunus mume	MHG1	Pm6	13559507	M1_R1-1-1;M1_R1-1-2;M1_R1-1-3;M1_R1-1Ma;M1_R1-1Mb;M1_R1-1Mc;M1_R1-2-2-1;M1_R1-2-2-2;M1_R1-2-2-3;M1_R1-2-2Ma;M1_R1-2-2Mb;M1_R1-2M	INS:TG	intergenic_variant
Prunus mume	MHG1	Pm6	13622129	M1_B2-1;M1_B2-3-1;M1_B2-4-2;M1_B2-5-2	SNV:G>A	intergenic_variant
Prunus mume	MHG1	Pm6	14418475	M1_R2-2;M1_R2M;M1_R6-2-2-1	SNV:G>A	missense_variant
Prunus mume	MHG1	Pm6	14850375	M1_R10-2	SNV:A>G	intergenic_variant
Prunus mume	MHG1	Pm6	16006023	M1_R10-2;M1_R11-1-1;M1_R11-1M;M1_R11-2-1;M1_R9-1Mb	INS:TTG	intergenic_variant
Prunus mume	MHG1	Pm6	16212369	M1_R10-2	RPL:AGCTGCAACTCAAACAATGGCCTT>TCAAGCTGCTCATAAGCTGTAGTAAGACGTCAGCTACTGCTCATAAGCTACTG	intergenic_variant
Prunus mume	MHG1	Pm6	16736772	M1_R1-2-2-2;M1_R1-2-2-3;M1_R1-2-2Mb	SNV:A>T	intergenic_variant
Prunus mume	MHG1	Pm6	16840570	M1_B2-1;M1_B2-2;M1_B2-3-1;M1_B2-3-2;M1_B2-4-1;M1_B2-4-2;M1_B2-5-1;M1_B2-5-2;M1_B2-5-3	SNV:A>T	intergenic_variant
Prunus mume	MHG1	Pm6	17639867	M1_R6-2-2-1	SNV:G>A	intergenic_variant
Prunus mume	MHG1	Pm6	19043120	M1_R11-2-1	SNV:T>C	intron_variant
Prunus mume	MHG1	Pm6	19418997	M1_R10-2	SNV:C>T	intergenic_variant
Prunus mume	MHG1	Pm6	19433651	M1_R1-2-2-2;M1_R1-2-2-3;M1_R1-2-2Mb	DEL:T	intergenic_variant
Prunus mume	MHG1	Pm6	19484043	M1_R1-2-2-1;M1_R1-2-2Ma;M1_R1-2M	SNV:T>G	intron_variant
Prunus mume	MHG1	Pm6	19641433	M1_R10-2	SNV:A>G	intergenic_variant
Prunus mume	MHG1	Pm7	150388	M1_B3-2	SNV:T>C	intergenic_variant
Prunus mume	MHG1	Pm7	1246765	M1_R7-1-1;M1_R7-1-2	SNV:G>A	intergenic_variant
Prunus mume	MHG1	Pm7	1793430	M1_R8-2-4-1;M1_R8-2-4-2;M1_R8-2-4M	SNV:G>A	intergenic_variant
Prunus mume	MHG1	Pm7	1865578	M1_R8-2-1	SNV:T>A	intergenic_variant
Prunus mume	MHG1	Pm7	2253271	M1_R2M	DEL:ATACAAAT	intergenic_variant
Prunus mume	MHG1	Pm7	3722112	M1_R1-2-2-3	SNV:C>T	intergenic_variant
Prunus mume	MHG1	Pm7	4105140	M1_R1-1-1;M1_R1-1-2;M1_R1-1-3;M1_R1-1Ma;M1_R1-1Mb;M1_R1-1Mc;M1_R1-2-2-1;M1_R1-2-2-2;M1_R1-2-2-3;M1_R1-2-2Ma;M1_R1-2-2Mb;M1_R1-2M	DEL:G	intergenic_variant
Prunus mume	MHG1	Pm7	4756696	M1_B1-1-1	SNV:A>G	intergenic_variant
Prunus mume	MHG1	Pm7	5843439	M1_R11-1-1	INS:T	intergenic_variant
Prunus mume	MHG1	Pm7	6221071	M1_R10-2;M1_R11-1-1;M1_R11-1M;M1_R11-2-1;M1_R9-1Mb	SNV:G>A	intergenic_variant
Prunus mume	MHG1	Pm7	6314740	M1_R10-2;M1_R11-1-1;M1_R11-1M;M1_R11-2-1;M1_R9-1Mb	SNV:C>T	intergenic_variant
Prunus mume	MHG1	Pm7	6724557	M1_R1-1-1;M1_R1-1-3;M1_R1-1Mb;M1_R1-1Mc	DEL:G	intron_variant
Prunus mume	MHG1	Pm7	6776529	M1_R11-1-1;M1_R11-1M;M1_R11-2-1;M1_R9-1Mb	SNV:T>A	intergenic_variant
Prunus mume	MHG1	Pm7	7302178	M1_R1-2-2-2	SNV:C>T	missense_variant
Prunus mume	MHG1	Pm7	7750878	M1_R7-1-1;M1_R7-1-2	SNV:C>T	intergenic_variant
Prunus mume	MHG1	Pm7	7883021	M1_B2-1;M1_B2-2;M1_B2-3-1;M1_B2-3-2;M1_B2-4-1;M1_B2-4-2;M1_B2-5-1;M1_B2-5-2;M1_B2-5-3	SNV:G>A	intergenic_variant
Prunus mume	MHG1	Pm7	8696652	M1_R1-2-2-2;M1_R1-2-2-3;M1_R1-2-2Mb	SNV:C>G	intron_variant
Prunus mume	MHG1	Pm7	9076624	M1_R1-1-1;M1_R1-1-2;M1_R1-1-3;M1_R1-1Ma;M1_R1-1Mb;M1_R1-1Mc;M1_R1-2-2-1;M1_R1-2-2-2;M1_R1-2-2-3;M1_R1-2-2Ma;M1_R1-2-2Mb;M1_R1-2M	SNV:T>G	missense_variant
Prunus mume	MHG1	Pm7	9102273	M1_R7-1-1;M1_R7-1-2	DEL:GAATA	intergenic_variant
Prunus mume	MHG1	Pm7	9294281	M1_B1-2-1-1;M1_B1-2-1-2;M1_B1-2-2;M1_B1-2-T2-1;M1_B1-2-T2-2	SNV:C>T	intergenic_variant
Prunus mume	MHG1	Pm7	9786835	M1_R2-2;M1_R2M;M1_R6-2-2-1	SNV:T>A	intergenic_variant
Prunus mume	MHG1	Pm7	11242031	M1_R6-2-2-1	SNV:C>G	intergenic_variant
Prunus mume	MHG1	Pm7	11610933	M1_B1-1-1	INS:TC	intergenic_variant
Prunus mume	MHG1	Pm7	13688606	M1_B3-1-1-1;M1_B3-1-1-2;M1_B3-1-1-4;M1_B3-1-1-5	SNV:T>A	intergenic_variant
Prunus mume	MHG1	Pm7	14999706	M1_R1-1-1;M1_R1-1-3;M1_R1-1Mb	SNV:C>T	intergenic_variant
Prunus mume	MHG1	Pm7	15020394	M1_R1-1-1;M1_R1-1-2;M1_R1-1-3;M1_R1-1Ma;M1_R1-1Mb;M1_R1-1Mc;M1_R1-2-2-1;M1_R1-2-2-2;M1_R1-2-2-3;M1_R1-2-2Ma;M1_R1-2-2Mb;M1_R1-2M	SNV:T>C	intergenic_variant
Prunus mume	MHG1	Pm7	15300621	M1_B2-1	SNV:G>T	missense_variant
Prunus mume	MHG1	Pm7	16368562	M1_R10-2	SNV:T>C	intron_variant
Prunus mume	MHG1	Pm8	12742	M1_R1-2-2-3	SNV:G>A	intergenic_variant
Prunus mume	MHG1	Pm8	216972	M1_R11-1-1;M1_R11-1M;M1_R9-1Mb	SNV:G>A	intergenic_variant
Prunus mume	MHG1	Pm8	2249909	M1_R10-2	SNV:G>A	intergenic_variant
Prunus mume	MHG1	Pm8	2359341	M1_R1-1-1;M1_R1-1-2;M1_R1-1-3;M1_R1-1Ma;M1_R1-1Mb;M1_R1-1Mc;M1_R1-2-2-1;M1_R1-2-2-2;M1_R1-2-2-3;M1_R1-2-2Ma;M1_R1-2-2Mb;M1_R1-2M	SNV:T>C	intergenic_variant
Prunus mume	MHG1	Pm8	2548793	M1_B1-2-1-1;M1_B1-2-1-2	SNV:A>G	intergenic_variant
Prunus mume	MHG1	Pm8	3108495	M1_B2-4-2	DEL:AT	intergenic_variant
Prunus mume	MHG1	Pm8	4670778	M1_R1-1-1;M1_R1-1-2;M1_R1-1-3;M1_R1-1Ma;M1_R1-1Mb;M1_R1-1Mc	SNV:G>A	intergenic_variant
Prunus mume	MHG1	Pm8	4812880	M1_B3-1-2	DEL:GAGAGAGAGA	intergenic_variant
Prunus mume	MHG1	Pm8	5056111	M1_R8-2-4-1;M1_R8-2-4-2;M1_R8-2-4M	SNV:T>G	missense_variant
Prunus mume	MHG1	Pm8	6288562	M1_R1-1-1;M1_R1-1-2;M1_R1-1-3;M1_R1-1Ma;M1_R1-1Mb;M1_R1-1Mc;M1_R1-2-2-1;M1_R1-2-2-2;M1_R1-2-2-3;M1_R1-2-2Ma;M1_R1-2-2Mb;M1_R1-2M	SNV:G>A	intergenic_variant
Prunus mume	MHG1	Pm8	7073729	M1_B1-1-2	SNV:G>A	intergenic_variant
Prunus mume	MHG1	Pm8	7243112	M1_B1-1-2	INS:AT	intergenic_variant
Prunus mume	MHG1	Pm8	7409011	M1_R1-1-1;M1_R1-1-2;M1_R1-1-3;M1_R1-1Ma;M1_R1-1Mb;M1_R1-1Mc;M1_R1-2-2-1;M1_R1-2-2-2;M1_R1-2-2-3;M1_R1-2-2Ma;M1_R1-2-2Mb;M1_R1-2M	SNV:T>C	intergenic_variant
Prunus mume	MHG1	Pm8	10201509	M1_B2-2	INS:AG	intron_variant
Prunus mume	MHG1	Pm8	10536684	M1_R9-1Mb	SNV:G>T	intergenic_variant
Prunus mume	MHG1	Pm8	10601294	M1_R1-2-2-1	SNV:C>T	intergenic_variant
Prunus mume	MHG1	Pm8	10696780	M1_B2-4-1;M1_B2-4-2	SNV:C>T	intergenic_variant
Prunus mume	MHG1	Pm8	11208950	M1_B2-5-1;M1_B2-5-2;M1_B2-5-3	DEL:A	intergenic_variant
Prunus mume	MHG1	Pm8	11996527	M1_B2-3-1;M1_B2-3-2	SNV:C>T	intergenic_variant
Prunus mume	MHG1	Pm8	12606958	M1_R7-1-1;M1_R7-1-2	SNV:C>T	intergenic_variant
Prunus mume	MHG1	Pm8	12875003	M1_R2M	SNV:A>T	intron_variant
Prunus mume	MHG1	Pm8	13157786	M1_R11-1-1;M1_R11-1M	SNV:C>T	intergenic_variant
Prunus mume	MHG1	Pm8	13171821	M1_B1-1-1;M1_B1-1-2;M1_B1-2-1-1;M1_B1-2-1-2;M1_B1-2-2;M1_B1-2-T2-1;M1_B1-2-T2-2	SNV:G>T	intergenic_variant
Prunus mume	MHG1	Pm8	13486544	M1_R1-1-2;M1_R1-1-3;M1_R1-1Ma;M1_R1-1Mb;M1_R1-1Mc	SNV:G>A	intergenic_variant
Prunus mume	MHG1	Pm8	14864236	M1_R1-1-1;M1_R1-1-2;M1_R1-1-3;M1_R1-1Ma;M1_R1-1Mb;M1_R1-1Mc;M1_R1-2-2-1;M1_R1-2-2-2;M1_R1-2-2-3;M1_R1-2-2Ma;M1_R1-2-2Mb;M1_R1-2M	SNV:A>C	intergenic_variant
Prunus mume	MHG1	Pm8	15459736	M1_R7-1-1	SNV:C>T	intergenic_variant
Prunus mume	MHG1	Pm8	16907145	M1_R2-2;M1_R2M	INS:GA	intron_variant
Prunus mume	MHG1	Pm8	16909859	M1_B3-1-2	SNV:C>T	intron_variant
Prunus mume	MHG1	Pm8	16949055	M1_R1-2-2-1	SNV:G>A	intergenic_variant
Prunus mume	MHG1	Pm8	17180561	M1_R7-1-1;M1_R7-1-2	SNV:G>T	intergenic_variant
Prunus mume	MHG2	Pm1	590326	M2_B2-2-2-1;M2_B2-2-2-2;M2_B2-2-2-3-1;M2_B2-2-2-3-2;M2_B2-2-2-3-3-1;M2_B2-2-2-3-3-2;M2_B2-2-2-3-3-3;M2_B2-2-2-3-3-4;M2_B2-2-2-3-3-5;M2_B2-2-T1	SNV:G>A	synonymous_variant
Prunus mume	MHG2	Pm1	2187704	M2_B1-1-2-2	SNV:T>A	intergenic_variant
Prunus mume	MHG2	Pm1	2348306	M2_B2-2-2-3-2	SNV:C>G	intergenic_variant
Prunus mume	MHG2	Pm1	8587897	M2_B1-2-1	SNV:G>A	intergenic_variant
Prunus mume	MHG2	Pm1	9731778	M2_B2-2-T1	SNV:A>G	intergenic_variant
Prunus mume	MHG2	Pm1	9953827	M2_B2-1-2-T1	SNV:T>A	intergenic_variant
Prunus mume	MHG2	Pm1	11738774	M2_B2-1-2-1	SNV:A>G	intergenic_variant
Prunus mume	MHG2	Pm1	13217720	M2_B1-2-2-1;M2_B1-2-2-2	SNV:C>T	intergenic_variant
Prunus mume	MHG2	Pm1	14079738	M2_B2-2-2-2	SNV:C>T	intergenic_variant
Prunus mume	MHG2	Pm1	15401991	M2_B2-2-1-2-1	SNV:G>A	missense_variant
Prunus mume	MHG2	Pm1	16114553	M2_B2-2-1-1-2	SNV:C>T	intergenic_variant
Prunus mume	MHG2	Pm1	17454315	M2_B1-2-1	SNV:C>A	intergenic_variant
Prunus mume	MHG2	Pm1	18787019	M2_B2-1-1-1	SNV:C>T	intergenic_variant
Prunus mume	MHG2	Pm1	21113632	M2_B2-2-2-3-2	SNV:C>A	intron_variant
Prunus mume	MHG2	Pm1	22254644	M2_B2-2-2-3-1	SNV:C>T	intron_variant
Prunus mume	MHG2	Pm1	22826035	M2_B2-2-1-2-2	SNV:G>A	intergenic_variant
Prunus mume	MHG2	Pm1	24502753	M2_B2-1-2-1	SNV:C>T	intergenic_variant
Prunus mume	MHG2	Pm1	24586636	M2_B2-2-1-2-2	INS:AG	intergenic_variant
Prunus mume	MHG2	Pm1	25745585	M2_B2-2-2-3-1	DEL:CTCTCTCTCT	intergenic_variant
Prunus mume	MHG2	Pm1	26650313	M2_B2-2-2-3-1;M2_B2-2-2-3-2;M2_B2-2-2-3-3-1;M2_B2-2-2-3-3-2;M2_B2-2-2-3-3-3;M2_B2-2-2-3-3-4;M2_B2-2-2-3-3-5	SNV:C>T	intergenic_variant
Prunus mume	MHG2	Pm2	1562448	M2_B2-2-1-2-1	SNV:A>G	intron_variant
Prunus mume	MHG2	Pm2	2217962	M2_B2-1-1-1	SNV:C>A	missense_variant
Prunus mume	MHG2	Pm2	4386803	M2_B2-2-1-1-1	SNV:G>A	intergenic_variant
Prunus mume	MHG2	Pm2	9515414	M2_B1-T1	SNV:T>C	intergenic_variant
Prunus mume	MHG2	Pm2	12767045	M2_B2-1-2-1;M2_B2-1-2-T1;M2_B2-1-2-T2;M2_B2-1-2-T3	SNV:C>T	intergenic_variant
Prunus mume	MHG2	Pm2	13943996	M2_B2-2-2-2	SNV:G>A	missense_variant
Prunus mume	MHG2	Pm2	18881017	M2_B2-2-2-1;M2_B2-2-2-3-1;M2_B2-2-2-3-3-1;M2_B2-2-2-3-3-3;M2_B2-2-2-3-3-5;M2_B2-2-T1	SNV:C>A	intergenic_variant
Prunus mume	MHG2	Pm2	19021549	M2_B2-1-1-1	SNV:A>T	missense_variant
Prunus mume	MHG2	Pm2	25499102	M2_B1-T1	SNV:C>T	intergenic_variant
Prunus mume	MHG2	Pm2	25826045	M2_B2-1-1-1	SNV:C>T	intergenic_variant
Prunus mume	MHG2	Pm2	25842092	M2_B2-2-1-1-1	SNV:G>C	intergenic_variant
Prunus mume	MHG2	Pm2	27649520	M2_B2-2-2-3-2	SNV:C>T	intergenic_variant
Prunus mume	MHG2	Pm2	28270670	M2_B2-2-2-2	SNV:A>G	intergenic_variant
Prunus mume	MHG2	Pm2	29531086	M2_B2-2-2-3-3-1;M2_B2-2-2-3-3-2;M2_B2-2-2-3-3-3;M2_B2-2-2-3-3-4;M2_B2-2-2-3-3-5	SNV:C>T	stop_gained
Prunus mume	MHG2	Pm2	30177639	M2_B2-2-2-3-1	DEL:AAAGATATGTGTT	intron_variant
Prunus mume	MHG2	Pm2	34091399	M2_B2-2-2-3-2	INS:TA	intergenic_variant
Prunus mume	MHG2	Pm2	36732245	M2_B1-1-1-4;M2_B1-1-1-1;M2_B1-1-1-2;M2_B1-1-1-3	MNV:CA>AT	intergenic_variant
Prunus mume	MHG2	Pm2	36851006	M2_B2-2-2-2	SNV:C>T	intergenic_variant
Prunus mume	MHG2	Pm2	38014724	M2_B2-2-2-3-1	SNV:C>G	missense_variant
Prunus mume	MHG2	Pm3	706569	M2_B1-2-1;M2_B1-2-2-1;M2_B1-2-2-2;M2_B1-2-2-T1;M2_B1-2-T1	SNV:G>T	intergenic_variant
Prunus mume	MHG2	Pm3	954087	M2_B1-2-T1	INS:T	intergenic_variant
Prunus mume	MHG2	Pm3	2048987	M2_B2-2-2-3-1	INS:TC	intergenic_variant
Prunus mume	MHG2	Pm3	6091871	M2_B2-2-1-2-1	SNV:G>A	intergenic_variant
Prunus mume	MHG2	Pm3	9496563	M2_B2-2-1-1-2	SNV:C>A	missense_variant
Prunus mume	MHG2	Pm3	9884559	M2_B2-2-2-1;M2_B2-2-2-2;M2_B2-2-2-3-1;M2_B2-2-2-3-2;M2_B2-2-2-3-3-2;M2_B2-2-2-3-3-4;M2_B2-2-2-3-3-5;M2_B2-2-T1	SNV:G>A	missense_variant
Prunus mume	MHG2	Pm3	11264023	M2_B2-2-2-3-1;M2_B2-2-2-3-2;M2_B2-2-2-3-3-2;M2_B2-2-2-3-3-3;M2_B2-2-2-3-3-4	SNV:A>T	intergenic_variant
Prunus mume	MHG2	Pm3	18101500	M2_B2-1-1-1	SNV:C>T	intergenic_variant
Prunus mume	MHG2	Pm3	18908570	M2_B2-1-1-2	SNV:C>T	intergenic_variant
Prunus mume	MHG2	Pm3	19104899	M2_B2-2-T1	DEL:ATTCCCCCTCCCTCCACAA	intergenic_variant
Prunus mume	MHG2	Pm3	22904504	M2_B1-2-1	DEL:AT	intergenic_variant
Prunus mume	MHG2	Pm3	23833251	M2_B2-1-2-T3	SNV:G>A	intergenic_variant
Prunus mume	MHG2	Pm4	3120588	M2_B2-2-1-3	SNV:C>T	synonymous_variant
Prunus mume	MHG2	Pm4	3647817	M2_B1-2-T1	INS:A	intergenic_variant
Prunus mume	MHG2	Pm4	9630374	M2_B1-1-2-1	SNV:G>A	intergenic_variant
Prunus mume	MHG2	Pm4	10457199	M2_B2-2-1-1-1	SNV:C>T	intergenic_variant
Prunus mume	MHG2	Pm4	10619258	M2_B2-2-2-2;M2_B2-2-2-3-1;M2_B2-2-2-3-2;M2_B2-2-2-3-3-1;M2_B2-2-2-3-3-2;M2_B2-2-2-3-3-3;M2_B2-2-2-3-3-4;M2_B2-2-2-3-3-5	SNV:C>T	intergenic_variant
Prunus mume	MHG2	Pm4	12999012	M2_B2-1-2-1	DEL:TCTCTCTCTC	intergenic_variant
Prunus mume	MHG2	Pm4	13164263	M2_B2-2-2-1	SNV:G>T	intergenic_variant
Prunus mume	MHG2	Pm4	13855889	M2_B2-2-2-3-1	SNV:C>A	intergenic_variant
Prunus mume	MHG2	Pm4	14161634	M2_B2-2-1-1-2	SNV:A>G	intergenic_variant
Prunus mume	MHG2	Pm4	15818231	M2_B2-2-1-2-1	SNV:G>A	intergenic_variant
Prunus mume	MHG2	Pm4	16048651	M2_B1-1-1-1;M2_B1-1-2-1;M2_B1-1-2-2;M2_B1-2-2-1;M2_B1-2-2-T1;M2_B1-2-T1;M2_B1-T1	SNV:C>T	intergenic_variant
Prunus mume	MHG2	Pm5	2880016	M2_B2-1-1-1;M2_B2-1-1-2	SNV:T>C	synonymous_variant
Prunus mume	MHG2	Pm5	6363975	M2_B1-2-2-2	SNV:G>T	intergenic_variant
Prunus mume	MHG2	Pm5	8054459	M2_B1-1-1-4;M2_B1-1-1-1;M2_B1-1-1-2;M2_B1-1-1-3	SNV:G>A	intergenic_variant
Prunus mume	MHG2	Pm5	10027751	M2_B2-2-1-3	SNV:C>T	intron_variant
Prunus mume	MHG2	Pm5	11698264	M2_B2-2-1-1-2	SNV:C>A	intergenic_variant
Prunus mume	MHG2	Pm5	20492472	M2_B2-1-1-2	SNV:G>A	missense_variant
Prunus mume	MHG2	Pm5	20684067	M2_B2-1-1-2;M2_B2-1-2-T3	INS:TC	intergenic_variant
Prunus mume	MHG2	Pm6	578380	M2_B2-1-1-2	SNV:C>T	intergenic_variant
Prunus mume	MHG2	Pm6	725622	M2_B2-2-1-2-1	SNV:C>A	intergenic_variant
Prunus mume	MHG2	Pm6	6708343	M2_B2-2-2-2	SNV:A>T	intron_variant
Prunus mume	MHG2	Pm6	8919704	M2_B2-2-2-3-3-1;M2_B2-2-2-3-3-2;M2_B2-2-2-3-3-3;M2_B2-2-2-3-3-4;M2_B2-2-2-3-3-5	SNV:A>T	intergenic_variant
Prunus mume	MHG2	Pm6	10305714	M2_B2-2-2-2	SNV:C>T	intergenic_variant
Prunus mume	MHG2	Pm6	11491147	M2_B2-2-1-2-2	SNV:G>A	intergenic_variant
Prunus mume	MHG2	Pm6	13033143	M2_B2-2-T1	SNV:T>C	intergenic_variant
Prunus mume	MHG2	Pm6	14982154	M2_B2-1-2-T3	SNV:C>T	intergenic_variant
Prunus mume	MHG2	Pm6	17259702	M2_B2-1-2-1	SNV:T>C	intergenic_variant
Prunus mume	MHG2	Pm6	18882075	M2_B2-2-1-2-1	SNV:C>G	missense_variant
Prunus mume	MHG2	Pm6	19898392	M2_B2-2-2-2	SNV:A>C	intergenic_variant
Prunus mume	MHG2	Pm7	3213003	M2_B1-2-2-1	SNV:C>T	intergenic_variant
Prunus mume	MHG2	Pm7	3579945	M2_B1-1-2-2	SNV:A>G	intergenic_variant
Prunus mume	MHG2	Pm7	3719052	M2_B2-2-1-1-1	SNV:C>T	intergenic_variant
Prunus mume	MHG2	Pm7	5288162	M2_B2-2-1-3	SNV:C>T	synonymous_variant
Prunus mume	MHG2	Pm7	6288884	M2_B2-2-1-1-2	INS:TC	intergenic_variant
Prunus mume	MHG2	Pm7	9884977	M2_B1-1-2-2	SNV:C>A	intergenic_variant
Prunus mume	MHG2	Pm7	10222757	M2_B2-2-2-3-1;M2_B2-2-2-3-3-1;M2_B2-2-2-3-3-2;M2_B2-2-2-3-3-3;M2_B2-2-2-3-3-4	SNV:C>T	intron_variant
Prunus mume	MHG2	Pm7	10546456	M2_B2-2-2-2	SNV:A>C	intron_variant
Prunus mume	MHG2	Pm7	15027561	M2_B1-T1	SNV:G>A	missense_variant
Prunus mume	MHG2	Pm7	15373220	M2_B1-2-1	SNV:T>A	intergenic_variant
Prunus mume	MHG2	Pm7	16529477	M2_B2-2-2-2	DEL:TTC	intergenic_variant
Prunus mume	MHG2	Pm8	636376	M2_B2-1-2-T3	SNV:G>T	intergenic_variant
Prunus mume	MHG2	Pm8	784174	M2_B2-2-2-3-2	INS:A	intron_variant
Prunus mume	MHG2	Pm8	4724468	M2_B2-2-2-3-1;M2_B2-2-2-3-3-2;M2_B2-2-2-3-3-3;M2_B2-2-2-3-3-5	SNV:A>G	intergenic_variant
Prunus mume	MHG2	Pm8	5410527	M2_B2-2-2-2;M2_B2-2-2-3-1;M2_B2-2-2-3-2;M2_B2-2-2-3-3-1;M2_B2-2-2-3-3-2;M2_B2-2-2-3-3-3;M2_B2-2-2-3-3-4;M2_B2-2-2-3-3-5	SNV:C>T	intergenic_variant
Prunus mume	MHG2	Pm8	6062621	M2_B2-2-2-3-2	SNV:G>T	intergenic_variant
Prunus mume	MHG2	Pm8	9718113	M2_B1-2-2-2	SNV:T>G	intergenic_variant
Prunus mume	MHG2	Pm8	12966757	M2_B1-2-1	SNV:T>A	intergenic_variant
Prunus mume	MHG2	Pm8	13675391	M2_B2-2-2-1	INS:GT	intron_variant
Prunus mume	MHG2	Pm8	15700126	M2_B2-1-1-1	SNV:G>A	intergenic_variant
Prunus mume	MHG2	Pm8	15704943	M2_B1-2-2-1;M2_B1-2-2-2;M2_B1-2-2-T1	SNV:G>A	intergenic_variant
Prunus mume	MHG2	Pm8	15911536	M2_B2-1-2-T3	SNV:G>A	intergenic_variant
Prunus mume	MHG2	Pm8	16067443	M2_B1-2-2-2	SNV:A>G	intron_variant
Prunus mume	MHG2	Pm8	16170220	M2_B1-2-2-1	SNV:T>G	synonymous_variant
Prunus persica	DHQ1	Pp01	2130859	DHQ1_B1-1-L1;DHQ1_B1-1-L2	SNV:A>C	intergenic_variant
Prunus persica	DHQ1	Pp01	6783849	DHQ1_B2-7-L2	SNV:G>A	intergenic_variant
Prunus persica	DHQ1	Pp01	8524245	DHQ1_B4-3-L1	SNV:C>T	intergenic_variant
Prunus persica	DHQ1	Pp01	30077950	DHQ1_B2-16-L2	SNV:G>A	intergenic_variant
Prunus persica	DHQ1	Pp01	44452776	DHQ1_B3-L1	SNV:C>T	intergenic_variant
Prunus persica	DHQ1	Pp01	46978952	DHQ1_B1-6-L1	SNV:G>A	stop_gained
Prunus persica	DHQ1	Pp01	47012878	DHQ1_B3-2-L1;DHQ1_B3-4-L1;DHQ1_B3-5-L1;DHQ1_B3-L1	SNV:C>A	3_prime_UTR_variant
Prunus persica	DHQ1	Pp02	7844562	DHQ1_B2-1-L1	INS:T	intergenic_variant
Prunus persica	DHQ1	Pp02	14420383	DHQ1_B3-2-L1	SNV:G>A	intergenic_variant
Prunus persica	DHQ1	Pp02	19558433	DHQ1_B1-14-L2	SNV:C>A	intergenic_variant
Prunus persica	DHQ1	Pp02	21772043	DHQ1_B4-1-1-L1;DHQ1_B4-1-2-L1;DHQ1_B4-1-3-L1;DHQ1_B4-1-4-L1;DHQ1_B4-1-L1	SNV:C>T	intergenic_variant
Prunus persica	DHQ1	Pp02	25103323	DHQ1_B3-3-L1	SNV:C>A	intergenic_variant
Prunus persica	DHQ1	Pp03	5050873	DHQ1_B1-8-L1	SNV:T>A	intron_variant
Prunus persica	DHQ1	Pp03	8025879	DHQ1_B1-8-L2	SNV:C>A	intergenic_variant
Prunus persica	DHQ1	Pp03	10284333	DHQ1_B2-4-L2	SNV:C>T	intergenic_variant
Prunus persica	DHQ1	Pp03	11442602	DHQ1_B2-1-L1;DHQ1_B2-1-L2;DHQ1_B2-10-L1;DHQ1_B2-10-L2;DHQ1_B2-11-L1;DHQ1_B2-11-L2;DHQ1_B2-12-L1;DHQ1_B2-12-L2;DHQ1_B2-13-L1;DHQ1_B2-13-L2;DHQ1_B2-14-L1;DHQ1_B2-14-L2;DHQ1_B2-15-L1;DHQ1_B2-15-L2;DHQ1_B2-16-L1;DHQ1_B2-16-L2;DHQ1_B2-2-L1;DHQ1_B2-2-L2;DHQ1_B2-3-L1;DHQ1_B2-3-L2;DHQ1_B2-4-L1;DHQ1_B2-4-L2;DHQ1_B2-5-L1;DHQ1_B2-5-L2;DHQ1_B2-6-L1;DHQ1_B2-6-L2;DHQ1_B2-7-L1;DHQ1_B2-7-L2;DHQ1_B2-8-L1;DHQ1_B2-…	SNV:G>A	intergenic_variant
Prunus persica	DHQ1	Pp03	13536179	DHQ1_B1-9-L2	SNV:T>C	intergenic_variant
Prunus persica	DHQ1	Pp03	14366542	DHQ1_B3-5-L1	SNV:G>A	intergenic_variant
Prunus persica	DHQ1	Pp03	16656255	DHQ1_B2-5-L2	SNV:G>A	intergenic_variant
Prunus persica	DHQ1	Pp03	23684554	DHQ1_B2-1-L1	SNV:T>C	intergenic_variant
Prunus persica	DHQ1	Pp03	26711442	DHQ1_B4-1-1-L1	SNV:G>A	intergenic_variant
Prunus persica	DHQ1	Pp04	59918	DHQ1_B1-1-L2;DHQ1_B1-11-L2;DHQ1_B1-15-L1;DHQ1_B1-5-L2;DHQ1_B1-6-L1;DHQ1_B1-6-L2;DHQ1_B1-8-L1;DHQ1_B1-8-L2	SNV:C>T	intergenic_variant
Prunus persica	DHQ1	Pp04	3301078	DHQ1_B1-12-L2	SNV:C>T	missense_variant
Prunus persica	DHQ1	Pp04	7551178	DHQ1_B3-1-L1;DHQ1_B3-5-L1	SNV:C>T	intergenic_variant
Prunus persica	DHQ1	Pp04	9295050	DHQ1_B3-2-L1;DHQ1_B3-4-L1;DHQ1_B3-5-L1;DHQ1_B3-L1	SNV:G>A	intergenic_variant
Prunus persica	DHQ1	Pp04	10594791	DHQ1_B2-15-L1;DHQ1_B2-15-L2	SNV:C>T	intron_variant
Prunus persica	DHQ1	Pp04	12171497	DHQ1_B2-11-L1;DHQ1_B2-11-L2	SNV:C>T	intergenic_variant
Prunus persica	DHQ1	Pp04	18451401	DHQ1_B1-9-L1	SNV:G>T	intergenic_variant
Prunus persica	DHQ1	Pp04	20301868	DHQ1_B2-2-L2	SNV:C>T	intergenic_variant
Prunus persica	DHQ1	Pp04	20537082	DHQ1_B1-1-L2	SNV:G>T	intergenic_variant
Prunus persica	DHQ1	Pp04	21561355	DHQ1_B1-1-L2;DHQ1_B1-10-L2;DHQ1_B1-11-L1;DHQ1_B1-12-L1;DHQ1_B1-14-L2;DHQ1_B1-15-L1;DHQ1_B1-16-L1;DHQ1_B1-4-L2;DHQ1_B1-5-L2;DHQ1_B1-6-L1;DHQ1_B1-7-L2;DHQ1_B1-8-L1;DHQ1_B1-9-L1;DHQ1_B1-L1	SNV:G>A	intergenic_variant
Prunus persica	DHQ1	Pp05	7701218	DHQ1_B2-1-L2	SNV:C>T	intergenic_variant
Prunus persica	DHQ1	Pp05	11214460	DHQ1_B1-10-L1;DHQ1_B1-10-L2;DHQ1_B1-11-L1;DHQ1_B1-11-L2;DHQ1_B1-12-L1;DHQ1_B1-12-L2;DHQ1_B1-13-L1;DHQ1_B1-13-L2;DHQ1_B1-14-L1;DHQ1_B1-14-L2;DHQ1_B1-15-L1;DHQ1_B1-16-L1;DHQ1_B1-3-L1;DHQ1_B1-3-L2;DHQ1_B1-4-L1;DHQ1_B1-4-L2;DHQ1_B1-5-L1;DHQ1_B1-5-L2;DHQ1_B1-6-L1;DHQ1_B1-6-L2;DHQ1_B1-7-L1;DHQ1_B1-7-L2;DHQ1_B1-8-L1;DHQ1_B1-8-L2;DHQ1_B1-9-L1;DHQ1_B1-9-L2;DHQ1_B1-L1	SNV:G>A	intergenic_variant
Prunus persica	DHQ1	Pp05	12795806	DHQ1_B4-2-L1	SNV:A>C	missense_variant
Prunus persica	DHQ1	Pp06	8855969	DHQ1_B2-7-L2	SNV:A>G	missense_variant
Prunus persica	DHQ1	Pp06	14823004	DHQ1_B4-2-L1	SNV:C>T	intergenic_variant
Prunus persica	DHQ1	Pp06	16466640	DHQ1_B2-10-L2	SNV:C>T	intergenic_variant
Prunus persica	DHQ1	Pp06	20057328	DHQ1_B2-16-L2	SNV:T>C	intergenic_variant
Prunus persica	DHQ1	Pp06	23762314	DHQ1_B3-1-L1;DHQ1_B3-3-L1;DHQ1_B3-4-L1;DHQ1_B3-5-L1	SNV:C>T	intergenic_variant
Prunus persica	DHQ1	Pp07	1251826	DHQ1_B2-11-L2;DHQ1_B2-16-L1;DHQ1_B2-2-L1;DHQ1_B2-2-L2	DEL:AGAGAGAGAGAG	intron_variant
Prunus persica	DHQ1	Pp07	2188653	DHQ1_B2-12-L1	SNV:G>A	intergenic_variant
Prunus persica	DHQ1	Pp07	3945141	DHQ1_B1-7-L2	SNV:C>T	intergenic_variant
Prunus persica	DHQ1	Pp07	4111193	DHQ1_B4-1-4-L1	SNV:G>A	intergenic_variant
Prunus persica	DHQ1	Pp07	6530476	DHQ1_B2-7-L2	SNV:C>G	intergenic_variant
Prunus persica	DHQ1	Pp07	10388108	DHQ1_B2-14-L2	SNV:A>G	intron_variant
Prunus persica	DHQ1	Pp07	17210817	DHQ1_B4-1-1-L1;DHQ1_B4-1-3-L1;DHQ1_B4-1-L1	SNV:A>T	intergenic_variant
Prunus persica	DHQ1	Pp08	1434014	DHQ1_B3-4-L1	SNV:G>A	intergenic_variant
Prunus persica	DHQ1	Pp08	14420846	DHQ1_B4-2-L1	SNV:G>A	intergenic_variant
Prunus persica	Maoping	Pp01	6525002	PM_3-4	SNV:G>A	intergenic_variant
Prunus persica	Maoping	Pp01	8735675	PM_2-1;PM_2-4	INS:AG	intergenic_variant
Prunus persica	Maoping	Pp01	19958822	PM_3-1	INS:C	intergenic_variant
Prunus persica	Maoping	Pp01	21587537	PM_T-2	SNV:G>A	intergenic_variant
Prunus persica	Maoping	Pp01	22379874	PM_2-1;PM_2-2;PM_2-3;PM_2-4;PM_2-5	SNV:C>T	intergenic_variant
Prunus persica	Maoping	Pp01	25084759	PM_3-2	SNV:T>A	intergenic_variant
Prunus persica	Maoping	Pp01	25390010	PM_1-1	DEL:TCTCTCTCTC	intergenic_variant
Prunus persica	Maoping	Pp01	26905835	PM_1-2	SNV:A>G	missense_variant
Prunus persica	Maoping	Pp01	29566240	PM_1-4	SNV:G>T	intergenic_variant
Prunus persica	Maoping	Pp01	29848358	PM_2-4	SNV:A>T	missense_variant
Prunus persica	Maoping	Pp01	34960398	PM_1-1;PM_1-2;PM_1-3	INS:TC	3_prime_UTR_variant
Prunus persica	Maoping	Pp01	41433329	PM_T-2	SNV:C>T	intergenic_variant
Prunus persica	Maoping	Pp01	43923232	PM_1-4	SNV:G>A	intergenic_variant
Prunus persica	Maoping	Pp01	44375519	PM_3-3	SNV:A>G	intergenic_variant
Prunus persica	Maoping	Pp02	10266678	PM_3-2	SNV:A>G	intergenic_variant
Prunus persica	Maoping	Pp02	11940889	PM_3-3	RPL:AGAGGAGGGTC>GGCTCATTCTCATGCATTCAGGCGCACGCGGCTAGCCCATAAAGCAATCCGCCAAGGAT	intergenic_variant
Prunus persica	Maoping	Pp02	13041203	PM_2-1;PM_2-2;PM_2-3;PM_2-4;PM_2-5	SNV:A>T	intergenic_variant
Prunus persica	Maoping	Pp02	15416851	PM_1-1	SNV:A>G	intergenic_variant
Prunus persica	Maoping	Pp02	17025306	PM_1-2	SNV:T>G	intron_variant
Prunus persica	Maoping	Pp03	2680180	PM_2-5	DEL:T	intergenic_variant
Prunus persica	Maoping	Pp03	11316743	PM_2-4	SNV:G>A	intergenic_variant
Prunus persica	Maoping	Pp03	20643629	PM_3-3	SNV:A>G	intergenic_variant
Prunus persica	Maoping	Pp03	23653526	PM_T-2	SNV:T>C	synonymous_variant
Prunus persica	Maoping	Pp04	80253	PM_1-1;PM_1-2;PM_1-3;PM_1-4;PM_1-5	SNV:C>G	intron_variant
Prunus persica	Maoping	Pp05	7515185	PM_T-2	SNV:C>A	intergenic_variant
Prunus persica	Maoping	Pp05	9389976	PM_2-4	SNV:C>T	3_prime_UTR_variant
Prunus persica	Maoping	Pp05	17855859	PM_2-1	DEL:GAGAGAGAGA	intergenic_variant
Prunus persica	Maoping	Pp06	22646957	PM_3-3	DEL:TTGTCGGGAAA	intergenic_variant
Prunus persica	Maoping	Pp06	25290819	PM_3-2	INS:AT	intergenic_variant
Prunus persica	Maoping	Pp06	26240605	PM_3-4	SNV:A>G	intergenic_variant
Prunus persica	Maoping	Pp06	30304903	PM_1-1	DEL:CGCTAGGCGGTCGCTAGGCGGCTAGGCGGT	intergenic_variant
Prunus persica	Maoping	Pp07	1877332	PM_T-1	SNV:C>A	intergenic_variant
Prunus persica	Maoping	Pp07	19484072	PM_2-2;PM_2-5	SNV:G>A	intergenic_variant
Prunus persica	Maoping	Pp08	3294620	PM_3-2	SNV:C>T	intergenic_variant
Prunus persica	Maoping	Pp08	6613773	PM_2-1	SNV:G>A	intergenic_variant
Prunus persica	Maoping	Pp08	8146280	PM_2-3	SNV:T>C	intergenic_variant
Prunus persica	Maoping	Pp08	8586297	PM_1-4	SNV:G>T	intergenic_variant
Prunus persica	Maoping	Pp08	11835343	PM_T-2	SNV:C>T	intergenic_variant
Prunus persica	Maoping	Pp08	17946660	PM_1-5	DEL:C	intergenic_variant
Prunus persica	Maoping	Pp08	18849001	PM_3-3	SNV:G>T	intergenic_variant
Prunus persica	Maoping	Pp08	21384798	PM_3-3	INS:TG	intergenic_variant
Prunus persica	NJAU1	Pp01	1993070	N1_B2-2-1-2-1	SNV:G>T	intergenic_variant
Prunus persica	NJAU1	Pp01	8303654	N1_B2-2-1-T3	SNV:C>T	synonymous_variant
Prunus persica	NJAU1	Pp01	9037427	N1_B2-1-1-T4	DEL:CTCTCTCTCTCTCTCTCTCTCTCA	intergenic_variant
Prunus persica	NJAU1	Pp01	12107011	N1_B2-2-1-2-3	SNV:G>T	intron_variant
Prunus persica	NJAU1	Pp01	13504000	N1_B1-1-1;N1_B1-2-1;N1_B1-3-T1;N1_B1-T1;N1_B1-T2-1;N1_B1-T4-1;N1_B1-T5-1	SNV:G>A	intergenic_variant
Prunus persica	NJAU1	Pp01	18430516	N1_B2-1-2-1	SNV:T>C	intergenic_variant
Prunus persica	NJAU1	Pp01	18852697	N1_B2-1-2-1;N1_B2-1-2-3;N1_B2-1-2-T1;N1_B2-1-2-T4	SNV:C>T	intergenic_variant
Prunus persica	NJAU1	Pp01	19081009	N1_B1-T5-1	SNV:G>A	intergenic_variant
Prunus persica	NJAU1	Pp01	19779794	N1_B2-2-3-T4	SNV:G>A	intergenic_variant
Prunus persica	NJAU1	Pp01	20929954	N1_B2-2-1-2-1	SNV:G>A	intergenic_variant
Prunus persica	NJAU1	Pp01	22092604	N1_B2-1-1-4	SNV:C>T	intergenic_variant
Prunus persica	NJAU1	Pp01	24212849	N1_B1-T5-1	INS:A	intergenic_variant
Prunus persica	NJAU1	Pp01	26279875	N1_B2-2-1-T2-1	SNV:G>A	intergenic_variant
Prunus persica	NJAU1	Pp01	26474004	N1_B2-1-2-3	SNV:G>A	intergenic_variant
Prunus persica	NJAU1	Pp01	26693337	N1_B2-2-1-3-T1	SNV:C>T	intron_variant
Prunus persica	NJAU1	Pp01	27184927	N1_B2-2-3-T4	SNV:G>A	intergenic_variant
Prunus persica	NJAU1	Pp01	27750188	N1_B2-1-2-1	DEL:CGAATCG	frameshift_variant
Prunus persica	NJAU1	Pp01	28790146	N1_B1-1-1	SNV:C>T	intron_variant
Prunus persica	NJAU1	Pp01	29607046	N1_B2-2-1-T3	SNV:C>T	intergenic_variant
Prunus persica	NJAU1	Pp01	30679635	N1_B1-T5-1	DEL:TGT	inframe_deletion
Prunus persica	NJAU1	Pp01	33488056	N1_B2-1-1-1;N1_B2-1-1-4	SNV:G>T	3_prime_UTR_variant
Prunus persica	NJAU1	Pp01	33659588	N1_B2-2-2-1-2-1	SNV:G>A	3_prime_UTR_variant
Prunus persica	NJAU1	Pp01	35957583	N1_B2-2-1-3-T1	SNV:G>T	stop_gained
Prunus persica	NJAU1	Pp01	35957586	N1_B2-2-1-3-T1	SNV:G>T	stop_gained
Prunus persica	NJAU1	Pp01	36786509	N1_B2-1-2-1;N1_B2-1-2-3;N1_B2-1-2-T4	SNV:G>C	intron_variant
Prunus persica	NJAU1	Pp01	39185660	N1_B1-1-1;N1_B1-2-1;N1_B1-3-T1;N1_B1-T1;N1_B1-T2-1;N1_B1-T4-1;N1_B1-T5-1	SNV:G>A	intergenic_variant
Prunus persica	NJAU1	Pp01	43452471	N1_B1-2-1	SNV:A>G	intron_variant
Prunus persica	NJAU1	Pp02	188513	N1_B2-1-1-1;N1_B2-1-1-4;N1_B2-1-1-T1;N1_B2-1-1-T4	SNV:G>A	intergenic_variant
Prunus persica	NJAU1	Pp02	890420	N1_B2-1-2-1	SNV:G>A	intergenic_variant
Prunus persica	NJAU1	Pp02	3671067	N1_B2-2-1-T3	SNV:A>G	intergenic_variant
Prunus persica	NJAU1	Pp02	4706344	N1_B2-1-1-1;N1_B2-1-1-4;N1_B2-1-1-T1;N1_B2-1-1-T4;N1_B2-1-2-1;N1_B2-1-2-3;N1_B2-1-2-T1;N1_B2-1-2-T4;N1_B2-2-1-1;N1_B2-2-1-2-1;N1_B2-2-1-2-3;N1_B2-2-1-3-T1;N1_B2-2-1-T2-1;N1_B2-2-1-T3;N1_B2-2-2-1-1-1;N1_B2-2-2-1-2-1;N1_B2-2-2-2;N1_B2-2-3-T1;N1_B2-2-3-T4	SNV:A>G	intron_variant
Prunus persica	NJAU1	Pp02	4987363	N1_B2-1-1-1	SNV:T>C	intergenic_variant
Prunus persica	NJAU1	Pp02	5887116	N1_B2-2-3-T1	SNV:T>A	intron_variant
Prunus persica	NJAU1	Pp02	8327000	N1_B2-2-1-2-3	INS:GA	intergenic_variant
Prunus persica	NJAU1	Pp02	9548362	N1_B2-2-2-1-1-1	SNV:G>T	intergenic_variant
Prunus persica	NJAU1	Pp02	9676069	N1_B2-1-2-T4	SNV:C>T	intergenic_variant
Prunus persica	NJAU1	Pp02	10275536	N1_B1-1-1	SNV:C>T	intergenic_variant
Prunus persica	NJAU1	Pp02	11116039	N1_B2-2-2-2	SNV:C>T	intergenic_variant
Prunus persica	NJAU1	Pp02	17521352	N1_B2-1-1-T4	DEL:A	intergenic_variant
Prunus persica	NJAU1	Pp02	20634093	N1_B2-2-1-2-1	SNV:G>A	intergenic_variant
Prunus persica	NJAU1	Pp02	21010191	N1_B1-1-1	SNV:C>T	intergenic_variant
Prunus persica	NJAU1	Pp02	22603002	N1_B2-1-1-T1	SNV:T>G	intergenic_variant
Prunus persica	NJAU1	Pp02	26717277	N1_B2-1-1-T4	SNV:G>T	intron_variant
Prunus persica	NJAU1	Pp03	385679	N1_B2-2-1-2-1	SNV:T>A	intergenic_variant
Prunus persica	NJAU1	Pp03	3792475	N1_B2-2-1-1;N1_B2-2-1-2-1;N1_B2-2-1-2-3;N1_B2-2-1-T2-1;N1_B2-2-1-T3	SNV:G>A	intergenic_variant
Prunus persica	NJAU1	Pp03	4257056	N1_B2-2-1-T2-1	SNV:C>A	intergenic_variant
Prunus persica	NJAU1	Pp03	5600175	N1_B1-2-1	INS:A	intergenic_variant
Prunus persica	NJAU1	Pp03	6543188	N1_B1-1-1	SNV:G>T	intergenic_variant
Prunus persica	NJAU1	Pp03	7510618	N1_B1-1-1	SNV:C>A	intergenic_variant
Prunus persica	NJAU1	Pp03	8414075	N1_B2-2-1-T2-1	SNV:G>A	intergenic_variant
Prunus persica	NJAU1	Pp03	9625745	N1_B2-2-1-2-3	SNV:G>A	5_prime_UTR_variant
Prunus persica	NJAU1	Pp03	10005939	N1_B2-2-3-T1	SNV:G>T	intergenic_variant
Prunus persica	NJAU1	Pp03	10475583	N1_B2-2-3-T1	SNV:T>G	intergenic_variant
Prunus persica	NJAU1	Pp03	10531698	N1_B2-1-2-1	SNV:G>C	intergenic_variant
Prunus persica	NJAU1	Pp03	13614191	N1_B2-1-1-T4	SNV:A>G	intergenic_variant
Prunus persica	NJAU1	Pp03	20266759	N1_B2-2-1-1	SNV:A>T	intergenic_variant
Prunus persica	NJAU1	Pp04	2046513	N1_B2-2-3-T4	SNV:C>T	intergenic_variant
Prunus persica	NJAU1	Pp04	2298263	N1_B2-2-1-2-3	INS:AG	intergenic_variant
Prunus persica	NJAU1	Pp04	4999214	N1_B2-2-2-1-2-1	SNV:G>A	intergenic_variant
Prunus persica	NJAU1	Pp04	7367322	N1_B2-2-1-2-1	INS:AGAG	intergenic_variant
Prunus persica	NJAU1	Pp04	15175550	N1_B2-2-2-1-1-1;N1_B2-2-2-1-2-1	INS:T	intergenic_variant
Prunus persica	NJAU1	Pp04	17114622	N1_B2-2-1-2-3	SNV:G>A	intergenic_variant
Prunus persica	NJAU1	Pp04	21909710	N1_B1-1-1	SNV:C>T	intron_variant
Prunus persica	NJAU1	Pp04	23923140	N1_B2-2-1-T2-1	SNV:G>A	intergenic_variant
Prunus persica	NJAU1	Pp05	1535991	N1_B2-1-2-1	SNV:A>G	intergenic_variant
Prunus persica	NJAU1	Pp05	3769722	N1_B2-2-1-T3	SNV:C>A	intergenic_variant
Prunus persica	NJAU1	Pp05	6504977	N1_B2-1-2-1	SNV:A>T	intergenic_variant
Prunus persica	NJAU1	Pp05	7227864	N1_B1-1-1;N1_B1-2-1;N1_B1-3-T1;N1_B1-T4-1;N1_B1-T5-1	SNV:G>A	intergenic_variant
Prunus persica	NJAU1	Pp05	12499230	N1_B2-2-2-2	SNV:C>A	intron_variant
Prunus persica	NJAU1	Pp05	13956730	N1_B1-2-1;N1_B1-3-T1;N1_B1-T5-1	SNV:T>C	intron_variant
Prunus persica	NJAU1	Pp05	17221401	N1_B2-2-1-T2-1	SNV:T>G	intron_variant
Prunus persica	NJAU1	Pp06	5965020	N1_B2-1-1-1	SNV:G>C	intergenic_variant
Prunus persica	NJAU1	Pp06	11612849	N1_B2-2-1-1	SNV:C>T	intron_variant
Prunus persica	NJAU1	Pp06	21446106	N1_B2-2-1-1;N1_B2-2-1-2-1;N1_B2-2-1-2-3;N1_B2-2-1-3-T1;N1_B2-2-1-T2-1;N1_B2-2-2-1-1-1;N1_B2-2-2-2;N1_B2-2-3-T1;N1_B2-2-3-T4	SNV:C>T	intergenic_variant
Prunus persica	NJAU1	Pp06	23083495	N1_B2-2-2-2	MNV:GC>TT	intron_variant
Prunus persica	NJAU1	Pp06	25491710	N1_B2-1-2-3	SNV:G>A	intergenic_variant
Prunus persica	NJAU1	Pp06	26678657	N1_B2-2-2-2	SNV:A>T	3_prime_UTR_variant
Prunus persica	NJAU1	Pp06	29966340	N1_B1-1-1;N1_B1-T1;N1_B1-T2-1;N1_B1-T4-1;N1_B1-T5-1	SNV:G>A	intergenic_variant
Prunus persica	NJAU1	Pp07	144379	N1_B2-2-3-T4	SNV:C>G	intergenic_variant
Prunus persica	NJAU1	Pp07	3017488	N1_B2-2-1-T2-1	SNV:C>T	intergenic_variant
Prunus persica	NJAU1	Pp07	6233219	N1_B1-2-1	SNV:G>T	intergenic_variant
Prunus persica	NJAU1	Pp07	10306415	N1_B2-1-2-3	INS:T	intergenic_variant
Prunus persica	NJAU1	Pp07	15286964	N1_B1-1-1;N1_B1-2-1;N1_B1-3-T1;N1_B1-T1;N1_B1-T2-1;N1_B1-T4-1;N1_B1-T5-1	SNV:G>A	5_prime_UTR_variant
Prunus persica	NJAU1	Pp07	15599624	N1_B2-2-1-2-1	SNV:A>T	intergenic_variant
Prunus persica	NJAU1	Pp08	986310	N1_B2-2-1-2-1	SNV:G>A	intron_variant
Prunus persica	NJAU1	Pp08	1892095	N1_B2-2-1-2-1;N1_B2-2-1-2-3;N1_B2-2-1-T3	SNV:C>T	intron_variant
Prunus persica	NJAU1	Pp08	1899902	N1_B2-2-1-3-T1	SNV:A>G	intergenic_variant
Prunus persica	NJAU1	Pp08	3202991	N1_B1-3-T1	SNV:G>A	intergenic_variant
Prunus persica	NJAU1	Pp08	3465257	N1_B2-1-1-T4	SNV:G>A	intergenic_variant
Prunus persica	NJAU1	Pp08	4106774	N1_B2-2-3-T1	SNV:G>A	intergenic_variant
Prunus persica	NJAU1	Pp08	4893861	N1_B1-T2-1	SNV:A>T	intergenic_variant
Prunus persica	NJAU1	Pp08	6205158	N1_B2-1-1-T1	SNV:C>T	intergenic_variant
Prunus persica	NJAU1	Pp08	8158990	N1_B1-T4-1	SNV:G>A	intergenic_variant
Prunus persica	NJAU1	Pp08	12046432	N1_B2-1-1-T4	SNV:G>T	intergenic_variant
Prunus persica	NJAU1	Pp08	16303710	N1_B2-2-3-T4	SNV:T>C	5_prime_UTR_variant
Prunus persica	NJAU1	Pp08	16468416	N1_B2-2-1-2-3	SNV:A>C	intron_variant
Prunus persica	NJAU1	Pp08	16741467	N1_B2-2-1-2-3	SNV:G>C	intergenic_variant
Prunus persica	NJAU1	Pp08	22418430	N1_B1-T5-1	DEL:AT	intron_variant
Prunus persica	NJAU2	Pp01	3525113	N2_B1-1;N2_B1-3	SNV:C>A	intron_variant
Prunus persica	NJAU2	Pp01	5125870	N2_B3-1	SNV:C>T	intergenic_variant
Prunus persica	NJAU2	Pp01	13715015	N2_B2-2	SNV:T>C	intergenic_variant
Prunus persica	NJAU2	Pp01	15274456	N2_B2-2	SNV:C>T	intergenic_variant
Prunus persica	NJAU2	Pp01	17679249	N2_B3-2	SNV:G>A	intergenic_variant
Prunus persica	NJAU2	Pp01	18366945	N2_B2-2	SNV:C>A	intergenic_variant
Prunus persica	NJAU2	Pp01	18934569	N2_B2-2	SNV:A>C	intron_variant
Prunus persica	NJAU2	Pp01	23131951	N2_B2-1	SNV:A>G	intergenic_variant
Prunus persica	NJAU2	Pp01	25174002	N2_B4-1	DEL:AT	intergenic_variant
Prunus persica	NJAU2	Pp01	26925655	N2_B4-1	SNV:C>T	intergenic_variant
Prunus persica	NJAU2	Pp01	30892372	N2_B4-1	SNV:G>C	intergenic_variant
Prunus persica	NJAU2	Pp01	37019664	N2_B3-1	SNV:G>A	3_prime_UTR_variant
Prunus persica	NJAU2	Pp01	46753951	N2_B3-1	SNV:A>T	intron_variant
Prunus persica	NJAU2	Pp02	20092040	N2_B4-1	INS:TC	5_prime_UTR_variant
Prunus persica	NJAU2	Pp02	23177111	N2_B1-3	SNV:C>T	intergenic_variant
Prunus persica	NJAU2	Pp02	26930592	N2_B3-1	SNV:A>G	missense_variant
Prunus persica	NJAU2	Pp02	29603294	N2_B4-1	SNV:A>T	5_prime_UTR_variant
Prunus persica	NJAU2	Pp03	3646441	N2_B1-1;N2_B1-3	SNV:C>T	intergenic_variant
Prunus persica	NJAU2	Pp03	5077836	N2_B2-1	SNV:C>T	intergenic_variant
Prunus persica	NJAU2	Pp03	9313068	N2_B2-2	SNV:A>G	intergenic_variant
Prunus persica	NJAU2	Pp03	15381957	N2_B3-2	INS:TC	intergenic_variant
Prunus persica	NJAU2	Pp03	17005733	N2_B2-2	SNV:C>T	3_prime_UTR_variant
Prunus persica	NJAU2	Pp03	17040581	N2_B4-2	SNV:C>T	intergenic_variant
Prunus persica	NJAU2	Pp04	4397446	N2_B3-1	MNV:GG>TT	intron_variant
Prunus persica	NJAU2	Pp04	20318824	N2_B4-2	SNV:C>T	missense_variant
Prunus persica	NJAU2	Pp05	6610283	N2_B2-1	SNV:G>A	intergenic_variant
Prunus persica	NJAU2	Pp05	7592090	N2_B2-1	SNV:C>A	intergenic_variant
Prunus persica	NJAU2	Pp05	10572068	N2_B3-1	SNV:G>A	intergenic_variant
Prunus persica	NJAU2	Pp06	1632629	N2_B4-2	SNV:G>A	intergenic_variant
Prunus persica	NJAU2	Pp06	4517463	N2_B2-2	SNV:G>T	intergenic_variant
Prunus persica	NJAU2	Pp06	16849709	N2_B3-1	SNV:A>G	3_prime_UTR_variant
Prunus persica	NJAU2	Pp06	17159033	N2_B4-2	SNV:C>T	intergenic_variant
Prunus persica	NJAU2	Pp06	17793650	N2_B3-1	SNV:T>A	intergenic_variant
Prunus persica	NJAU2	Pp06	19548878	N2_B3-2	SNV:G>A	intergenic_variant
Prunus persica	NJAU2	Pp06	20170176	N2_B4-2	SNV:T>G	intron_variant
Prunus persica	NJAU2	Pp06	23713986	N2_B2-2	SNV:G>C	intergenic_variant
Prunus persica	NJAU2	Pp06	23902060	N2_B2-2	SNV:C>T	intron_variant
Prunus persica	NJAU2	Pp07	2702201	N2_B1-1	SNV:A>G	intron_variant
Prunus persica	NJAU2	Pp07	4962290	N2_B1-3	SNV:A>T	intergenic_variant
Prunus persica	NJAU2	Pp07	9497922	N2_B1-1	SNV:T>A	intergenic_variant
Prunus persica	NJAU2	Pp07	9718205	N2_B3-1	SNV:G>A	intergenic_variant
Prunus persica	NJAU2	Pp07	12097794	N2_B4-2	SNV:G>A	intergenic_variant
Prunus persica	NJAU2	Pp07	15637992	N2_B3-1	SNV:G>A	5_prime_UTR_variant
Prunus persica	NJAU2	Pp08	4352783	N2_B3-2	SNV:G>A	intergenic_variant
Prunus persica	NJAU2	Pp08	10326055	N2_B3-2	SNV:G>A	intergenic_variant
Prunus persica	NJAU2	Pp08	20075704	N2_B4-2	SNV:G>A	intergenic_variant
Prunus persica	NJAU2	Pp08	20873648	N2_B4-1;N2_B4-2	SNV:C>T	intergenic_variant
Prunus persica	PXL	Pp01	331667	PXL_R1-2-1	DEL:A	intergenic_variant
Prunus persica	PXL	Pp01	789994	PXL_R2-1-1	DEL:TTAG	intron_variant
Prunus persica	PXL	Pp01	794608	PXL_B5-1-2	DEL:TATCAGACAG	intron_variant
Prunus persica	PXL	Pp01	2272925	PXL_R1-2M;PXL_R1-1;PXL_R1-2-1;PXL_R1-2-2;PXL_R1-2-3;PXL_R1-2-4;PXL_R1-2-5	SNV:G>A	intergenic_variant
Prunus persica	PXL	Pp01	2798182	PXL_R2-1-1	SNV:C>T	intergenic_variant
Prunus persica	PXL	Pp01	3665598	PXL_R2-1-1	SNV:C>T	intergenic_variant
Prunus persica	PXL	Pp01	5067725	PXL_B3-1L1;PXL_B3-2L1	SNV:C>T	intergenic_variant
Prunus persica	PXL	Pp01	5581428	PXL_R2-1-1	SNV:G>A	intron_variant
Prunus persica	PXL	Pp01	6022547	PXL_B1-1L1;PXL_B1-2L1	SNV:A>G	intergenic_variant
Prunus persica	PXL	Pp01	6563351	PXL_B1-1L1;PXL_B3-1L1;PXL_B4-2;PXL_B5-1-2;PXL_B6-1-1L1;PXL_B2-1-1;PXL_B2-1-3L1;PXL_B3-2L1;PXL_B4-3;PXL_B5-1-1;PXL_B6-1-2L1;PXL_B6-2-1L1;PXL_B6-3-2L1	SNV:C>T	intergenic_variant
Prunus persica	PXL	Pp01	8033897	PXL_B6-1-1L1	INS:TC	intergenic_variant
Prunus persica	PXL	Pp01	8723661	PXL_R2-2-2	INS:AT	intron_variant
Prunus persica	PXL	Pp01	8924507	PXL_R2-2-1	SNV:T>G	intergenic_variant
Prunus persica	PXL	Pp01	10932834	PXL_R1-2-1	SNV:T>C	intergenic_variant
Prunus persica	PXL	Pp01	14323689	PXL_R1-1;PXL_R1-2-1;PXL_R1-2-2;PXL_R1-2-3;PXL_R1-2-4	DEL:T	intergenic_variant
Prunus persica	PXL	Pp01	14357348	PXL_R1-1	SNV:G>A	intron_variant
Prunus persica	PXL	Pp01	14720368	PXL_R2-1-1	DEL:A	intergenic_variant
Prunus persica	PXL	Pp01	15131095	PXL_R1-1	SNV:G>C	intergenic_variant
Prunus persica	PXL	Pp01	15449983	PXL_R1-2M;PXL_R1-1;PXL_R1-2-1;PXL_R1-2-2;PXL_R1-2-3;PXL_R1-2-4;PXL_R1-2-5	DEL:C	intergenic_variant
Prunus persica	PXL	Pp01	16098610	PXL_R2-2-1	SNV:G>T	intergenic_variant
Prunus persica	PXL	Pp01	17341667	PXL_R2-1-2	SNV:T>C	intergenic_variant
Prunus persica	PXL	Pp01	17573008	PXL_R1-1	INS:T	intergenic_variant
Prunus persica	PXL	Pp01	18178116	PXL_B1-2L1;PXL_B2-1-2;PXL_B3-1L1;PXL_B4-1L1;PXL_B4-2;PXL_B5-1-1;PXL_B5-1-2;PXL_B6-2-1L1;PXL_B1-1L1;PXL_B2-1-1;PXL_B2-1-4L1;PXL_B4-3;PXL_B6-1-1L1;PXL_B6-1-2L1;PXL_B6-2-2L1	SNV:G>T	intergenic_variant
Prunus persica	PXL	Pp01	20347082	PXL_R2-1-2	SNV:G>C	intergenic_variant
Prunus persica	PXL	Pp01	21039805	PXL_R1-2M;PXL_R1-1;PXL_R1-2-1;PXL_R1-2-2;PXL_R1-2-3;PXL_R1-2-4;PXL_R1-2-5	SNV:T>A	intron_variant
Prunus persica	PXL	Pp01	21142584	PXL_R2-1-1	SNV:A>T	intergenic_variant
Prunus persica	PXL	Pp01	21459865	PXL_R2-2-1	SNV:G>T	intergenic_variant
Prunus persica	PXL	Pp01	22708726	PXL_R1-2M;PXL_R1-2-1;PXL_R1-2-2;PXL_R1-2-3;PXL_R1-2-4;PXL_R1-2-5	SNV:C>T	intergenic_variant
Prunus persica	PXL	Pp01	23051089	PXL_R1-2M;PXL_R1-1;PXL_R1-2-4	SNV:G>A	intergenic_variant
Prunus persica	PXL	Pp01	23432534	PXL_R2-1-1	INS:AAA	intron_variant
Prunus persica	PXL	Pp01	23553252	PXL_R4	SNV:C>T	intergenic_variant
Prunus persica	PXL	Pp01	23885007	PXL_R1-2M;PXL_R1-2-1;PXL_R1-2-2;PXL_R1-2-3;PXL_R1-2-4;PXL_R1-2-5	INS:T	intergenic_variant
Prunus persica	PXL	Pp01	23910935	PXL_B3-1L1;PXL_B3-2L1;PXL_B5-1-1;PXL_B5-1-2;PXL_B5-1-3L1	SNV:G>A	intergenic_variant
Prunus persica	PXL	Pp01	24586114	PXL_R2-1-1	SNV:G>C	intergenic_variant
Prunus persica	PXL	Pp01	25618885	PXL_R2-2-1	SNV:C>G	intergenic_variant
Prunus persica	PXL	Pp01	26721478	PXL_R3	SNV:C>T	intergenic_variant
Prunus persica	PXL	Pp01	27530041	PXL_R1-2M;PXL_R1-2-1;PXL_R1-2-2;PXL_R1-2-3;PXL_R1-2-4;PXL_R1-2-5	INS:T	3_prime_UTR_variant
Prunus persica	PXL	Pp01	27908673	PXL_B5-1-1;PXL_B5-1-2	INS:AT	intergenic_variant
Prunus persica	PXL	Pp01	28225671	PXL_R1-2M;PXL_R1-1;PXL_R1-2-1;PXL_R1-2-2;PXL_R1-2-3;PXL_R1-2-4;PXL_R1-2-5	DEL:T	intergenic_variant
Prunus persica	PXL	Pp01	29795896	PXL_R2-1-2	SNV:G>A	intergenic_variant
Prunus persica	PXL	Pp01	30611086	PXL_R2-2-1	DEL:A	intron_variant
Prunus persica	PXL	Pp01	30957124	PXL_B5-1-1;PXL_B5-1-2	INS:AT	intergenic_variant
Prunus persica	PXL	Pp01	31147142	PXL_R1-1	SNV:C>T	intergenic_variant
Prunus persica	PXL	Pp01	31537723	PXL_B5-1-3L1	SNV:G>A	missense_variant
Prunus persica	PXL	Pp01	31638720	PXL_R1-1	INS:T	intergenic_variant
Prunus persica	PXL	Pp01	31744084	PXL_R4	SNV:T>A	5_prime_UTR_variant
Prunus persica	PXL	Pp01	31799211	PXL_B6-3-1L1	SNV:G>A	intergenic_variant
Prunus persica	PXL	Pp01	31817050	PXL_B5-1-3L1	SNV:A>T	intergenic_variant
Prunus persica	PXL	Pp01	32623750	PXL_R1-2-2	SNV:T>A	intergenic_variant
Prunus persica	PXL	Pp01	33777820	PXL_R4	SNV:C>T	intron_variant
Prunus persica	PXL	Pp01	34162834	PXL_R1-2M;PXL_R1-2-1;PXL_R1-2-2;PXL_R1-2-3;PXL_R1-2-4;PXL_R1-2-5	SNV:G>T	intergenic_variant
Prunus persica	PXL	Pp01	34642372	PXL_B2-1-2;PXL_B4-2;PXL_B5-1-1;PXL_B2-1-4L1;PXL_B2-1-5L1;PXL_B3-1L1;PXL_B5-1-2;PXL_B6-1-1L1;PXL_B6-2-2L1	DEL:AT	intergenic_variant
Prunus persica	PXL	Pp01	34854307	PXL_R2-2-1	DEL:C	intergenic_variant
Prunus persica	PXL	Pp01	39288832	PXL_R2-1-1	SNV:T>C	intron_variant
Prunus persica	PXL	Pp01	39907844	PXL_R1-2-2;PXL_R1-2-3;PXL_R1-2-4;PXL_R1-2-5	INS:AAACTGTTTTTGAA	intergenic_variant
Prunus persica	PXL	Pp01	40407762	PXL_R2-2-1	SNV:A>T	3_prime_UTR_variant
Prunus persica	PXL	Pp01	41068333	PXL_B6-2-1L1;PXL_B6-3-2L1	SNV:C>A	intergenic_variant
Prunus persica	PXL	Pp01	44005252	PXL_R4	SNV:G>A	intergenic_variant
Prunus persica	PXL	Pp01	44631302	PXL_R2-1-1	DEL:AGC	disruptive_inframe_deletion
Prunus persica	PXL	Pp01	44839168	PXL_B3-1L1;PXL_B3-2L1	SNV:G>A	intergenic_variant
Prunus persica	PXL	Pp01	45229571	PXL_R1-2-1;PXL_R1-2-2;PXL_R1-2-3	INS:T	intergenic_variant
Prunus persica	PXL	Pp01	45316020	PXL_B3-1L1;PXL_B3-2L1	SNV:C>T	missense_variant
Prunus persica	PXL	Pp01	46195873	PXL_R2-2-1	INS:GT	intron_variant
Prunus persica	PXL	Pp01	46524179	PXL_R1-2-2;PXL_R1-2-5	SNV:T>A	intergenic_variant
Prunus persica	PXL	Pp01	47355986	PXL_R4	INS:C	5_prime_UTR_variant
Prunus persica	PXL	Pp02	312530	PXL_R1-2-3;PXL_R1-2-4	SNV:A>T	intergenic_variant
Prunus persica	PXL	Pp02	1770969	PXL_B6-3-2L1	SNV:C>A	intergenic_variant
Prunus persica	PXL	Pp02	3491624	PXL_B2-2-1L1	SNV:G>A	intron_variant
Prunus persica	PXL	Pp02	5200980	PXL_R2-2-1	SNV:C>T	intergenic_variant
Prunus persica	PXL	Pp02	7059851	PXL_B3-1L1;PXL_B3-2L1	SNV:G>T	intergenic_variant
Prunus persica	PXL	Pp02	9279658	PXL_R2-2-1	SNV:G>T	intergenic_variant
Prunus persica	PXL	Pp02	9633953	PXL_R2-1-2	SNV:G>T	intergenic_variant
Prunus persica	PXL	Pp02	10761032	PXL_R2-2-2	DEL:CCT	intergenic_variant
Prunus persica	PXL	Pp02	11619163	PXL_R1-2M;PXL_R1-2-1;PXL_R1-2-2;PXL_R1-2-3;PXL_R1-2-4;PXL_R1-2-5	INS:CT	intergenic_variant
Prunus persica	PXL	Pp02	12880955	PXL_B1-1L1	SNV:A>T	intergenic_variant
Prunus persica	PXL	Pp02	12895054	PXL_B6-3-1L1	SNV:G>T	intergenic_variant
Prunus persica	PXL	Pp02	13633361	PXL_B3-1L1;PXL_B3-2L1	SNV:G>A	intergenic_variant
Prunus persica	PXL	Pp02	13994725	PXL_R1-2M	SNV:T>G	intergenic_variant
Prunus persica	PXL	Pp02	15600040	PXL_R2-2-1	SNV:G>C	missense_variant
Prunus persica	PXL	Pp02	17717544	PXL_R1-2M;PXL_R1-1;PXL_R1-2-1;PXL_R1-2-2;PXL_R1-2-3;PXL_R1-2-4;PXL_R1-2-5	SNV:T>G	intergenic_variant
Prunus persica	PXL	Pp02	22510243	PXL_B5-1-1;PXL_B5-1-2;PXL_B5-1-3L1	SNV:T>A	intergenic_variant
Prunus persica	PXL	Pp02	22743583	PXL_B4-2	SNV:A>T	missense_variant
Prunus persica	PXL	Pp02	25652627	PXL_R2-1-1	SNV:G>A	5_prime_UTR_variant
Prunus persica	PXL	Pp02	26457851	PXL_R3	DEL:AGAGAGAGAGAGAGAGAGAG	intron_variant
Prunus persica	PXL	Pp02	28523936	PXL_R1-2M	INS:TA	intergenic_variant
Prunus persica	PXL	Pp02	29025583	PXL_B6-1-2L1	INS:T	intergenic_variant
Prunus persica	PXL	Pp02	29025592	PXL_B6-1-2L1	INS:A	intergenic_variant
Prunus persica	PXL	Pp02	30074771	PXL_R1-2M;PXL_R1-1;PXL_R1-2-1;PXL_R1-2-2;PXL_R1-2-3;PXL_R1-2-4;PXL_R1-2-5	SNV:G>C	3_prime_UTR_variant
Prunus persica	PXL	Pp03	257699	PXL_BA1	SNV:C>A	intergenic_variant
Prunus persica	PXL	Pp03	698352	PXL_R1-2M;PXL_R1-1;PXL_R1-2-1;PXL_R1-2-2;PXL_R1-2-4;PXL_R1-2-5	INS:TA	intergenic_variant
Prunus persica	PXL	Pp03	1383005	PXL_R1-1;PXL_R1-2-1;PXL_R1-2-2;PXL_R1-2-3;PXL_R1-2-5	SNV:T>A	intergenic_variant
Prunus persica	PXL	Pp03	2414237	PXL_R2-2-1	SNV:C>T	intron_variant
Prunus persica	PXL	Pp03	2605035	PXL_R2-1-1;PXL_R2-1-2	SNV:C>T	intergenic_variant
Prunus persica	PXL	Pp03	3388896	PXL_R2-1-1	SNV:C>T	intergenic_variant
Prunus persica	PXL	Pp03	3409264	PXL_R1-2M;PXL_R1-2-1;PXL_R1-2-2;PXL_R1-2-3;PXL_R1-2-4;PXL_R1-2-5	INS:AG	intron_variant
Prunus persica	PXL	Pp03	3668463	PXL_R1-2M;PXL_R1-1;PXL_R1-2-1;PXL_R1-2-2;PXL_R1-2-3;PXL_R1-2-4	DEL:T	intergenic_variant
Prunus persica	PXL	Pp03	4765239	PXL_R1-1	SNV:G>A	intergenic_variant
Prunus persica	PXL	Pp03	6920487	PXL_R2-2-1	SNV:C>T	intergenic_variant
Prunus persica	PXL	Pp03	7496988	PXL_B6-1-1L1;PXL_B6-1-2L1;PXL_B6-2-1L1;PXL_B6-3-2L1	SNV:T>A	intergenic_variant
Prunus persica	PXL	Pp03	7780514	PXL_R2-2-1	INS:TC	intergenic_variant
Prunus persica	PXL	Pp03	9738549	PXL_R1-2M;PXL_R1-1;PXL_R1-2-1;PXL_R1-2-2;PXL_R1-2-3;PXL_R1-2-4;PXL_R1-2-5	INS:G	intergenic_variant
Prunus persica	PXL	Pp03	10118102	PXL_B5-1-3L1	SNV:G>C	3_prime_UTR_variant
Prunus persica	PXL	Pp03	10573295	PXL_R2-2-1;PXL_R2-1-1;PXL_R2-1-2;PXL_R2-2-2	SNV:G>C	intergenic_variant
Prunus persica	PXL	Pp03	11691855	PXL_R1-2M;PXL_R1-1;PXL_R1-2-2;PXL_R1-2-3;PXL_R1-2-5	DEL:TTTTTTTTG	intergenic_variant
Prunus persica	PXL	Pp03	14225442	PXL_R2-1-1	INS:T	intergenic_variant
Prunus persica	PXL	Pp03	14999315	PXL_R1-2M;PXL_R1-1;PXL_R1-2-1;PXL_R1-2-2;PXL_R1-2-3;PXL_R1-2-4;PXL_R1-2-5	SNV:C>T	intergenic_variant
Prunus persica	PXL	Pp03	15299969	PXL_B1-1L1;PXL_B1-2L1	SNV:G>A	intergenic_variant
Prunus persica	PXL	Pp03	15346842	PXL_R1-2M;PXL_R1-1;PXL_R1-2-1;PXL_R1-2-2;PXL_R1-2-3;PXL_R1-2-4;PXL_R1-2-5	SNV:G>A	intergenic_variant
Prunus persica	PXL	Pp03	15507275	PXL_R2-2-1	SNV:C>T	intergenic_variant
Prunus persica	PXL	Pp03	17060972	PXL_R1-1	SNV:G>A	intergenic_variant
Prunus persica	PXL	Pp03	17498073	PXL_R2-2-1	SNV:A>G	intergenic_variant
Prunus persica	PXL	Pp03	17535559	PXL_R2-2-1	SNV:G>A	intergenic_variant
Prunus persica	PXL	Pp03	17725052	PXL_B1-1L1	SNV:T>G	intergenic_variant
Prunus persica	PXL	Pp03	18393469	PXL_B3-1L1	SNV:T>G	intergenic_variant
Prunus persica	PXL	Pp03	19218414	PXL_R2-1-1	SNV:C>T	intergenic_variant
Prunus persica	PXL	Pp03	19296991	PXL_R2-1-1	INS:AT	intergenic_variant
Prunus persica	PXL	Pp03	20317445	PXL_R1-2M;PXL_R1-1;PXL_R1-2-2;PXL_R1-2-3;PXL_R1-2-4;PXL_R1-2-5	SNV:C>A	intron_variant
Prunus persica	PXL	Pp03	22052569	PXL_R2-1-1	SNV:C>T	intergenic_variant
Prunus persica	PXL	Pp03	22230136	PXL_R1-2-2;PXL_R1-2-3;PXL_R1-2-4;PXL_R1-2-5	INS:GA	intergenic_variant
Prunus persica	PXL	Pp03	23056262	PXL_R1-2M;PXL_R1-2-1;PXL_R1-2-2;PXL_R1-2-3;PXL_R1-2-4;PXL_R1-2-5	INS:TCTCTCTCTCTCTCTCTC	5_prime_UTR_variant
Prunus persica	PXL	Pp03	24938861	PXL_R2-2-1	SNV:C>T	missense_variant
Prunus persica	PXL	Pp03	25325745	PXL_R2-2-1	DEL:G	intergenic_variant
Prunus persica	PXL	Pp03	25552572	PXL_B2-1-4L1	SNV:C>T	synonymous_variant
Prunus persica	PXL	Pp04	210844	PXL_BA1	DEL:TGCTGCTCTTTGATCTTT	intron_variant
Prunus persica	PXL	Pp04	2453491	PXL_R4	INS:TTTT	intergenic_variant
Prunus persica	PXL	Pp04	2503697	PXL_R4	SNV:T>A	intergenic_variant
Prunus persica	PXL	Pp04	5755905	PXL_B6-1-2L1	INS:GA	intergenic_variant
Prunus persica	PXL	Pp04	6316753	PXL_R2-1-1	SNV:T>G	intergenic_variant
Prunus persica	PXL	Pp04	8596908	PXL_B4-3;PXL_B1-2L1;PXL_B5-1-1;PXL_B6-3-1L1	DEL:TA	intergenic_variant
Prunus persica	PXL	Pp04	10487668	PXL_R3	INS:A	intergenic_variant
Prunus persica	PXL	Pp04	12754739	PXL_R2-1-2	SNV:C>T	intergenic_variant
Prunus persica	PXL	Pp04	15372992	PXL_B2-2-2L1	SNV:C>T	intergenic_variant
Prunus persica	PXL	Pp04	15513130	PXL_R2-2-1;PXL_R2-2-2	SNV:C>A	3_prime_UTR_variant
Prunus persica	PXL	Pp04	15546740	PXL_R2-2-1	SNV:C>A	intergenic_variant
Prunus persica	PXL	Pp04	16453159	PXL_R1-2M;PXL_R1-1;PXL_R1-2-1;PXL_R1-2-2;PXL_R1-2-3;PXL_R1-2-4;PXL_R1-2-5	SNV:G>A	intergenic_variant
Prunus persica	PXL	Pp04	16700131	PXL_R1-2M;PXL_R1-2-1;PXL_R1-2-2;PXL_R1-2-3;PXL_R1-2-4;PXL_R1-2-5	SNV:G>T	intergenic_variant
Prunus persica	PXL	Pp04	17439772	PXL_R3	DEL:CATGAC	intergenic_variant
Prunus persica	PXL	Pp04	17999117	PXL_R2-1-2	SNV:T>G	intergenic_variant
Prunus persica	PXL	Pp04	19352512	PXL_R1-2-2	SNV:A>G	intergenic_variant
Prunus persica	PXL	Pp04	22013488	PXL_B2-1-1;PXL_B2-1-2;PXL_B2-1-3L1;PXL_B2-1-4L1;PXL_B2-1-5L1;PXL_B2-2-1L1;PXL_B2-2-2L1	DEL:C	intron_variant
Prunus persica	PXL	Pp04	22093142	PXL_R2-1-1	SNV:A>G	intron_variant
Prunus persica	PXL	Pp04	22375082	PXL_B1-1L1;PXL_B1-2L1;PXL_B2-1-1;PXL_B2-1-2;PXL_B2-1-3L1;PXL_B2-1-4L1;PXL_B2-1-5L1;PXL_B2-2-1L1;PXL_B2-2-2L1;PXL_B3-1L1;PXL_B3-2L1;PXL_B4-1L1;PXL_B4-2;PXL_B4-3;PXL_B5-1-1;PXL_B5-1-2;PXL_B6-1-1L1;PXL_B6-1-2L1;PXL_B6-2-1L1;PXL_B6-2-2L1;PXL_B6-3-1L1;PXL_B6-3-2L1	INS:TA	intergenic_variant
Prunus persica	PXL	Pp04	22931407	PXL_R2-1-2	INS:T	intergenic_variant
Prunus persica	PXL	Pp05	129976	PXL_R2-1-2	SNV:T>C	intergenic_variant
Prunus persica	PXL	Pp05	494824	PXL_B4-1L1;PXL_B4-2;PXL_B4-3	SNV:C>G	intergenic_variant
Prunus persica	PXL	Pp05	547706	PXL_B2-1-5L1	SNV:C>T	intergenic_variant
Prunus persica	PXL	Pp05	983976	PXL_B6-1-1L1;PXL_B6-1-2L1	SNV:A>C	synonymous_variant
Prunus persica	PXL	Pp05	1370958	PXL_R1-2M;PXL_R1-1;PXL_R1-2-1;PXL_R1-2-2;PXL_R1-2-5	INS:TT	5_prime_UTR_variant
Prunus persica	PXL	Pp05	4657907	PXL_R2-1-1	SNV:A>G	intergenic_variant
Prunus persica	PXL	Pp05	8113517	PXL_R1-2M;PXL_R1-1;PXL_R1-2-1;PXL_R1-2-2;PXL_R1-2-3;PXL_R1-2-4;PXL_R1-2-5	SNV:G>C	intergenic_variant
Prunus persica	PXL	Pp05	8552381	PXL_R3	SNV:G>C	intergenic_variant
Prunus persica	PXL	Pp05	9062748	PXL_R1-2-3	SNV:C>T	intergenic_variant
Prunus persica	PXL	Pp05	9444597	PXL_R2-1-1	SNV:T>A	intergenic_variant
Prunus persica	PXL	Pp05	9981967	PXL_R1-2-1	SNV:A>T	missense_variant
Prunus persica	PXL	Pp05	11669260	PXL_R4	SNV:T>C	intergenic_variant
Prunus persica	PXL	Pp05	11973785	PXL_R1-2M;PXL_R1-1;PXL_R1-2-1;PXL_R1-2-2;PXL_R1-2-3;PXL_R1-2-4;PXL_R1-2-5	INS:A	3_prime_UTR_variant
Prunus persica	PXL	Pp05	12292756	PXL_R3	SNV:T>A	intergenic_variant
Prunus persica	PXL	Pp05	12407280	PXL_R1-2M;PXL_R1-2-1;PXL_R1-2-2;PXL_R1-2-3;PXL_R1-2-5	SNV:G>A	intergenic_variant
Prunus persica	PXL	Pp05	14176693	PXL_R4	INS:T	5_prime_UTR_variant
Prunus persica	PXL	Pp05	14631520	PXL_R3	INS:AA	intron_variant
Prunus persica	PXL	Pp05	16522465	PXL_B1-1L1;PXL_B2-1-1;PXL_B2-1-2;PXL_B2-2-1L1;PXL_B4-1L1;PXL_B4-2;PXL_B4-3;PXL_B5-1-1;PXL_B5-1-2;PXL_B6-1-1L1;PXL_B6-3-1L1;PXL_B1-2L1;PXL_B2-1-3L1;PXL_B2-1-5L1;PXL_B5-1-3L1;PXL_B6-1-2L1;PXL_B6-3-2L1	SNV:G>A	intron_variant
Prunus persica	PXL	Pp05	18295494	PXL_R1-1;PXL_R1-2-1;PXL_R1-2-2;PXL_R1-2-4;PXL_R1-2-5	INS:AT	intron_variant
Prunus persica	PXL	Pp06	3346167	PXL_R2-2-1	SNV:T>A	intron_variant
Prunus persica	PXL	Pp06	3488398	PXL_B4-1L1;PXL_B4-2;PXL_B4-3	SNV:T>C	intergenic_variant
Prunus persica	PXL	Pp06	4175600	PXL_R1-2M;PXL_R1-1;PXL_R1-2-1;PXL_R1-2-2;PXL_R1-2-3;PXL_R1-2-4;PXL_R1-2-5	DEL:T	intergenic_variant
Prunus persica	PXL	Pp06	4915244	PXL_B5-1-1	SNV:A>G	missense_variant
Prunus persica	PXL	Pp06	5097624	PXL_B1-2L1;PXL_B2-1-1;PXL_B2-1-2;PXL_B2-1-4L1;PXL_B2-1-5L1;PXL_B2-2-1L1;PXL_B3-1L1;PXL_B3-2L1;PXL_B4-2;PXL_B4-3;PXL_B5-1-1;PXL_B5-1-2;PXL_B6-2-1L1;PXL_B6-3-1L1;PXL_B1-1L1;PXL_B2-1-3L1;PXL_B4-1L1;PXL_B6-3-2L1	SNV:A>C	intergenic_variant
Prunus persica	PXL	Pp06	6733585	PXL_R2-1-1	SNV:C>A	intergenic_variant
Prunus persica	PXL	Pp06	6774925	PXL_R2-2-1	INS:GCT	intron_variant
Prunus persica	PXL	Pp06	7200593	PXL_R2-1-1;PXL_R2-1-2	INS:A	intergenic_variant
Prunus persica	PXL	Pp06	7395067	PXL_B4-2	SNV:G>A	intergenic_variant
Prunus persica	PXL	Pp06	8609232	PXL_R2-2-1	SNV:G>A	synonymous_variant
Prunus persica	PXL	Pp06	10659586	PXL_R2-1-1	SNV:T>A	intergenic_variant
Prunus persica	PXL	Pp06	12689546	PXL_R2-2-2	DEL:CTTTCAGCACCTGGACATGGCAAC	intergenic_variant
Prunus persica	PXL	Pp06	13210946	PXL_R2-2-1	DEL:AG	intergenic_variant
Prunus persica	PXL	Pp06	13642692	PXL_R1-2-3;PXL_R1-2-4	SNV:C>A	intergenic_variant
Prunus persica	PXL	Pp06	13644658	PXL_B2-1-3L1	SNV:T>G	intergenic_variant
Prunus persica	PXL	Pp06	14657674	PXL_R2-1-1	INS:T	intergenic_variant
Prunus persica	PXL	Pp06	17161451	PXL_R2-1-1	INS:GA	intergenic_variant
Prunus persica	PXL	Pp06	17221675	PXL_B6-1-1L1;PXL_B6-1-2L1;PXL_B6-2-1L1;PXL_B6-3-2L1	SNV:G>A	intergenic_variant
Prunus persica	PXL	Pp06	19973163	PXL_B6-1-1L1	SNV:C>T	intergenic_variant
Prunus persica	PXL	Pp06	20246458	PXL_R2-2-1	SNV:C>T	intergenic_variant
Prunus persica	PXL	Pp06	20308746	PXL_B6-3-1L1	SNV:C>G	3_prime_UTR_variant
Prunus persica	PXL	Pp06	21107388	PXL_R1-2-3	SNV:C>A	intergenic_variant
Prunus persica	PXL	Pp06	21206304	PXL_R2-1-2	SNV:G>A	intergenic_variant
Prunus persica	PXL	Pp06	21747511	PXL_B5-1-2	SNV:G>A	intergenic_variant
Prunus persica	PXL	Pp06	22647023	PXL_R2-1-1	SNV:A>C	intergenic_variant
Prunus persica	PXL	Pp06	22807129	PXL_R4	SNV:G>A	intergenic_variant
Prunus persica	PXL	Pp06	24195377	PXL_R1-1;PXL_R1-2-2	INS:TATT	intergenic_variant
Prunus persica	PXL	Pp06	25980187	PXL_R2-2-1	SNV:C>T	intergenic_variant
Prunus persica	PXL	Pp06	27767875	PXL_R1-2M;PXL_R1-1;PXL_R1-2-1;PXL_R1-2-2;PXL_R1-2-3;PXL_R1-2-4;PXL_R1-2-5	DEL:TCTCTCTCTC	intron_variant
Prunus persica	PXL	Pp06	30581812	PXL_R2-1-1	INS:TC	intergenic_variant
Prunus persica	PXL	Pp07	1224566	PXL_B4-3	SNV:T>C	intergenic_variant
Prunus persica	PXL	Pp07	3737754	PXL_B2-1-1	SNV:C>T	intergenic_variant
Prunus persica	PXL	Pp07	4622684	PXL_R1-2M;PXL_R1-2-5	SNV:C>T	intergenic_variant
Prunus persica	PXL	Pp07	4780594	PXL_B1-1L1;PXL_B1-2L1	SNV:G>A	intergenic_variant
Prunus persica	PXL	Pp07	5472121	PXL_R2-1-1	SNV:C>T	intergenic_variant
Prunus persica	PXL	Pp07	5842329	PXL_R2-1-1	SNV:C>A	missense_variant
Prunus persica	PXL	Pp07	6782316	PXL_B2-2-1L1	SNV:G>A	intergenic_variant
Prunus persica	PXL	Pp07	8589832	PXL_B2-1-1	SNV:C>A	intergenic_variant
Prunus persica	PXL	Pp07	9522449	PXL_R2-1-1	SNV:C>T	intergenic_variant
Prunus persica	PXL	Pp07	9567808	PXL_R1-2M;PXL_R1-2-1;PXL_R1-2-2;PXL_R1-2-3;PXL_R1-2-4;PXL_R1-2-5	INS:A	intron_variant
Prunus persica	PXL	Pp07	10652552	PXL_R2-1-1	INS:AG	intergenic_variant
Prunus persica	PXL	Pp07	10776505	PXL_R4	SNV:C>A	intergenic_variant
Prunus persica	PXL	Pp07	12851175	PXL_R2-2-1	SNV:G>A	intergenic_variant
Prunus persica	PXL	Pp07	12973886	PXL_B3-2L1	SNV:G>A	intergenic_variant
Prunus persica	PXL	Pp07	14101773	PXL_R1-1	SNV:G>A	intergenic_variant
Prunus persica	PXL	Pp07	14474684	PXL_R1-1	DEL:CCA	intergenic_variant
Prunus persica	PXL	Pp07	14730929	PXL_B6-1-2L1	SNV:C>T	intron_variant
Prunus persica	PXL	Pp07	17136272	PXL_R2-2-2	INS:G	intergenic_variant
Prunus persica	PXL	Pp07	17188650	PXL_R3	DEL:TTTG	intergenic_variant
Prunus persica	PXL	Pp07	18635052	PXL_R1-2-2;PXL_R1-2-3;PXL_R1-2-4;PXL_R1-2-5	SNV:T>C	synonymous_variant
Prunus persica	PXL	Pp07	19075661	PXL_R1-2M;PXL_R1-2-4	INS:T	intergenic_variant
Prunus persica	PXL	Pp07	19344045	PXL_R2-1-1	SNV:G>A	intron_variant
Prunus persica	PXL	Pp07	19447286	PXL_R1-2-2;PXL_R1-2-5	SNV:A>C	intergenic_variant
Prunus persica	PXL	Pp07	19447286	PXL_R1-2-3;PXL_R1-2-4;PXL_R1-2-5	SNV:A>G	intergenic_variant
Prunus persica	PXL	Pp07	20007582	PXL_B4-2	DEL:GT	intergenic_variant
Prunus persica	PXL	Pp07	20573138	PXL_R1-2-3;PXL_R1-2-4	INS:TCTCTA	intron_variant
Prunus persica	PXL	Pp08	4419164	PXL_B6-1-1L1	SNV:G>A	intergenic_variant
Prunus persica	PXL	Pp08	5882863	PXL_B4-3	SNV:C>T	intergenic_variant
Prunus persica	PXL	Pp08	6654277	PXL_B6-3-1L1	SNV:C>T	intergenic_variant
Prunus persica	PXL	Pp08	7823847	PXL_R1-2M;PXL_R1-2-1;PXL_R1-2-2;PXL_R1-2-3;PXL_R1-2-4;PXL_R1-2-5	SNV:G>C	intergenic_variant
Prunus persica	PXL	Pp08	10035442	PXL_R1-2M;PXL_R1-1;PXL_R1-2-1;PXL_R1-2-2;PXL_R1-2-3;PXL_R1-2-4;PXL_R1-2-5	SNV:G>A	intergenic_variant
Prunus persica	PXL	Pp08	10468404	PXL_R2-1-1	SNV:G>A	intergenic_variant
Prunus persica	PXL	Pp08	10666436	PXL_B5-1-2	DEL:TA	intergenic_variant
Prunus persica	PXL	Pp08	10719623	PXL_B6-3-2L1	SNV:G>A	intergenic_variant
Prunus persica	PXL	Pp08	11523169	PXL_R2-2-1	INS:A	intergenic_variant
Prunus persica	PXL	Pp08	12331820	PXL_R3	SNV:T>C	5_prime_UTR_variant
Prunus persica	PXL	Pp08	13432488	PXL_R2-1-2	INS:A	intron_variant
Prunus persica	PXL	Pp08	13753142	PXL_R1-1	SNV:A>T	intergenic_variant
Prunus persica	PXL	Pp08	14244176	PXL_R4	DEL:C	intron_variant
Prunus persica	PXL	Pp08	14900235	PXL_B5-1-3L1	SNV:C>T	intergenic_variant
Prunus persica	PXL	Pp08	15800308	PXL_R2-1-1	DEL:CTCTCTCTCTCTCTCTCCCTCTCTCTCT	5_prime_UTR_variant
Prunus persica	PXL	Pp08	16420303	PXL_R1-2M;PXL_R1-1;PXL_R1-2-1;PXL_R1-2-2;PXL_R1-2-3;PXL_R1-2-4;PXL_R1-2-5	INS:A	intergenic_variant
Prunus persica	PXL	Pp08	17666891	PXL_R3	DEL:C	intergenic_variant
Prunus persica	PXL	Pp08	19333793	PXL_R2-2-1	SNV:A>G	intergenic_variant
Prunus persica	PXL	Pp08	19632925	PXL_R2-2-1	DEL:GG	intergenic_variant
Prunus persica	PXL	Pp08	21257693	PXL_R2-1-1;PXL_R2-1-2	DEL:TC	5_prime_UTR_variant
Prunus persica	PXL	Pp08	21688266	PXL_R2-2-1	SNV:C>A	intergenic_variant
Brachypodium distachyon	WD2	Bd1	6436942	WD2_R1	SNV:C>T	intergenic_variant
Brachypodium distachyon	WD2	Bd1	7285735	WD2_R7	INS:GCCGG	frameshift_variant
Brachypodium distachyon	WD2	Bd1	16921888	WD2_B2-1-1-L1;WD2_B2-1-1-L2;WD2_B2-1-1-L3;WD2_B2-2-L1	SNV:G>A	intergenic_variant
Brachypodium distachyon	WD2	Bd1	19847729	WD2_B3-2-L2;WD2_B3-2-L3;WD2_B3-2-L4;WD2_B3-2-S1	INS:TGAGAAT	intergenic_variant
Brachypodium distachyon	WD2	Bd1	27100749	WD2_R2	SNV:C>G	intergenic_variant
Brachypodium distachyon	WD2	Bd1	35482616	WD2_R6	SNV:G>A	intergenic_variant
Brachypodium distachyon	WD2	Bd1	36658065	WD2_B2-1-1-L1;WD2_B2-1-1-L2;WD2_B2-1-1-L3;WD2_B2-2-L1	SNV:C>T	intergenic_variant
Brachypodium distachyon	WD2	Bd1	40656358	WD2_B3-1-L1;WD2_B3-1-L2;WD2_B3-1-L3;WD2_B3-3-L1	SNV:A>T	intergenic_variant
Brachypodium distachyon	WD2	Bd1	42224468	WD2_B3-1-L1;WD2_B3-1-L2;WD2_B3-1-L4	SNV:C>T	intergenic_variant
Brachypodium distachyon	WD2	Bd1	45340335	WD2_B1-2-L2;WD2_B1-2-L3	DEL:C	intergenic_variant
Brachypodium distachyon	WD2	Bd1	52323596	WD2_B3-1-L1;WD2_B3-3-L1	SNV:C>G	intergenic_variant
Brachypodium distachyon	WD2	Bd1	53628181	WD2_R1;WD2_R8	SNV:G>A	synonymous_variant
Brachypodium distachyon	WD2	Bd1	59739869	WD2_R10	SNV:G>A	intergenic_variant
Brachypodium distachyon	WD2	Bd1	63111028	WD2_R4	SNV:C>G	intergenic_variant
Brachypodium distachyon	WD2	Bd1	69366773	WD2_R10;WD2_R9	SNV:T>C	intergenic_variant
Brachypodium distachyon	WD2	Bd2	593574	WD2_B3-2-L2;WD2_B3-2-L3;WD2_B3-2-L4	SNV:C>T	intergenic_variant
Brachypodium distachyon	WD2	Bd2	14242152	WD2_B3-2-L2;WD2_B3-2-L3;WD2_B3-2-L4;WD2_B3-2-S1;WD2_B3-3-L1	SNV:C>G	intergenic_variant
Brachypodium distachyon	WD2	Bd2	14454626	WD2_R10	SNV:G>C	3_prime_UTR_variant
Brachypodium distachyon	WD2	Bd2	15147637	WD2_R1	SNV:C>T	intergenic_variant
Brachypodium distachyon	WD2	Bd2	17723616	WD2_R9	SNV:G>T	intron_variant
Brachypodium distachyon	WD2	Bd2	19012227	WD2_B3-2-L2;WD2_B3-2-L3;WD2_B3-2-L4;WD2_B3-2-S1	SNV:G>A	intergenic_variant
Brachypodium distachyon	WD2	Bd2	23240207	WD2_B2-1-2-1-S1	SNV:C>G	intergenic_variant
Brachypodium distachyon	WD2	Bd2	30178464	WD2_R10	SNV:G>A	intergenic_variant
Brachypodium distachyon	WD2	Bd2	32229806	WD2_B2-1-2-2-L2;WD2_B2-1-2-2-S1	SNV:G>A	intergenic_variant
Brachypodium distachyon	WD2	Bd2	36971552	WD2_B2-1-2-1-L2;WD2_B2-1-2-1-L3	SNV:G>A	intron_variant
Brachypodium distachyon	WD2	Bd2	37262210	WD2_B2-1-1-L2;WD2_B2-1-1-L3;WD2_B2-1-1-S1	SNV:G>T	intergenic_variant
Brachypodium distachyon	WD2	Bd2	39238136	WD2_B1-1-L2;WD2_B1-1-L3;WD2_B1-1-L4;WD2_B1-1-S1-1;WD2_B1-1-S1-2;WD2_B1-2-L1	SNV:C>T	intergenic_variant
Brachypodium distachyon	WD2	Bd2	40229643	WD2_R6	SNV:A>G	missense_variant
Brachypodium distachyon	WD2	Bd3	4523791	WD2_B2-2-L3;WD2_B2-2-L4;WD2_B2-2-L5	SNV:T>C	intergenic_variant
Brachypodium distachyon	WD2	Bd3	8080219	WD2_B2-1-2-2-L2;WD2_B2-1-2-2-L3	SNV:G>A	intergenic_variant
Brachypodium distachyon	WD2	Bd3	10388502	WD2_B2-1-2-2-L2;WD2_B2-1-2-2-L3	SNV:G>A	missense_variant
Brachypodium distachyon	WD2	Bd3	11819525	WD2_B2-1-1-S1	SNV:T>C	intergenic_variant
Brachypodium distachyon	WD2	Bd3	14549604	WD2_B1-1-S1-1	SNV:C>T	intergenic_variant
Brachypodium distachyon	WD2	Bd3	16757657	WD2_R1	INS:CTT	intergenic_variant
Brachypodium distachyon	WD2	Bd3	17372976	WD2_B2-1-2-2-L2;WD2_B2-1-2-2-L3;WD2_B2-1-2-2-S1	SNV:A>G	intergenic_variant
Brachypodium distachyon	WD2	Bd3	17614339	WD2_B1-1-L4;WD2_B1-2-L1	MNV:GA>AT	intergenic_variant
Brachypodium distachyon	WD2	Bd3	20309539	WD2_B1-1-L1;WD2_B1-1-L2;WD2_B1-1-L4;WD2_B1-1-S1-1	SNV:G>A	intergenic_variant
Brachypodium distachyon	WD2	Bd3	20567072	WD2_R1	SNV:C>T	intergenic_variant
Brachypodium distachyon	WD2	Bd3	22011812	WD2_B2-2-L3;WD2_B2-2-L5	SNV:G>A	intron_variant
Brachypodium distachyon	WD2	Bd3	23087701	WD2_R10	SNV:T>A	intergenic_variant
Brachypodium distachyon	WD2	Bd3	23579379	WD2_R4	SNV:G>C	intergenic_variant
Brachypodium distachyon	WD2	Bd3	24009967	WD2_B2-2-L3	SNV:T>G	intergenic_variant
Brachypodium distachyon	WD2	Bd3	29536332	WD2_B1-1-L1	SNV:C>T	intergenic_variant
Brachypodium distachyon	WD2	Bd3	30332089	WD2_B2-1-2-1-L1;WD2_B2-1-2-1-L2;WD2_B2-1-2-1-L3;WD2_B2-1-2-1-S1;WD2_B2-1-2-2-L2;WD2_B2-1-2-2-L3	SNV:A>G	intergenic_variant
Brachypodium distachyon	WD2	Bd3	30344853	WD2_B3-1-L4	SNV:T>C	intron_variant
Brachypodium distachyon	WD2	Bd3	39486373	WD2_R10	SNV:A>G	5_prime_UTR_variant
Brachypodium distachyon	WD2	Bd3	40451060	WD2_R10	SNV:G>A	intergenic_variant
Brachypodium distachyon	WD2	Bd3	45578956	WD2_B2-1-2-2-L2;WD2_B2-1-2-2-L3	SNV:G>A	intergenic_variant
Brachypodium distachyon	WD2	Bd3	47796783	WD2_R8	SNV:G>A	intergenic_variant
Brachypodium distachyon	WD2	Bd3	47904499	WD2_R7	SNV:G>A	intergenic_variant
Brachypodium distachyon	WD2	Bd3	52192286	WD2_B2-2-S1-1	SNV:C>G	intergenic_variant
Brachypodium distachyon	WD2	Bd3	58936245	WD2_B2-1-2-2-L2;WD2_B2-1-2-2-S1	SNV:C>T	intergenic_variant
Brachypodium distachyon	WD2	Bd4	9152289	WD2_B2-1-2-1-L1;WD2_B2-1-2-1-L2;WD2_B2-1-2-1-L3;WD2_B2-1-2-2-L2;WD2_B2-1-2-2-L3	SNV:G>C	3_prime_UTR_variant
Brachypodium distachyon	WD2	Bd4	11779591	WD2_R7	SNV:A>G	missense_variant
Brachypodium distachyon	WD2	Bd4	16620801	WD2_B2-1-2-2-L3	SNV:C>G	intergenic_variant
Brachypodium distachyon	WD2	Bd4	18543454	WD2_B2-1-1-L1;WD2_B2-1-2-1-L1;WD2_B2-1-2-1-L2;WD2_B2-1-2-1-L3;WD2_B2-1-2-2-L1	SNV:C>T	intergenic_variant
Brachypodium distachyon	WD2	Bd4	19996433	WD2_B2-1-2-2-L3	SNV:G>A	intergenic_variant
Brachypodium distachyon	WD2	Bd4	24038833	WD2_B2-1-1-L3	SNV:G>T	intergenic_variant
Brachypodium distachyon	WD2	Bd4	24666609	WD2_B2-1-1-S1	SNV:C>T	intergenic_variant
Brachypodium distachyon	WD2	Bd4	26284734	WD2_R8	SNV:C>T	intergenic_variant
Brachypodium distachyon	WD2	Bd4	26999778	WD2_R10	SNV:C>T	intergenic_variant
Brachypodium distachyon	WD2	Bd4	27791916	WD2_B1-2-L3	SNV:T>C	intron_variant
Brachypodium distachyon	WD2	Bd4	29752156	WD2_R8	SNV:C>T	intergenic_variant
Brachypodium distachyon	WD2	Bd4	30584750	WD2_R1	SNV:A>G	intron_variant
Brachypodium distachyon	WD2	Bd4	31188711	WD2_R1	SNV:G>A	intron_variant
Brachypodium distachyon	WD2	Bd4	39217055	WD2_R10;WD2_R9	SNV:C>A	intron_variant
Brachypodium distachyon	WD2	Bd4	45450343	WD2_B2-1-2-2-S1	SNV:C>T	intergenic_variant
Brachypodium distachyon	WD2	Bd4	47027713	WD2_R10	SNV:G>C	intergenic_variant
Brachypodium distachyon	WD2	Bd5	4228009	WD2_B2-2-L4;WD2_B2-2-L5	SNV:C>T	intergenic_variant
Brachypodium distachyon	WD2	Bd5	6412244	WD2_R6	SNV:G>A	intergenic_variant
Brachypodium distachyon	WD2	Bd5	7652678	WD2_R8	SNV:C>T	intergenic_variant
Brachypodium distachyon	WD2	Bd5	9318422	WD2_R1	SNV:C>T	intergenic_variant
Brachypodium distachyon	WD2	Bd5	10185045	WD2_R7	SNV:G>A	intergenic_variant
Brachypodium distachyon	WD2	Bd5	11119502	WD2_B3-2-L2;WD2_B3-2-L3;WD2_B3-2-L4;WD2_B3-2-S1	SNV:C>T	intergenic_variant
Brachypodium distachyon	WD2	Bd5	12880379	WD2_B3-1-L1;WD2_B3-1-L2;WD2_B3-1-L3;WD2_B3-1-L4;WD2_B3-3-L1	SNV:C>T	intergenic_variant
Brachypodium distachyon	WD2	Bd5	17093960	WD2_R6	SNV:C>T	intron_variant
Brachypodium distachyon	WD2	Bd5	26617899	WD2_R7	SNV:C>T	intergenic_variant
Prunus persica	HY2	Pp01	1264739	HY2_B1-3-1-3-H1;HY2_B1-3-1-3-H2	SNV:G>A	intergenic_variant
Prunus persica	HY2	Pp01	3553085	HY2_B2-1-1-1-H1	SNV:C>T	intergenic_variant
Prunus persica	HY2	Pp01	5666133	HY2_B1-2-2-1-H1-1;HY2_B1-2-2-1-H1-2;HY2_B1-2-2-1-H1-3	SNV:G>A	intergenic_variant
Prunus persica	HY2	Pp01	6336432	HY2_B1-2-1-2-2-L1	DEL:TACAGTAC	3_prime_UTR_variant
Prunus persica	HY2	Pp01	6779958	HY2_B2-1-1-1-H1;HY2_B2-1-2-1-3-H1	DEL:A	intergenic_variant
Prunus persica	HY2	Pp01	9782047	HY2_B1-1-L1	SNV:C>T	intergenic_variant
Prunus persica	HY2	Pp01	12138832	HY2_B1-2-1-2-2-L1	SNV:G>A	intergenic_variant
Prunus persica	HY2	Pp01	17080896	HY2_B1-3-1-3-L1;HY2_B1-3-1-3-H1;HY2_B1-3-1-3-H2	SNV:C>T	intergenic_variant
Prunus persica	HY2	Pp01	18832511	HY2_B1-3-1-3-H1;HY2_B1-3-1-3-H2	SNV:A>C	intergenic_variant
Prunus persica	HY2	Pp01	21672953	HY2_B1-3-1-3-H2	SNV:G>T	intergenic_variant
Prunus persica	HY2	Pp01	22439200	HY2_B1-2-2-1-L1;HY2_B1-2-2-1-H1-3	SNV:T>A	intergenic_variant
Prunus persica	HY2	Pp01	23319189	HY2_B2-1-T1-L1	SNV:A>G	intergenic_variant
Prunus persica	HY2	Pp01	25103026	HY2_B1-2-2-1-H1-3	SNV:G>A	intergenic_variant
Prunus persica	HY2	Pp01	25785955	HY2_B1-2-2-1-H1-3	DEL:ATA	intergenic_variant
Prunus persica	HY2	Pp01	26573467	HY2_B1-3-1-3-L1;HY2_B1-3-1-3-H1	SNV:C>T	intergenic_variant
Prunus persica	HY2	Pp01	27174986	HY2_B1-2-1-2-2-L1	SNV:A>C	intergenic_variant
Prunus persica	HY2	Pp01	32571099	HY2_B2-2-L1	SNV:A>G	intron_variant
Prunus persica	HY2	Pp01	32680643	HY2_B1-2-2-1-H1-1;HY2_B1-2-2-1-H1-2;HY2_B1-2-2-1-H1-3	SNV:C>T	intergenic_variant
Prunus persica	HY2	Pp01	34637064	HY2_B1-2-1-2-2-L1	INS:A	intergenic_variant
Prunus persica	HY2	Pp01	35378490	HY2_B1-3-1-3-H1;HY2_B1-3-1-3-H2	SNV:G>A	intergenic_variant
Prunus persica	HY2	Pp01	37710175	HY2_B1-2-2-1-L1;HY2_B1-2-2-1-H1-1;HY2_B1-2-2-1-H1-2;HY2_B1-2-2-1-H1-3	SNV:A>G	intron_variant
Prunus persica	HY2	Pp01	40433090	HY2_B1-2-2-2-H1	INS:A	intergenic_variant
Prunus persica	HY2	Pp01	41332666	HY2_B1-1-L1	SNV:G>A	intergenic_variant
Prunus persica	HY2	Pp01	41620507	HY2_B1-2-2-2-H1;HY2_B1-2-2-2-L1	SNV:C>T	intergenic_variant
Prunus persica	HY2	Pp01	41750081	HY2_B1-2-1-2-2-L1	SNV:T>A	intergenic_variant
Prunus persica	HY2	Pp01	41888907	HY2_B1-2-1-2-1-L1	SNV:G>A	intergenic_variant
Prunus persica	HY2	Pp01	42405266	HY2_B1-3-1-2-L1	SNV:C>G	intergenic_variant
Prunus persica	HY2	Pp01	46087149	HY2_B1-2-1-2-1-L1	SNV:C>T	intergenic_variant
Prunus persica	HY2	Pp01	46842860	HY2_B1-3-1-3-H1;HY2_B1-3-1-3-H2	INS:GCGGTT	5_prime_UTR_variant
Prunus persica	HY2	Pp02	1299863	HY2_B2-1-2-1-3-H1	SNV:A>G	intergenic_variant
Prunus persica	HY2	Pp02	4073628	HY2_B1-3-1-3-L1	SNV:C>T	3_prime_UTR_variant
Prunus persica	HY2	Pp02	4752471	HY2_B1-1-L1	INS:A	intergenic_variant
Prunus persica	HY2	Pp02	8260397	HY2_B1-2-2-1-L1;HY2_B1-2-2-1-H1-1;HY2_B1-2-2-1-H1-2;HY2_B1-2-2-1-H1-3	SNV:G>A	intergenic_variant
Prunus persica	HY2	Pp02	10279060	HY2_B1-1-H1	SNV:G>A	intergenic_variant
Prunus persica	HY2	Pp02	14847677	HY2_B1-2-2-2-L1	SNV:C>T	intergenic_variant
Prunus persica	HY2	Pp02	15340259	HY2_B2-1-2-1-1-H1	INS:T	3_prime_UTR_variant
Prunus persica	HY2	Pp02	15528715	HY2_B1-2-1-2-1-L1;HY2_B1-2-1-2-2-L1;HY2_B1-2-1-3-L1;HY2_B1-2-2-1-H1-1;HY2_B1-2-2-1-H1-2;HY2_B1-2-2-1-H1-3;HY2_B1-2-2-2-H1	SNV:G>C	intergenic_variant
Prunus persica	HY2	Pp02	16427855	HY2_B1-2-1-2-2-L1	SNV:C>T	intron_variant
Prunus persica	HY2	Pp02	16603809	HY2_B1-3-1-3-H1	SNV:C>T	intergenic_variant
Prunus persica	HY2	Pp02	20851597	HY2_B2-T1-L1	SNV:G>A	5_prime_UTR_premature_start_codon_gain_variant
Prunus persica	HY2	Pp02	22540117	HY2_B2-1-2-1-3-H1;HY2_B2-1-2-1-3-H2;HY2_B2-1-2-1-3-H3	SNV:A>T	intergenic_variant
Prunus persica	HY2	Pp02	26992103	HY2_B2-2-L1	INS:CT	intergenic_variant
Prunus persica	HY2	Pp02	28403876	HY2_B2-1-1-3-L1	SNV:A>G	intergenic_variant
Prunus persica	HY2	Pp02	28853079	HY2_B2-1-1-1-H1	SNV:C>T	intergenic_variant
Prunus persica	HY2	Pp02	29975741	HY2_B2-2-L1	SNV:T>C	intergenic_variant
Prunus persica	HY2	Pp02	30275116	HY2_B1-2-1-2-1-L1;HY2_B1-2-1-2-2-L1;HY2_B1-2-1-3-L1	SNV:C>T	intergenic_variant
Prunus persica	HY2	Pp02	30397324	HY2_B1-2-2-1-H1-1;HY2_B1-2-2-1-H1-2;HY2_B1-2-2-1-H1-3	SNV:T>G	intergenic_variant
Prunus persica	HY2	Pp03	6233064	HY2_B2-1-2-1-3-H1;HY2_B2-1-2-1-3-H2;HY2_B2-1-2-1-3-H3	SNV:G>A	intergenic_variant
Prunus persica	HY2	Pp03	6342180	HY2_B1-2-2-1-H1-1;HY2_B1-2-2-1-H1-2;HY2_B1-2-2-1-H1-3	SNV:C>T	intergenic_variant
Prunus persica	HY2	Pp03	7576872	HY2_B1-2-1-2-1-L1	SNV:C>T	intron_variant
Prunus persica	HY2	Pp03	7735700	HY2_B2-1-2-1-1-H1	SNV:T>C	3_prime_UTR_variant
Prunus persica	HY2	Pp03	7836644	HY2_B1-2-1-1	INS:A	intergenic_variant
Prunus persica	HY2	Pp03	8355321	HY2_B1-2-2-1-L1;HY2_B1-2-2-1-H1-1;HY2_B1-2-2-1-H1-2;HY2_B1-2-2-1-H1-3	SNV:G>A	intergenic_variant
Prunus persica	HY2	Pp03	8661469	HY2_B2-1-1-1-L1	SNV:A>G	intron_variant
Prunus persica	HY2	Pp03	10456642	HY2_B1-2-2-1-H1-1;HY2_B1-2-2-1-H1-2;HY2_B1-2-2-1-H1-3	DEL:G	intergenic_variant
Prunus persica	HY2	Pp03	10968764	HY2_B2-1-1-1-L1	SNV:T>C	intergenic_variant
Prunus persica	HY2	Pp03	12079222	HY2_B1-3-1-3-H1;HY2_B1-3-1-3-H2	SNV:G>A	intergenic_variant
Prunus persica	HY2	Pp03	12880436	HY2_B2-2-L1	SNV:C>G	intergenic_variant
Prunus persica	HY2	Pp03	13531236	HY2_B1-2-2-1-L1	SNV:G>A	intergenic_variant
Prunus persica	HY2	Pp03	15520984	HY2_B1-1-L1;HY2_B1-1-H1	SNV:C>T	missense_variant
Prunus persica	HY2	Pp03	15798808	HY2_B1-2-1-2-1-L1	SNV:C>A	intergenic_variant
Prunus persica	HY2	Pp03	17824170	HY2_B2-1-1-1-L1	SNV:T>G	intron_variant
Prunus persica	HY2	Pp03	19594723	HY2_B1-3-1-3-H1;HY2_B1-3-1-3-H2	SNV:G>A	intergenic_variant
Prunus persica	HY2	Pp03	20403930	HY2_B1-3-1-3-H1;HY2_B1-3-1-3-H2	INS:CT	intron_variant
Prunus persica	HY2	Pp03	22086526	HY2_B2-2-L1	SNV:A>T	intergenic_variant
Prunus persica	HY2	Pp03	23186727	HY2_B1-2-2-1-L1;HY2_B1-2-2-1-H1-1;HY2_B1-2-2-1-H1-3	DEL:T	intergenic_variant
Prunus persica	HY2	Pp03	24573603	HY2_B1-2-2-2-L1	SNV:C>G	5_prime_UTR_variant
Prunus persica	HY2	Pp04	3935142	HY2_B1-3-1-2-H1	SNV:G>T	missense_variant
Prunus persica	HY2	Pp04	5982173	HY2_B1-2-2-1-L1;HY2_B1-2-2-1-H1-1;HY2_B1-2-2-1-H1-2;HY2_B1-2-2-1-H1-3	SNV:G>A	intergenic_variant
Prunus persica	HY2	Pp04	10819203	HY2_B2-1-2-1-3-H1	SNV:G>A	synonymous_variant
Prunus persica	HY2	Pp04	11197391	HY2_B1-3-1-3-H1	SNV:G>A	intergenic_variant
Prunus persica	HY2	Pp04	11817895	HY2_B2-2-L1	SNV:G>A	intergenic_variant
Prunus persica	HY2	Pp04	12806096	HY2_B1-1-H1	SNV:C>T	intergenic_variant
Prunus persica	HY2	Pp04	14318883	HY2_B1-2-1-1	SNV:C>T	intergenic_variant
Prunus persica	HY2	Pp04	15462752	HY2_B2-1-1-3-L1	SNV:C>T	intergenic_variant
Prunus persica	HY2	Pp04	21290805	HY2_B1-2-1-1	SNV:C>T	intergenic_variant
Prunus persica	HY2	Pp04	21399810	HY2_B2-1-1-1-L1;HY2_B2-1-1-1-H1;HY2_B2-1-1-3-L1	SNV:G>A	intergenic_variant
Prunus persica	HY2	Pp04	24098336	HY2_B2-1-1-1-L1;HY2_B2-1-1-1-H1;HY2_B2-1-1-3-L1;HY2_B2-1-2-1-1-L1;HY2_B2-1-2-1-1-H1;HY2_B2-1-2-1-3-H1;HY2_B2-1-2-1-3-H2;HY2_B2-1-2-1-3-H3;HY2_B2-1-T1-L1;HY2_B2-2-L1;HY2_B2-T1-L1	SNV:G>A	intergenic_variant
Prunus persica	HY2	Pp04	25063197	HY2_B1-3-1-3-H1;HY2_B1-3-1-3-H2	SNV:T>C	intergenic_variant
Prunus persica	HY2	Pp05	491917	HY2_B1-3-1-2-L1	SNV:G>A	intergenic_variant
Prunus persica	HY2	Pp05	1743884	HY2_B2-1-2-1-3-H2	SNV:A>G	intergenic_variant
Prunus persica	HY2	Pp05	2001924	HY2_B2-2-L1	SNV:T>G	intergenic_variant
Prunus persica	HY2	Pp05	2933903	HY2_B1-3-1-3-L1	SNV:T>A	intergenic_variant
Prunus persica	HY2	Pp05	7265887	HY2_B2-1-1-3-L1	SNV:T>A	intergenic_variant
Prunus persica	HY2	Pp05	7555101	HY2_B1-2-1-2-2-L1	SNV:G>A	intergenic_variant
Prunus persica	HY2	Pp05	7595680	HY2_B1-2-2-1-L1;HY2_B1-2-2-1-H1-1;HY2_B1-2-2-1-H1-2;HY2_B1-2-2-1-H1-3	SNV:G>A	intergenic_variant
Prunus persica	HY2	Pp05	10300594	HY2_B2-1-1-1-L1;HY2_B2-1-1-1-H1	INS:GA	intergenic_variant
Prunus persica	HY2	Pp05	12481180	HY2_B2-1-2-1-1-H1	SNV:A>G	intron_variant
Prunus persica	HY2	Pp06	80621	HY2_B1-2-2-1-L1;HY2_B1-2-2-1-H1-1;HY2_B1-2-2-1-H1-2;HY2_B1-2-2-1-H1-3	SNV:G>A	intron_variant
Prunus persica	HY2	Pp06	278352	HY2_B1-3-1-3-H1;HY2_B1-3-1-3-H2	SNV:G>A	intron_variant
Prunus persica	HY2	Pp06	1404804	HY2_B2-1-1-1-L1;HY2_B2-1-1-1-H1	SNV:C>T	missense_variant
Prunus persica	HY2	Pp06	4251552	HY2_B1-3-1-2-L1	SNV:C>T	intergenic_variant
Prunus persica	HY2	Pp06	6348260	HY2_B1-3-1-3-H1;HY2_B1-3-1-3-H2	SNV:G>A	missense_variant
Prunus persica	HY2	Pp06	9513319	HY2_B2-1-2-1-3-H1	SNV:G>A	intergenic_variant
Prunus persica	HY2	Pp06	9531060	HY2_B1-3-1-2-H1;HY2_B1-3-1-3-H1;HY2_B1-3-1-3-H2;HY2_B1-3-1-3-L1	SNV:C>T	intergenic_variant
Prunus persica	HY2	Pp06	9702185	HY2_B1-1-L1	SNV:C>T	intron_variant
Prunus persica	HY2	Pp06	9859779	HY2_B1-3-1-2-H1	SNV:G>A	intergenic_variant
Prunus persica	HY2	Pp06	10289393	HY2_B1-2-1-2-1-L1	SNV:A>T	intergenic_variant
Prunus persica	HY2	Pp06	11907987	HY2_B2-1-2-1-1-L1;HY2_B2-1-2-1-1-H1;HY2_B2-1-2-1-3-H1;HY2_B2-1-2-1-3-H2;HY2_B2-1-2-1-3-H3	SNV:G>A	intergenic_variant
Prunus persica	HY2	Pp06	16931568	HY2_B1-2-1-3-L1	SNV:G>A	intergenic_variant
Prunus persica	HY2	Pp06	19631538	HY2_B1-3-1-2-L1	SNV:C>T	intron_variant
Prunus persica	HY2	Pp06	19875173	HY2_B1-2-2-2-L1	SNV:A>G	synonymous_variant
Prunus persica	HY2	Pp06	20652885	HY2_B2-1-2-1-3-H1	SNV:G>A	intergenic_variant
Prunus persica	HY2	Pp06	25086325	HY2_B1-3-1-2-H1	SNV:C>A	intergenic_variant
Prunus persica	HY2	Pp06	26258287	HY2_B2-2-L1	SNV:A>G	intergenic_variant
Prunus persica	HY2	Pp06	30030229	HY2_B1-3-1-3-H1	SNV:C>T	intergenic_variant
Prunus persica	HY2	Pp06	30054938	HY2_B1-2-2-1-H1-1	SNV:G>A	intergenic_variant
Prunus persica	HY2	Pp07	1858428	HY2_B1-2-2-1-H1-1;HY2_B1-2-2-1-H1-2;HY2_B1-2-2-1-H1-3	SNV:C>T	intergenic_variant
Prunus persica	HY2	Pp07	2686875	HY2_B1-3-1-3-L1	SNV:C>T	intergenic_variant
Prunus persica	HY2	Pp07	3371745	HY2_B1-2-2-1-H1-1	SNV:C>T	intergenic_variant
Prunus persica	HY2	Pp07	4409825	HY2_B1-2-2-1-L1;HY2_B1-2-2-1-H1-1;HY2_B1-2-2-1-H1-2;HY2_B1-2-2-1-H1-3	SNV:G>T	intergenic_variant
Prunus persica	HY2	Pp07	5263044	HY2_B1-3-1-4-L1	SNV:G>A	5_prime_UTR_variant
Prunus persica	HY2	Pp07	5647802	HY2_B1-1-H1	SNV:A>T	missense_variant
Prunus persica	HY2	Pp07	6398614	HY2_B1-3-1-2-H1	SNV:C>T	intergenic_variant
Prunus persica	HY2	Pp07	7602796	HY2_B2-1-1-3-L1	SNV:C>T	intergenic_variant
Prunus persica	HY2	Pp07	13223385	HY2_B2-1-T1-L1	SNV:G>A	intron_variant
Prunus persica	HY2	Pp07	21049410	HY2_B1-2-2-2-H1;HY2_B1-2-2-2-L1	SNV:C>T	intron_variant
Prunus persica	HY2	Pp08	6196242	HY2_B1-2-2-2-H1;HY2_B1-2-2-2-L1	DEL:A	intergenic_variant
Prunus persica	HY2	Pp08	6569316	HY2_B2-1-2-1-3-H1;HY2_B2-1-2-1-3-H2;HY2_B2-1-2-1-3-H3	SNV:G>A	intergenic_variant
Prunus persica	HY2	Pp08	7872285	HY2_B1-3-1-4-L1	SNV:G>A	intergenic_variant
Prunus persica	HY2	Pp08	7942869	HY2_B2-1-1-1-H1	SNV:G>A	intergenic_variant
Prunus persica	HY2	Pp08	8258353	HY2_B2-1-2-1-3-H1	SNV:G>A	intergenic_variant
Prunus persica	HY2	Pp08	8278555	HY2_B1-2-1-2-2-L1	SNV:C>T	intergenic_variant
Prunus persica	HY2	Pp08	8742154	HY2_B2-1-1-1-L1;HY2_B2-1-1-1-H1;HY2_B2-1-1-3-L1;HY2_B2-1-2-1-1-L1;HY2_B2-1-2-1-1-H1;HY2_B2-1-2-1-3-H1;HY2_B2-1-2-1-3-H2;HY2_B2-1-2-1-3-H3;HY2_B2-1-T1-L1;HY2_B2-2-L1;HY2_B2-T1-L1	SNV:G>A	intergenic_variant
Prunus persica	HY2	Pp08	9194249	HY2_B1-2-2-2-H1;HY2_B1-2-2-2-L1	SNV:C>T	intergenic_variant
Prunus persica	HY2	Pp08	9446662	HY2_B2-1-2-1-1-L1	SNV:T>A	intergenic_variant
Prunus persica	HY2	Pp08	11157586	HY2_B1-1-L1	SNV:C>T	intergenic_variant
Prunus persica	HY2	Pp08	11582503	HY2_B1-2-2-1-L1;HY2_B1-2-2-1-H1-1;HY2_B1-2-2-1-H1-3	SNV:C>T	intergenic_variant
Prunus persica	HY2	Pp08	12259794	HY2_B1-1-H1;HY2_B1-3-1-2-L1;HY2_B1-3-1-2-H1;HY2_B1-3-1-3-H1;HY2_B1-3-1-3-H2	SNV:T>A	intron_variant
Prunus persica	HY2	Pp08	15131227	HY2_B2-1-1-1-H1	SNV:G>A	intergenic_variant
Prunus persica	HY2	Pp08	15531166	HY2_B2-1-T1-L1	SNV:G>T	intergenic_variant
Prunus persica	HY2	Pp08	15924159	HY2_B2-1-2-1-1-L1;HY2_B2-1-2-1-3-H1;HY2_B2-1-2-1-3-H2;HY2_B2-1-2-1-3-H3	SNV:C>T	intergenic_variant
Prunus persica	HY2	Pp08	16929825	HY2_B2-1-1-1-L1;HY2_B2-1-1-1-H1	SNV:C>G	intergenic_variant
Prunus persica	HY2	Pp08	19638724	HY2_B2-1-2-1-1-H1;HY2_B2-1-2-1-3-H2;HY2_B2-1-2-1-3-H3	INS:TA	intergenic_variant
Brachypodium distachyon	WD2	Bd1	4477164	WD2_B2-1-2-1-S2-P2	SNV:C>T	intergenic_variant
Brachypodium distachyon	WD2	Bd1	17432467	WD2_B3-2-S2-P3	SNV:C>G	intergenic_variant
Brachypodium distachyon	WD2	Bd1	24496932	WD2_B3-1-S-P3	SNV:G>C	intergenic_variant
Brachypodium distachyon	WD2	Bd1	31836373	WD2_B2-1-2-2-S3-P1	SNV:C>T	intergenic_variant
Brachypodium distachyon	WD2	Bd1	35212026	WD2_B2-1-2-2-S3-P1	SNV:C>A	intergenic_variant
Brachypodium distachyon	WD2	Bd1	38783463	WD2_B1-1-S3-P6	SNV:G>A	intron_variant
Brachypodium distachyon	WD2	Bd1	40883516	WD2_B2-1-2-1-S2-P2	SNV:T>C	intergenic_variant
Brachypodium distachyon	WD2	Bd1	54013508	WD2_B2-1-2-1-S2-P3	DEL:AACAAC	intergenic_variant
Brachypodium distachyon	WD2	Bd1	67401759	WD2_B2-1-2-1-S2-P2	SNV:C>A	missense_variant
Brachypodium distachyon	WD2	Bd1	74613430	WD2_B2-1-2-1-S3-P4	INS:TCTT	intergenic_variant
Brachypodium distachyon	WD2	Bd2	1425274	WD2_B2-1-2-2-S3-P3	SNV:A>C	missense_variant
Brachypodium distachyon	WD2	Bd2	3144217	WD2_B2-1-2-1-S2-P3	INS:G	3_prime_UTR_variant
Brachypodium distachyon	WD2	Bd2	7475956	WD2_B3-1-S-P3	SNV:A>G	intron_variant
Brachypodium distachyon	WD2	Bd2	16476079	WD2_B2-2-S2-P5	SNV:A>G	synonymous_variant
Brachypodium distachyon	WD2	Bd2	25171324	WD2_B2-1-2-1-S3-P4	SNV:G>C	intergenic_variant
Brachypodium distachyon	WD2	Bd2	26963130	WD2_B3-2-S2-P3	SNV:G>A	intergenic_variant
Brachypodium distachyon	WD2	Bd2	32411779	WD2_B3-3-S-P4	SNV:C>T	intergenic_variant
Brachypodium distachyon	WD2	Bd2	46963518	WD2_B2-1-2-2-S3-P1	SNV:C>T	intergenic_variant
Brachypodium distachyon	WD2	Bd3	10426867	WD2_B3-2-S3-P1	SNV:C>T	intergenic_variant
Brachypodium distachyon	WD2	Bd3	15953634	WD2_B2-1-2-1-S3-P5	SNV:C>T	intergenic_variant
Brachypodium distachyon	WD2	Bd3	23487162	WD2_B2-1-2-2-S3-P1	SNV:G>C	intergenic_variant
Brachypodium distachyon	WD2	Bd3	26136388	WD2_B2-1-2-2-S3-P4	SNV:G>C	intergenic_variant
Brachypodium distachyon	WD2	Bd3	34988408	WD2_B2-1-2-1-S3-P4	RPL:AGG>AA	intergenic_variant
Brachypodium distachyon	WD2	Bd3	49295565	WD2_B2-1-2-2-S3-P5	SNV:G>A	intergenic_variant
Brachypodium distachyon	WD2	Bd3	54389435	WD2_B3-3-S-P4	DEL:CACAAGCATTACACAGTTGGAAAAGTCTTTTTACAATTC	intergenic_variant
Brachypodium distachyon	WD2	Bd3	55797262	WD2_B3-2-S3-P1	SNV:T>C	intergenic_variant
Brachypodium distachyon	WD2	Bd4	9086329	WD2_B1-1-S3-P6	SNV:A>C	intergenic_variant
Brachypodium distachyon	WD2	Bd4	10401861	WD2_B2-1-2-1-S3-P4	SNV:G>A	intergenic_variant
Brachypodium distachyon	WD2	Bd4	19528045	WD2_B2-1-2-2-S3-P5	SNV:G>A	intergenic_variant
Brachypodium distachyon	WD2	Bd4	30623903	WD2_B2-1-2-1-S2-P3	SNV:C>T	intergenic_variant
Brachypodium distachyon	WD2	Bd4	33395432	WD2_B3-3-S-P4	SNV:C>T	intergenic_variant
Brachypodium distachyon	WD2	Bd5	5758321	WD2_B2-1-2-1-S3-P5	SNV:C>T	intron_variant
Brachypodium distachyon	WD2	Bd5	17930509	WD2_B2-1-2-2-S3-P5	SNV:C>T	intergenic_variant
Brachypodium distachyon	WD2	Bd5	20120628	WD2_B2-1-2-2-S3-P4	DEL:GTTAGG	intergenic_variant
Brachypodium distachyon	WD2	Bd5	24025818	WD2_B2-1-2-1-S2-P2	SNV:C>T	intergenic_variant
Oryza sativa	NIPB	chr01	92499	NIPB-S8-10-3;NIPB-S8-10-4;NIPB-S8-12-T1;NIPB-S8-12-T2;NIPB-S8-12-T3;NIPB-S8-12-T4;NIPB-S8-12-T5;NIPB-S8-12-T8;NIPB-S8-12-T9;NIPB-S8-8-1;NIPB-S8-9-2;NIPB-S8-9-3;NIPB-S8-9-5;NIPB-S8-9-6	SNV:A>C	intergenic_variant
Oryza sativa	NIPB	chr01	722312	NIPB-S8-10-3;NIPB-S8-10-4	SNV:G>A	intron_variant
Oryza sativa	NIPB	chr01	752646	NIPB-S8-9-5	SNV:G>A	5_prime_UTR_variant
Oryza sativa	NIPB	chr01	821034	NIPB-S8-12-T1;NIPB-S8-12-T2;NIPB-S8-12-T3;NIPB-S8-12-T4;NIPB-S8-12-T5;NIPB-S8-12-T8;NIPB-S8-12-T9	MNV:GT>AA	intergenic_variant
Oryza sativa	NIPB	chr01	1077496	NIPB-S8-10-3;NIPB-S8-10-4	SNV:T>A	intergenic_variant
Oryza sativa	NIPB	chr01	1166151	NIPB-S8-9-2	SNV:C>T	missense_variant
Oryza sativa	NIPB	chr01	1323511	NIPB-S8-12-T1;NIPB-S8-12-T2;NIPB-S8-12-T3;NIPB-S8-12-T4;NIPB-S8-12-T5;NIPB-S8-12-T8;NIPB-S8-12-T9	SNV:A>C	intergenic_variant
Oryza sativa	NIPB	chr01	1421432	NIPB-S8-10-3;NIPB-S8-10-4;NIPB-S8-9-3;NIPB-S8-9-5;NIPB-S8-9-6	SNV:C>T	intergenic_variant
Oryza sativa	NIPB	chr01	1426516	NIPB-S8-12-T1;NIPB-S8-12-T2;NIPB-S8-12-T3;NIPB-S8-12-T4;NIPB-S8-12-T5;NIPB-S8-12-T8;NIPB-S8-12-T9	SNV:C>A	intron_variant
Oryza sativa	NIPB	chr01	1444440	NIPB-S8-10-3;NIPB-S8-10-4	SNV:G>A	missense_variant
Oryza sativa	NIPB	chr01	1450086	NIPB-S8-9-3;NIPB-S8-9-5;NIPB-S8-9-6	SNV:G>C	stop_lost
Oryza sativa	NIPB	chr01	1631353	NIPB_T7	SNV:C>T	intergenic_variant
Oryza sativa	NIPB	chr01	2161407	NIPB-S8-16-1	SNV:C>G	intergenic_variant
Oryza sativa	NIPB	chr01	2296337	NIPB-S8-12-T1;NIPB-S8-12-T2;NIPB-S8-12-T3;NIPB-S8-12-T4;NIPB-S8-12-T5;NIPB-S8-12-T8;NIPB-S8-12-T9	SNV:G>T	missense_variant
Oryza sativa	NIPB	chr01	2331149	NIPB-S8-10-3;NIPB-S8-10-4	SNV:T>G	intergenic_variant
Oryza sativa	NIPB	chr01	2522960	NIPB-S2-9-2-T3;NIPB-S2-9-2-T9	SNV:T>G	intergenic_variant
Oryza sativa	NIPB	chr01	3087296	NIPB-S8-9-2	SNV:C>A	intron_variant
Oryza sativa	NIPB	chr01	3290110	NIPB-S8-12-T1;NIPB-S8-12-T2;NIPB-S8-12-T3;NIPB-S8-12-T4;NIPB-S8-12-T5;NIPB-S8-12-T8;NIPB-S8-12-T9	SNV:C>A	intergenic_variant
Oryza sativa	NIPB	chr01	3577015	NIPB-S8-12-T1;NIPB-S8-12-T2;NIPB-S8-12-T3;NIPB-S8-12-T4;NIPB-S8-12-T5;NIPB-S8-12-T8;NIPB-S8-12-T9	SNV:A>C	intergenic_variant
Oryza sativa	NIPB	chr01	3689153	NIPB-S8-9-3	SNV:C>A	intergenic_variant
Oryza sativa	NIPB	chr01	3772304	NIPB-S2-9-2-T3;NIPB-S2-9-2-T9	SNV:G>A	intergenic_variant
Oryza sativa	NIPB	chr01	3999371	NIPB-S8-10-3;NIPB-S8-10-4	SNV:A>C	intergenic_variant
Oryza sativa	NIPB	chr01	4569557	NIPB-S8-9-2	SNV:T>C	intergenic_variant
Oryza sativa	NIPB	chr01	4668245	NIPB-S8-9-3	SNV:A>T	5_prime_UTR_premature_start_codon_gain_variant
Oryza sativa	NIPB	chr01	4951333	NIPB-S8-10-3;NIPB-S8-10-4	SNV:C>T	3_prime_UTR_variant
Oryza sativa	NIPB	chr01	5049556	NIPB-S8-16-1	SNV:A>C	intergenic_variant
Oryza sativa	NIPB	chr01	5049696	NIPB-S8-12-T1;NIPB-S8-12-T2;NIPB-S8-12-T3;NIPB-S8-12-T4;NIPB-S8-12-T5;NIPB-S8-12-T8;NIPB-S8-12-T9	SNV:A>T	intergenic_variant
Oryza sativa	NIPB	chr01	5170219	NIPB-S8-12-T1;NIPB-S8-12-T2;NIPB-S8-12-T3;NIPB-S8-12-T4;NIPB-S8-12-T5;NIPB-S8-12-T8;NIPB-S8-12-T9	SNV:C>T	intergenic_variant
Oryza sativa	NIPB	chr01	5384944	NIPB-S2-9-2-T3;NIPB-S2-9-2-T9	SNV:A>G	3_prime_UTR_variant
Oryza sativa	NIPB	chr01	5624442	NIPB-S8-9-2	SNV:C>T	intergenic_variant
Oryza sativa	NIPB	chr01	5701878	NIPB-S8-9-5	SNV:A>G	intron_variant
Oryza sativa	NIPB	chr01	5851851	NIPB-S8-10-3;NIPB-S8-10-4;NIPB-S8-9-3;NIPB-S8-9-5;NIPB-S8-9-6	SNV:G>T	intergenic_variant
Oryza sativa	NIPB	chr01	6089485	NIPB-S8-12-T8	SNV:G>A	intergenic_variant
Oryza sativa	NIPB	chr01	6192169	NIPB-S8-10-3;NIPB-S8-10-4	SNV:C>A	missense_variant
Oryza sativa	NIPB	chr01	6229611	NIPB-S8-12-T1;NIPB-S8-12-T2;NIPB-S8-12-T3;NIPB-S8-12-T4;NIPB-S8-12-T5;NIPB-S8-12-T8;NIPB-S8-12-T9	SNV:C>T	intergenic_variant
Oryza sativa	NIPB	chr01	6684374	NIPB-S2-9-2-T9	SNV:A>G	intergenic_variant
Oryza sativa	NIPB	chr01	6781482	NIPB-S8-9-2	SNV:G>C	intergenic_variant
Oryza sativa	NIPB	chr01	7099320	NIPB-S2-9-2-T3;NIPB-S2-9-2-T9	SNV:C>G	intergenic_variant
Oryza sativa	NIPB	chr01	7257567	NIPB-S8-16-1	SNV:C>T	intergenic_variant
Oryza sativa	NIPB	chr01	7837975	NIPB_T6	SNV:C>T	intergenic_variant
Oryza sativa	NIPB	chr01	7887083	NIPB-S8-16-1	SNV:A>G	intergenic_variant
Oryza sativa	NIPB	chr01	8045096	NIPB-S8-10-4	SNV:C>A	intergenic_variant
Oryza sativa	NIPB	chr01	8786135	NIPB-S8-10-3;NIPB-S8-10-4;NIPB-S8-9-3;NIPB-S8-9-5;NIPB-S8-9-6	SNV:C>T	intergenic_variant
Oryza sativa	NIPB	chr01	9484302	NIPB-S8-9-6	SNV:A>T	intergenic_variant
Oryza sativa	NIPB	chr01	9544253	NIPB-S2-9-2-T3;NIPB-S2-9-2-T9	SNV:C>T	intergenic_variant
[truncated: 8,507 more rows]
